# Supplementary material for: Room-temperature cobalt-catalyzed arylation of aromatic acids: overriding the ortho-selectivity via the oxidative assembly of carboxylate and aryl titanate reagents using oxygen
Source: Royal Society of Chemistry journal article supplement (doi:10.1039/c5ob02496j), 2015-12-22
Supplement: c5ob02496j1.pdf [file c5ob02496j1.pdf]

## Supporting information

# Room-Temperature Cobalt-Catalyzed Arylation of Aromatic Acid: Overriding *Ortho*-Selectivity via Oxidative Assembly of Carboxylate and Aryl Titanate Reagents Using Oxygen

*Kun-Ming Liu, Rui Zhang and Xin-Fang Duan\**

College of Chemistry, Beijing Normal University, Beijing, 100875, China

Fax +86(01)58802235; E-mail: xinfangduan@vip.163.com

### Table of contents

|                                                                   |            |
|-------------------------------------------------------------------|------------|
| <b>General remarks</b>                                            | <b>S2</b>  |
| <b>Typical procedure (3ad)</b>                                    | <b>S2</b>  |
| <b>Characterization Data for Products</b>                         | <b>S3</b>  |
| <b>References</b>                                                 | <b>S17</b> |
| <b>Copies of <sup>1</sup>H NMR and <sup>13</sup>C NMR spectra</b> | <b>S19</b> |

## General remarks.

All NMR spectra were collected using a 400 MHz (100 MHz for  $^{13}\text{C}$  spectroscopy) and all spectra recorded with tetramethylsilane as an internal standard unless otherwise noted. High resolution mass spectra (HRMS) were obtained with a microTOF (ESI). Infrared data were acquired using an FT-IR spectrophotometer. Melting points were recorded on a microscopic instrument and uncorrected.

The corresponding glassware used for aryl magnesium reagents or lithium reagents was oven dried (120 °C) and cooled under a stream of argon gas. Aryl Grignard reagents such as phenyl magnesium or 4-methoxyphenyl magnesium were prepared according to standard procedure. Functionalized aryl Grignard reagents such as 2-cyanophenyl magnesium chloride or 4-(ethoxycarbonyl)phenyl magnesium chloride were prepared via iodine-magnesium exchange using *i*-PrMgCl·LiCl according to Knochel's method.<sup>[1]</sup> All the Grignard reagents were titrated before use.<sup>[2]</sup>

## Typical procedure (3ad)

Under Ar atmosphere, a solution of *i*-PrMgCl·LiCl (5 mmol, 1.0 M in THF) was added dropwise to a solution of ethyl 4-iodobenzoate (1380 mg, 5 mmol) in 10 mL THF at -40 °C and stirred for 1h at that temperature. A solution of Ti(OEt)<sub>4</sub> (570 mg, 2.5 mmol) in 10 mL THF added dropwise to that mixture. The stirring was continued for 1 h and then the temperature was allowed to come to 0 °C.

In another three neck flask, a solution of Ti(OEt)<sub>4</sub> (570 mg, 2.5 mmol) in 10 mL THF was added dropwise to 5 mmol Lithium (2-carboxylatophenyl) lithium (prepared from benzoic acid via direct metalation using 2.2 equiv. *s*-BuLi/TMEDA (1:1) according to the literature<sup>[3]</sup>). The temperature of this mixture was allowed to come to 0 °C during 1 h. The above-prepared Grignard reagent was added in and stirred at room temperature for 0.5 h. To the resulting mixture a solution of CoCl<sub>2</sub> (48.8 mg, 0.38

mmol), DMPU (195 mg, 1.5 mmol) in THF (5 ml) was added in at one portion. The Ar atmosphere was changed into O<sub>2</sub> atmosphere (applied by an oxygen bag). The thus-obtained mixture was stirred at room temperature until the completion of the reaction (monitored by TLC). The reaction was quenched with diluted HCl solution and extracted with CH<sub>2</sub>Cl<sub>2</sub>. The organic layer was dried over Na<sub>2</sub>SO<sub>4</sub> and concentrated to yield the crude compound, which was purified by column chromatography to yield the desired product **3ad**.

## Characterization Data

### 4'-Methoxy-[1,1'-biphenyl]-2-carboxylic acid (**3aa**)

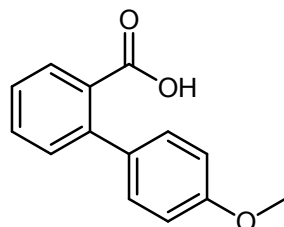

As described in the typical procedure for **3ad**, the product was isolated as a white solid in 75% yield. m.p. = 136–138 °C (lit. 138–140 °C);  $R_f$  = 0.35 (petroleum ether/ethyl acetate/acetic acid = 5:1:0.01). IR (cm<sup>-1</sup>, KBr): 2977, 1701, 1609, 1243; <sup>1</sup>H NMR (CDCl<sub>3</sub>, 400 MHz) (ppm) 7.92 (d,  $J$  = 7.6 Hz, 1H) , 7.52–7.56 (m, 1H), 7.35–7.39 (m, 2H) , 7.26 (d,  $J$  = 8.6 Hz, 2H), 6.92 (d,  $J$  = 8.6 Hz, 2H), 3.85 (s, 3H); <sup>13</sup>C NMR (DMSO-d<sub>6</sub>, 100 MHz) (ppm) 169.8, 158.6, 140.4, 133.0, 132.3, 130.6, 130.3, 129.4, 128.9, 126.7, 113.6, 55.1. Data was consistent with that reported in the literature. [4]

### [1,1'-Biphenyl]-2-carboxylic acid (**3ab**)

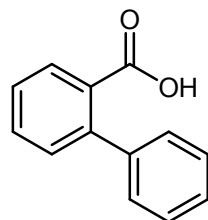

As described in the typical procedure for **3ad**, the product was isolated as a white solid in 80% yield. m.p. = 110–112 °C (lit. 108–110 °C);  $R_f$  = 0.34 (petroleum

ether/ethyl acetate/acetic acid = 6:1:0.01). IR (cm<sup>-1</sup>, KBr): 1693, 1596, 1483, 1295, 750, 700; <sup>1</sup>H NMR (CDCl<sub>3</sub>, 400 MHz) (ppm) 7.94 (d, *J* = 7.5 Hz, 1H), 7.56 (t, *J* = 7.4 Hz, 1H), 7.35–7.44 (m, 7H); <sup>13</sup>C NMR (CDCl<sub>3</sub>, 100 MHz) (ppm) 173.8, 143.5, 141.0, 134.8, 132.4, 131.2, 130.7, 129.3, 128.5, 128.1, 127.3, 127.22, 127.18. Data was consistent with that reported in the literature.<sup>[4]</sup>

### 2-(Naphthalen-1-yl)benzoic acid (3ac)

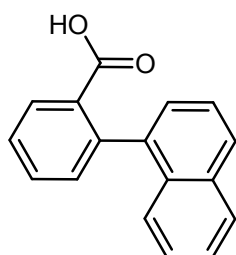

As described in the typical procedure for **3ad**, the product was isolated as a white solid in 72% yield. m.p. = 174.4–175.6 °C (lit. 174–175 °C); *R<sub>f</sub>* = 0.32 (petroleum ether/ethyl acetate/acetic acid = 6:1:0.01). IR (cm<sup>-1</sup>, KBr): 3410, 3056, 1701, 1602, 1303, 754; <sup>1</sup>H NMR (CDCl<sub>3</sub>, 400 MHz) (ppm) 11.48 (br s, 1H), 8.13–8.11 (m, 1H), 8.06–7.83 (m, 2H), 7.68–7.60 (m, 1H), 7.53–7.42 (m, 3H), 7.38–7.29 (m, 4H); <sup>13</sup>C NMR (CDCl<sub>3</sub>, 100 MHz) (ppm) 171.3, 142.2, 139.3, 134.9, 133.5, 132.5, 132.4, 132.3, 130.0, 128.2, 127.7, 127.3, 126.1, 126.0, 125.6, 125.5, 125.2. Data was consistent with that reported in the literature.<sup>[5]</sup>

### 4'-(Ethoxycarbonyl)-[1,1'-biphenyl]-2-carboxylic acid (3ad)

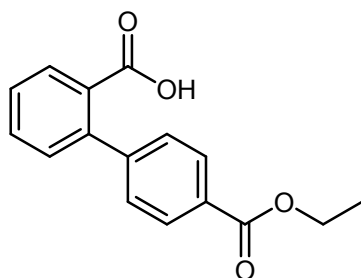

As described in the typical procedure for **3ad**, the product was isolated as a white solid in 73% yield. m.p. = 113.6–114.3 °C; *R<sub>f</sub>* = 0.42 (petroleum ether/ethyl acetate/acetic acid = 5:1:0.01). IR (cm<sup>-1</sup>, KBr): 3392, 3061, 2987, 1705, 1693, 1280, 754; <sup>1</sup>H NMR (CDCl<sub>3</sub>, 400 MHz) (ppm) 8.07 (d, *J* = 8.2Hz, 1H), 8.00 (d, *J* = 1.1Hz,

1H), 7.99 (d,  $J = 1.1$  Hz, 1H), 7.61–7.57 (m, 1H), 7.48–7.45 (m, 1H), 7.40–7.34 (m, 3H), 4.40 (q,  $J = 7.2$  Hz, 2H), 1.41 (t,  $J = 7.2$  Hz, 3H);  $^{13}\text{C}$  NMR ( $\text{CDCl}_3$ , 100 MHz) (ppm) 172.2, 166.5, 145.8, 142.6, 132.3, 131.04, 131.00, 129.4, 129.3, 128.9, 128.5, 127.8, 61.0, 14.4. Data was consistent with that reported in the literature.<sup>[6]</sup>

### 2'-Cyano-[1,1'-biphenyl]-2-carboxylic acid (3ae)

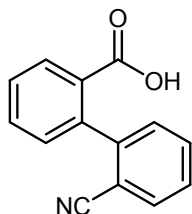

As described in the typical procedure for **3ad**, the product was isolated as a white solid in 65% yield. m.p. = 170.4–172.3 °C (lit. 170–172 °C);  $R_f = 0.38$  (petroleum ether/ethyl acetate/acetic acid = 5:1:0.01). IR ( $\text{cm}^{-1}$ , KBr): 3433, 3267, 3051, 2229, 1701, 1602, 1433, 1384, 1095, 692, 521;  $^1\text{H}$  NMR ( $\text{CDCl}_3$ , 400 MHz) (ppm) 8.12 (d,  $J = 7.4$  Hz, 1H), 7.63–7.58 (m, 3H), 7.48 (t,  $J = 7.8$  Hz, 1H), 7.34–7.24 (m, 3H);  $^{13}\text{C}$  NMR ( $\text{CDCl}_3$ , 100 MHz) (ppm) 171.0, 135.0, 134.9, 133.7, 132.2, 132.1, 130.2, 130.0, 128.6, 128.52, 128.49, 127.9, 119.2, 117.6. Data was consistent with that reported in the literature.<sup>[7]</sup>

### 5-Methoxy-[1,1'-biphenyl]-2-carboxylic acid (3bb)

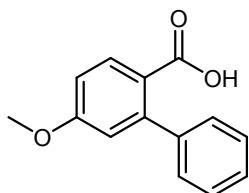

As described in the typical procedure for **3ad**, the product was isolated as a white solid in 71% yield. m.p. = 174.6–174.8 °C (lit. 171–173 °C);  $R_f = 0.33$  (petroleum ether/ethyl acetate/acetic acid = 5:1:0.01). IR ( $\text{cm}^{-1}$ , KBr): 3431, 2918, 1697, 1602, 1317, 1114, 754;  $^1\text{H}$  NMR ( $\text{CDCl}_3$ , 400 MHz) (ppm) 8.02 (d,  $J = 8.7$  Hz, 1H), 7.39–7.31 (m, 5H), 6.94–6.91 (m, 1H), 6.28 (d,  $J = 2.6$  Hz, 1H), 3.87 (s, 3H);  $^{13}\text{C}$  NMR ( $\text{CDCl}_3$ , 100 MHz) (ppm) 171.7, 162.4, 146.4, 141.4, 133.5, 128.4, 127.9, 127.4, 120.3, 116.7, 112.7, 55.5. Data was consistent with that reported in the literature.<sup>[8]</sup>

### 5-Methoxy-2'-(trifluoromethyl)-[1,1'-biphenyl]-2-carboxylic acid <sup>[9]</sup> (3bf)

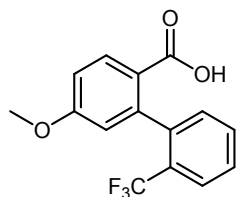

As described in **3bb**, the product was isolated as a yellow solid in 75% yield. m.p. = 115.3–116.2 °C;  $R_f$  = 0.36 (petroleum ether/ethyl acetate/acetic acid = 5:1:0.01). IR (cm<sup>-1</sup>, KBr): 3400, 2954, 1691, 1676, 1602, 1317, 1168, 763; <sup>1</sup>H NMR (CDCl<sub>3</sub>, 400 MHz) (ppm) 8.07 (d,  $J$  = 8.8 Hz, 1H), 7.69 (d,  $J$  = 7.6 Hz, 1H), 7.52–7.42 (m, 2H), 7.19 (d,  $J$  = 7.5 Hz, 1H), 6.96–6.93 (m, 1H), 6.73 (d,  $J$  = 2.6 Hz, 1H), 3.84 (s, 3H); <sup>13</sup>C NMR (CDCl<sub>3</sub>, 100 MHz) (ppm) 170.8, 162.6, 143.6, 140.4, 133.3, 130.9, 130.4, 128.0–127.3 (q), 127.2, 125.7–125.6 (q), 125.2, 123.0, 120.8 (d), 113.2, 55.5.

#### 4'-(Ethoxycarbonyl)-[1, 1'-biphenyl]-4-carboxylic acid (**3cd**)

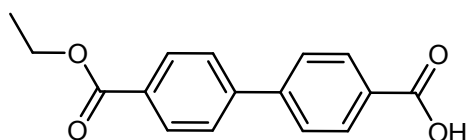

The Grignard reagent of 4-Iodobenzoic acid was prepared via I-Mg exchange method following the general procedure for **3ad**. The product was isolated as a white solid in 77% yield. m.p. = 185.7–187.4 °C;  $R_f$  = 0.46 (petroleum ether/ethyl acetate/acetic acid = 5:1:0.01). IR (cm<sup>-1</sup>, KBr): 3437, 3072, 2981, 1707, 1674, 1606, 1274, 1099, 756; <sup>1</sup>H NMR (DMSO-d<sub>6</sub>, 400 MHz) (ppm) 13.11 (br s, 1H), 8.08–8.06 (m, 4H), 7.90–7.86 (m, 4H), 4.35 (q,  $J$  = 7.0 Hz, 2H), 1.35 (t,  $J$  = 7.0 Hz, 3H); <sup>13</sup>C NMR (DMSO-d<sub>6</sub>, 100 MHz) (ppm) 167.5, 165.9, 143.9, 143.4, 130.9, 130.5, 130.3, 130.0, 127.7, 127.6, 61.3, 14.6. Data was consistent with that reported in the literature.<sup>[10]</sup>

#### 4'-(Trifluoromethyl)-[1, 1'-biphenyl]-4-carboxylic acid (**3cg**)

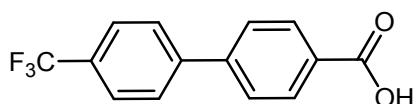

As described in **3cd**, the product was isolated as a yellow solid in 88% yield. m.p. = 120.6–121.7 °C (lit. 120.0–121.1 °C);  $R_f$  = 0.43 (petroleum ether/ethyl acetate/acetic acid = 6:1:0.01). IR (cm<sup>-1</sup>, KBr): 3412, 3078, 1689, 1608, 1323, 1128, 1070, 835; <sup>1</sup>H NMR (DMSO-d<sub>6</sub>, 400 MHz) (ppm) 13.06 (br s, 1H), 8.06 (d,  $J$  = 8.4 Hz, 2H), 7.96 (d,

$J = 7.9$  Hz, 2H), 7.89–7.85 (m, 4H);  $^{13}\text{C}$  NMR (DMSO- $d_6$ , 100 MHz) (ppm) 167.5, 143.5, 143.1, 131.0, 130.5, 128.3, 127.8, 126.3(d), 125.8, 123.7. Data was consistent with that reported in the literature.<sup>[11]</sup>

### 3'-(Trifluoromethyl)-[1, 1'-biphenyl]-3-carboxylic acid (3dh)

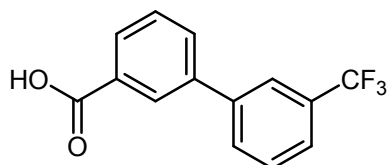

As described in **3cd**, the product was isolated as a yellow solid in 76% yield. m.p. = 163.4–164.5 °C;  $R_f = 0.37$  (petroleum ether/ethyl acetate/acetic acid = 6:1:0.01). IR ( $\text{cm}^{-1}$ , KBr): 3431, 3088, 1701, 1685, 1568, 1313, 1124, 750;  $^1\text{H}$  NMR ( $\text{CDCl}_3$ , 400 MHz) (ppm) 8.35 (s, 1H), 8.25 (s, 1H), 8.15 (d,  $J = 7.8$  Hz, 1H), 8.04 (d,  $J = 7.8$  Hz, 1H), 7.87–7.80 (m, 1H), 7.75–7.73 (m, 1H), 7.67–7.57 (m, 1H), 7.36 (t,  $J = 7.9$  Hz, 1H);  $^{13}\text{C}$  NMR ( $\text{CDCl}_3$ , 100 MHz) (ppm) 170.9, 140.2, 136.8, 133.2, 132.5, 131.2, 130.5, 130.1, 129.7, 129.5, 129.3, 128.8, 124.0, 122.6. Data was consistent with that reported in the literature.<sup>[12]</sup>

### 4', 6-Dimethoxy-[1,1'-biphenyl]-3-carboxylic acid<sup>[13]</sup> (3ba)

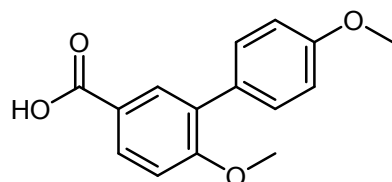

4-Methoxybenzoic acid was lithiated n-BuLi/t-BuOLi according to the reported procedure<sup>[14]</sup> and the cross-coupling was conducted as described in **3ad**. The product was isolated as a white solid in 69% yield. m.p. = 167.4–168.3 °C;  $R_f = 0.33$  (petroleum ether/ethyl acetate/acetic acid = 5:1:0.01). IR ( $\text{cm}^{-1}$ , KBr): 3433, 3034, 2984, 1695, 1602, 1257, 1026, 823;  $^1\text{H}$  NMR ( $\text{CDCl}_3$ , 400 MHz) (ppm) 8.09–8.07 (m, 2H), 7.48 (d,  $J = 6.6$  Hz, 2H), 7.01 (d,  $J = 9.2$  Hz, 1H), 6.97 (d,  $J = 8.8$  Hz, 2H), 3.90 (s, 3H), 3.86 (s, 3H);  $^{13}\text{C}$  NMR ( $\text{CDCl}_3$ , 100 MHz) (ppm) 171.4, 160.9, 159.0, 132.8, 131.1, 130.6, 130.4, 129.7, 121.6, 113.6, 110.6, 55.8, 55.3.

### 4'-Chloro-6-methoxy-[1, 1'-biphenyl]-3-carboxylic acid (3bi)

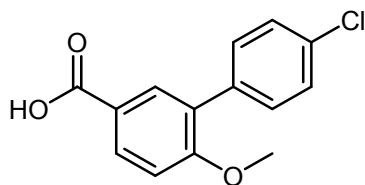

As described in **3ba**, the product was isolated as a white solid in 55% yield. m.p. = 187.4–188.3 °C;  $R_f$  = 0.35 (petroleum ether/ethyl acetate/acetic acid = 5:1:0.01). IR (cm<sup>-1</sup>, KBr): 3431, 3292, 1685, 1606, 1435, 1271, 1024, 628; <sup>1</sup>H NMR (CDCl<sub>3</sub>, 400 MHz) (ppm) 8.11 (dd,  $J$  = 8.6 Hz, 2.2 Hz, 1H), 8.05 (d,  $J$  = 2.2 Hz, 1H), 7.47 (d,  $J$  = 8.6 Hz, 2H), 7.39 (d,  $J$  = 8.6 Hz, 2H), 7.03 (d,  $J$  = 8.7 Hz, 1H), 3.90 (s, 3H); <sup>13</sup>C NMR (CDCl<sub>3</sub>, 100 MHz) (ppm) 171.1, 160.8, 135.5, 132.8, 131.8, 131.4, 130.8, 128.3, 121.7, 111.1, 110.8, 56.5. MS (HRMS)  $m/z$  calcd. for C<sub>14</sub>H<sub>11</sub>ClO<sub>3</sub> 261.0324 [M-H]<sup>-</sup>; found 261.0313.

### 3-Fluoro-[1, 1'-biphenyl]-2-carboxylic acid (**3eb**)

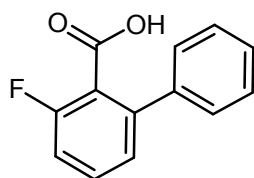

2-Fluorobenzoic acid was lithiated using 2.2 equiv. *s*-BuLi at -78 °C and the cross-coupling was conducted following the general procedure for **3ad**. The product was isolated as a white solid in 81% yield. m.p. = 115.3–117.5 °C (lit. 115–117 °C);  $R_f$  = 0.40 (petroleum ether/ethyl acetate/acetic acid = 6:1:0.01). IR (cm<sup>-1</sup>, KBr): 3412, 3011, 1707, 1614, 1462, 1257, 756; <sup>1</sup>H NMR (CDCl<sub>3</sub>, 400 MHz) (ppm) 7.62–7.42 (m, 6H), 7.31 (dd,  $J$  = 8.3 Hz, 2.5 Hz, 1H), 7.13 (t,  $J$  = 9.1 Hz, 1H); <sup>13</sup>C NMR (CDCl<sub>3</sub>, 100 MHz) (ppm) 170.9, 160.9, 142.9, 132.8, 132.4, 131.8, 128.6, 128.3, 128.2, 125.9, 114.9. Data was consistent with that reported in the literature.<sup>[15]</sup>

### 2-Fluoro-6-(naphthalen-1-yl)benzoic acid (**3ec**)

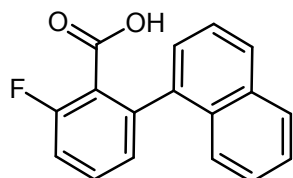

As described in **3eb**, the product was isolated as a white solid in 76% yield. m.p. = 178.4–180.0 °C;  $R_f$  = 0.40 (petroleum ether/ethyl acetate/acetic acid = 6:1:0.01). IR



( $\text{cm}^{-1}$ , KBr): 3433, 3066, 1701, 1602, 1303, 754;  $^1\text{H}$  NMR ( $\text{CDCl}_3$ , 400 MHz) (ppm) 9.23 (br s, 1H), 8.06–8.02 (m, 1H), 7.90–7.60 (m, 4H), 7.50–7.18 (m, 4H), 7.16–7.11 (m, 1H);  $^{13}\text{C}$  NMR ( $\text{CDCl}_3$ , 100 MHz) (ppm) 169.0, 161.6, 135.8, 135.7, 132.8, 132.54, 132.46, 129.0, 124.17, 124.15, 120.4, 117.3, 117.1, 115.2, 115.1. MS (HRMS)  $m/z$  calcd. for  $\text{C}_{17}\text{H}_{11}\text{FO}_2$  265.0670  $[\text{M}-\text{H}]^-$ , found 265.0667.

### 6-Chloro-4'-fluoro-[1, 1'-biphenyl]-2-carboxylic acid (3fj)

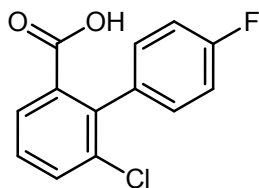

3-Chlorobenzoic acid was lithiated using 2.2 equiv. TMPLi according to the reported procedure<sup>[16]</sup> and the cross-coupling was conducted following the general procedure for **3ad**. The product was isolated as a white solid in 77% yield. m.p. = 116.7–116.9 °C;  $R_f$  = 0.37 (petroleum ether/ethyl acetate/acetic acid = 6:1:0.01). IR ( $\text{cm}^{-1}$ , KBr): 3421, 3074, 1703, 1512, 1436, 702;  $^1\text{H}$  NMR ( $\text{CDCl}_3$ , 400 MHz) (ppm) 11.22 (br s, 1H), 7.89 (dd,  $J$  = 7.8 Hz, 1.2 Hz, 1H), 7.66 (dd,  $J$  = 8.0 Hz, 1.2 Hz, 1H), 7.41–7.39 (m, 1H), 7.21–7.17 (m, 2H), 7.10 (t,  $J$  = 8.7 Hz, 2H);  $^{13}\text{C}$  NMR ( $\text{CDCl}_3$ , 100 MHz) (ppm) 172.1, 163.4, 140.5, 133.9, 133.6, 132.0, 130.7, 130.6, 129.9, 128.6, 115.1. MS (HRMS)  $m/z$  calcd. for  $\text{C}_{13}\text{H}_8\text{ClFO}_2$  249.0124  $[\text{M}-\text{H}]^-$ , found 249.0139.

### 3-Chloro-2-(thiophen-2-yl)benzoic acid (3fk)

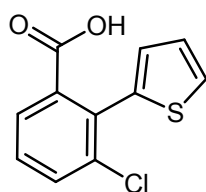

As described in **3fj**, the product was isolated as a yellow solid in 67% yield. m.p. = 108.8–109.4 °C;  $R_f$  = 0.34 (petroleum ether/ethyl acetate/acetic acid = 6:1:0.01). IR ( $\text{cm}^{-1}$ , KBr): 3527, 3068, 1665, 1608, 1433, 1253, 750;  $^1\text{H}$  NMR ( $\text{CDCl}_3$ , 400 MHz) (ppm) 10.94 (br s, 1H), 7.88 (dd,  $J$  = 8.0 Hz, 1.6 Hz, 1H), 7.71 (dd,  $J$  = 7.7 Hz, 1.5 Hz, 1H), 7.21–7.17 (m, 2H), 7.39 (t,  $J$  = 7.9 Hz, 1H), 6.91 (t,  $J$  = 8.0 Hz, 1H);  $^{13}\text{C}$  NMR ( $\text{CDCl}_3$ , 100 MHz) (ppm) 171.0, 157.9, 141.5, 137.8, 137.0, 132.5, 129.4,

129.1, 128.9, 122.5, 119.7. MS (HRMS)  $m/z$  calcd. for  $C_{11}H_7ClO_2S$  236.9783 [M-H]<sup>-</sup>, found 236.9779.

### Methyl 3-bromo-4'-methoxy-[1, 1'-biphenyl]-2-carboxylate (3ga)

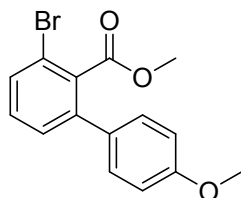

The lithium reagent of 2-bromobenzoic acid was prepared using 2 equiv. TMPLi according to the reported procedure<sup>[17]</sup> and the cross-coupling was conducted following the general procedure. The product acid was esterified using methanol and isolated as a yellow solid in 49% yield. m.p. = 87.8–89.4 °C;  $R_f$  = 0.48 (petroleum ether/ethyl acetate = 20:1). IR (cm<sup>-1</sup>, KBr): 3031, 2987, 1723, 1608, 1512, 1381, 764; <sup>1</sup>H NMR (CDCl<sub>3</sub>, 400 MHz) (ppm) 7.54 (dd,  $J$  = 6.3 Hz, 2.8 Hz, 1H), 7.31–7.29 (m, 4H), 6.93 (d,  $J$  = 8.8 Hz, 2H), 3.83 (s, 3H), 3.71 (s, 3H); <sup>13</sup>C NMR (CDCl<sub>3</sub>, 100 MHz) (ppm) 168.4, 159.5, 141.5, 135.2, 131.7, 131.0, 130.5, 129.5, 128.7, 119.6, 113.9, 55.3, 52.5. Anal. Calcd. for  $C_{15}H_{13}BrO_3$ : C, 56.10; H, 4.08. Found: C, 56.22; H, 3.99. MS (ESI): [M+H]<sup>+</sup> [ $m/z$  322 (100%), 320 (31%)].

### 4''-Fluoro-[1,1':3',1''-terphenyl]-4'-carboxylic acid (3hj)

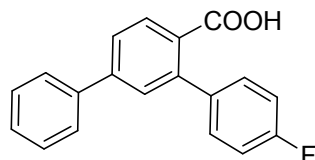

Biphenyl-4-carboxylic acid was lithiated using *s*-BuLi/TMEDA according to the reported method<sup>[18]</sup> and the cross-coupling was conducted following the general procedure. The product was isolated as a white solid in 85% yield. m.p. = 215.7–216.4 °C;  $R_f$  = 0.34 (petroleum ether/ethyl acetate/acetic acid = 6:1:0.01). IR (cm<sup>-1</sup>, KBr): 3402, 3011, 1690, 1484, 1197, 764; <sup>1</sup>H NMR (CDCl<sub>3</sub>, 400 MHz) (ppm) 8.22 (d,  $J$  = 7.7 Hz, 1H), 7.93 (d,  $J$  = 7.2 Hz, 2H), 7.31–7.13 (m, 9H); <sup>13</sup>C NMR (CDCl<sub>3</sub>, 100 MHz) (ppm) 168.1, 161.5, 141.9, 140.4, 135.4, 135.3, 131.6, 131.4, 129.0, 128.32, 128.27, 128.1, 127.63, 127.56, 115.6. Anal. Calcd. for  $C_{19}H_{13}FO_2$ : C, 78.07; H, 4.48. Found: C, 78.25; H, 4.29. MS (ESI): [M+H]<sup>+</sup> ( $m/z$  293).

#### 4-Fluoro-[1, 1':3', 1''-terphenyl]-2'-carboxylic acid (**3ij**)

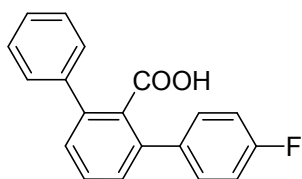

The product was prepared as described in **3hj** and isolated as a white solid in 76% yield. m.p. = 243.4–245.1 °C;  $R_f$  = 0.37 (petroleum ether/ethyl acetate/acetic acid = 6:1:0.01). IR ( $\text{cm}^{-1}$ , KBr): 3443, 3030, 1687, 1593, 1217, 833;  $^1\text{H}$  NMR ( $\text{CDCl}_3$ , 400 MHz) (ppm); 8.15 (d,  $J$  = 7.6 Hz, 2H), 7.50 (t,  $J$  = 7.7 Hz, 1H), 7.41–7.30 (m, 9H);  $^{13}\text{C}$  NMR ( $\text{CDCl}_3$ , 100 MHz) (ppm) 169.8, 161.7, 139.4, 135.4, 135.3, 132.9, 132.8, 131.6, 131.4, 129.43, 129.39, 128.1, 127.6, 119.6, 115.6. Anal. Calcd. for  $\text{C}_{19}\text{H}_{13}\text{FO}_2$ : C, 78.07; H, 4.48. Found: C, 78.17; H, 4.22. MS (ESI):  $[\text{M}+\text{H}]^+$  (m/z 293).

#### 2-(4-Methoxyphenyl)nicotinic acid (**3ja**)

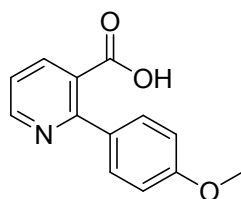

3-Pyridinecarboxylic acid was lithiated with  $n\text{-BuLi/TMPLi}$  in THF at  $-50$  °C according to the literature <sup>[19]</sup> and the cross-coupling conducted following the general procedure. The product was isolated as a yellow solid in 89% yield. m.p. = 254.3–255.4 °C;  $R_f$  = 0.27 (petroleum ether/ethyl acetate/acetic acid = 1:1:0.01). IR ( $\text{cm}^{-1}$ , KBr): 3431, 3008, 1699, 1606, 1429, 1251, 840;  $^1\text{H}$  NMR ( $\text{DMSO-d}_6$ , 400 MHz) (ppm) 13.19 (br s, 1H), 8.71 (d,  $J$  = 3.4 Hz, 1H), 8.05 (d,  $J$  = 7.4 Hz, 1H), 7.53 (d,  $J$  = 8.0 Hz, 2H), 7.43–7.40 (m, 1H), 7.01 (d,  $J$  = 8.1 Hz, 2H), 3.81 (s, 3H);  $^{13}\text{C}$  NMR ( $\text{DMSO-d}_6$ , 100 MHz) (ppm) 170.0, 160.2, 156.6, 151.1, 137.6, 132.5, 130.5, 128.4, 121.9, 114.0, 55.7. Data was consistent with that reported in the literature.<sup>[20]</sup>

#### 2-Phenylnicotinic acid (**3jb**)

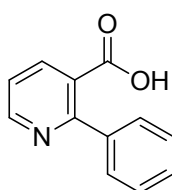

As described in **3ja**, the product was isolated as a yellow solid in 92% yield (915 mg), m.p. = 167.6–168.4 °C (lit. 168–169 °C);  $R_f$  = 0.30 (petroleum ether/ethyl acetate/acetic acid = 1:1:0.01). IR (cm<sup>-1</sup>, KBr): 3431, 3055, 2918, 1705, 1578, 1440, 1280, 754; <sup>1</sup>H NMR (CDCl<sub>3</sub>, 400 MHz) (ppm) 10.14 (br s, 1H), 8.84 (dd,  $J$  = 4.9 Hz, 1.7 Hz, 1H), 8.25–8.22 (m, 1H), 7.53–7.52 (m, 2H), 7.43–7.38 (m, 4H); <sup>13</sup>C NMR (CDCl<sub>3</sub>, 100 MHz) (ppm) 170.8, 158.9, 150.8, 139.5, 138.6, 129.1, 128.8, 128.2, 126.9, 122.1. Data was consistent with that reported in the literature.<sup>[21]</sup>

### 2-(2-Cyanophenyl)nicotinic acid (**3je**)

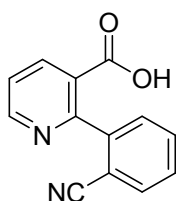

As described in **3ja**, the product was isolated as a yellow solid in 83% yield (834 mg), m.p. = 198.6–199.3 °C;  $R_f$  = 0.33 (petroleum ether/ethyl acetate/acetic acid = 1:1:0.01). IR (cm<sup>-1</sup>, KBr): 3385, 3170, 2225, 1658, 1577, 1402, 704; <sup>1</sup>H NMR (DMSO-d<sub>6</sub>, 400 MHz) (ppm) 8.50 (dd,  $J$  = 4.8 Hz, 2.8 Hz, 1H), 8.13 (dd,  $J$  = 7.6 Hz, 2.0 Hz, 1H), 7.88 (d,  $J$  = 7.1 Hz, 2H), 7.54–7.50 (m, 1H), 7.47–7.43 (m, 2H); <sup>13</sup>C NMR (DMSO-d<sub>6</sub>, 100 MHz) (ppm) 166.9, 152.3, 150.4, 143.7, 139.2, 134.7, 131.7, 128.7, 128.0, 123.8, 117.4, 114.9, 104.3. Anal. Calcd. for C<sub>13</sub>H<sub>8</sub>N<sub>2</sub>O<sub>2</sub>: C, 69.64; H, 3.60; N, 12.49. Found: C, 69.72; H, 3.46; N, 12.55. MS (ESI): [M+H]<sup>+</sup> (m/z 225).

### 3-(2-(Benzyloxy)phenyl)isonicotinic acid (**3kl**)

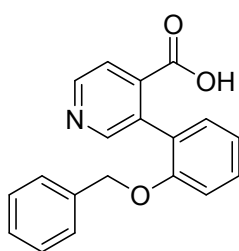

As described in **3ja**, the product was isolated as a yellow solid in 77% yield. m.p. = 187.7–188.3 °C.  $R_f$  = 0.43 (petroleum ether/ethyl acetate/acetic acid = 1:1:0.01). IR (cm<sup>-1</sup>, KBr): 3412, 3010, 1668, 1612, 1432, 1110, 837; <sup>1</sup>H NMR (CDCl<sub>3</sub>, 400 MHz) (ppm) 13.41 (br s, 1H), 8.50 (dd,  $J$  = 5.0 Hz, 0.6 Hz, 1H), 7.91 (d,  $J$  = 8.3 Hz, 1H),

7.85–7.78 (m, 3H), 7.35–7.22 (m, 4H), 7.04 (d,  $J = 1.0$  Hz, 1H), 7.02–6.89 (m, 2H), 5.19 (s, 2H);  $^{13}\text{C}$  NMR ( $\text{CDCl}_3$ , 100 MHz) (ppm) 167.3, 151.6, 149.3, 136.7, 136.4, 135.2, 129.2, 129.0, 128.7, 128.5, 128.4, 127.2, 126.3, 125.4, 119.3, 116.4, 70.1. MS (HRMS)  $m/z$  calcd. for  $\text{C}_{19}\text{H}_{15}\text{NO}_3$  306.1125  $[\text{M}+\text{H}]^+$ , found 306.1127.

### 5-Phenylthiophene-2-carboxylic acid (**3lb**)

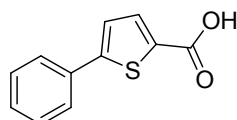

Thiophene-2-carboxylic acid was prepared using LDA according to the literature<sup>[22]</sup> and the cross-coupling was conducted following the general procedure. The product was isolated as a white solid in 80% yield. m.p. = 187.3–187.8 °C (lit. 187–188 °C);  $R_f = 0.40$  (petroleum ether/ethyl acetate/acetic acid = 5:1:0.01). IR ( $\text{cm}^{-1}$ , KBr): 3446, 3018, 1701, 1660, 1539, 1290, 746;  $^1\text{H}$  NMR ( $\text{CDCl}_3$ , 400 MHz) (ppm) 7.87 (d,  $J = 4.0$  Hz, 1H), 7.67–7.65 (m, 2H), 7.45–7.33 (m, 4H);  $^{13}\text{C}$  NMR ( $\text{CDCl}_3$ , 100 MHz) (ppm) 167.4, 153.1, 136.0, 133.3, 131.2, 129.2, 129.1, 126.4, 123.9. Data was consistent with that reported in the literature.<sup>[23]</sup>

### 5-(4-Chlorophenyl)thiophene-2-carboxylic acid (**3li**)

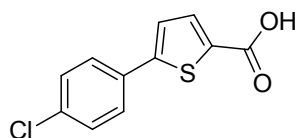

As described in **3lb**, the product was isolated as a white solid in 68% yield. m.p. = 252.7–253.6 °C (lit. 253–254 °C);  $R_f = 0.40$  (petroleum ether/ethyl acetate/acetic acid = 5:1:0.01). IR ( $\text{cm}^{-1}$ , KBr): 3421, 3099, 1653, 1535, 1311, 1093, 810, 752;  $^1\text{H}$  NMR ( $\text{DMSO-d}_6$ , 400 MHz) (ppm) 13.10 (br s, 1H), 7.77 (d,  $J = 6.8$  Hz, 2H), 7.72 (d,  $J = 3.1$  Hz, 1H), 7.60 (d,  $J = 3.1$  Hz, 1H), 7.52 (d,  $J = 6.8$  Hz, 2H);  $^{13}\text{C}$  NMR ( $\text{DMSO-d}_6$ , 100 MHz) (ppm) 163.2, 148.6, 134.8, 134.4, 133.9, 132.2, 129.7, 128.0, 125.7. Data was consistent with that reported in the literature.<sup>[23]</sup>

### 4'-Fluoro-6-methoxy-[1, 1'-biphenyl]-2-carboxylic acid<sup>[24]</sup> (**3mj**)

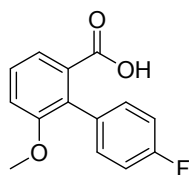

3-Methoxybenzoic acid was lithiated at C2 using TMPLi according to the literature<sup>[14]</sup> and the cross-coupling was conducted following the general procedure. The product was isolated as a white solid in 81% yield. m.p. = 196.6–198.7 °C.  $R_f$  = 0.37 (petroleum ether/ethyl acetate/acetic acid = 6:1:0.01). IR (cm<sup>-1</sup>, KBr): 3336, 3061, 1707, 1490, 1219, 887; <sup>1</sup>H NMR (CDCl<sub>3</sub>, 400 MHz) (ppm); 8.14 (d,  $J$  = 7.9 Hz, 1H), 7.50–7.44 (m, 2H), 7.36–7.33 (m, 2H), 7.14 (t,  $J$  = 8.7 Hz, 2H), 3.82 (s, 3H); <sup>13</sup>C NMR (CDCl<sub>3</sub>, 100 MHz) (ppm) 168.2, 160.9, 158.9, 132.6(d), 129.0(d), 128.5, 123.3, 123.1, 120.5(d), 115.3, 115.1, 55.4. MS (HRMS)  $m/z$  calcd. for C<sub>14</sub>H<sub>11</sub>FO<sub>3</sub> 245.0619 [M-H]<sup>-</sup>, found 245.0619.

**4'-Fluoro-2-methoxy-[1, 1'-biphenyl]-4-carboxylic acid (4mj)**

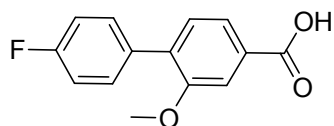

3-Methoxybenzoic acid was lithiated at C4 using n-BuLi/t-BuOK (1:1.4 equiv.) a according to the literature<sup>[14]</sup> and the cross-coupling was conducted following the general procedure. The product was isolated as a white solid in 73% yield, m.p. = 178.3–179.1 °C;  $R_f$  = 0.38 (petroleum ether/ethyl acetate/acetic acid = 6:1:0.01). IR (cm<sup>-1</sup>, KBr): 3446, 3290, 1691, 1436, 1006, 753; <sup>1</sup>H NMR (DMSO-d<sub>6</sub>, 400 MHz) (ppm) 10.10 (br s, 1H), 7.63–7.59 (m, 3H), 7.49–7.47 (m, 3H), 7.39 (s, 1H), 3.38 (s, 3H); <sup>13</sup>C NMR (DMSO-d<sub>6</sub>, 100 MHz) (ppm) 167.5, 154.8, 136.8, 132.4, 131.6, 131.3, 131.1, 130.8, 128.5, 120.9, 117.2, 55.5. MS (HRMS)  $m/z$  calcd. for C<sub>14</sub>H<sub>11</sub>FO<sub>3</sub> 245.0619 [M-H]<sup>-</sup>, found 245.0619.

**5-Fluoro-2'-(trifluoromethyl)-[1, 1'-biphenyl]-2-carboxylic acid (3nf)**

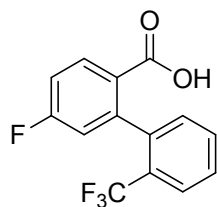

4-Fluorobenzoic acid was lithiated at C2 using 2.2 equiv. s-BuLi at -78 °C according to the literature<sup>[25]</sup> and the cross-coupling was conducted following the general procedure. The product was isolated as a yellow solid in 72% yield. m.p. =

164.5–165.4 °C;  $R_f$  = 0.43 (petroleum ether/ethyl acetate/acetic acid = 6:1:0.01). IR (cm<sup>-1</sup>, KBr): 3421, 3066, 1692, 1600, 1435, 766; <sup>1</sup>H NMR (CDCl<sub>3</sub>, 400 MHz) (ppm) 8.32 (s, 1H), 7.57–7.53 (m, 3H), 7.46–7.42 (m, 3H); <sup>13</sup>C NMR (CDCl<sub>3</sub>, 100 MHz) (ppm) 167.7, 167.1, 136.5, 134.4, 131.1, 129.7, 129.5, 127.2, 126.4, 125.4, 124.7, 124.1, 115.2, 110.7. Anal. Calcd. for C<sub>14</sub>H<sub>8</sub>F<sub>4</sub>O<sub>2</sub>: C, 59.16; H, 2.84. Found: C, 59.12; H, 2.86. MS (ESI): [M+H]<sup>+</sup> (m/z 285).

#### 6-Fluoro-2'-(trifluoromethyl)-[1, 1'-biphenyl]-3-carboxylic acid (4nf)

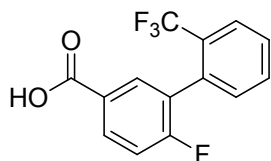

4-Fluorobenzoic acid was lithiated at C3 using using TMPLi at according to the literature<sup>[25]</sup> and the cross-coupling was conducted following the general procedure. The product was isolated as a yellow solid in 69% yield (950 mg), m.p. = 177.7–178.2 °C;  $R_f$  = 0.41 (petroleum ether/ethyl acetate/acetic acid = 6:1:0.01). IR (cm<sup>-1</sup>, KBr): 3435, 3095, 1686, 1593, 1265, 767; <sup>1</sup>H NMR (CDCl<sub>3</sub>, 400 MHz) (ppm) 11.52 (br s, 1H), 8.17–8.08 (m, 3H), 7.46 (t,  $J$  = 6.4 Hz, 2H), 7.16–7.11 (m, 2H); <sup>13</sup>C NMR (CDCl<sub>3</sub>, 100 MHz) (ppm) 169.2, 164.0, 131.4, 131.3, 130.6, 130.0, 129.6, 128.0, 127.7, 127.6, 127.3, 126.2, 124.0, 114.7. Anal. Calcd. for C<sub>14</sub>H<sub>8</sub>F<sub>4</sub>O<sub>2</sub>: C, 59.16; H, 2.84. Found: C, 59.21; H, 2.77. MS (ESI): [M+H]<sup>+</sup> (m/z 285).

#### 4'-(Trifluoromethyl)-[1, 1'-biphenyl]-2-carboxylic acid (Xenalipin)

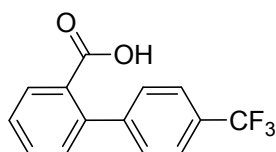

As described in **3aa**, the product was isolated as a white solid in 77% yield. m.p. = 165.7–166.2 °C (lit. 165–166 °C);  $R_f$  = 0.41 (petroleum ether/ethyl acetate/acetic acid = 5:1:0.01). IR (cm<sup>-1</sup>, KBr): 3399, 3070, 1686, 1452, 1321, 1066, 708; <sup>1</sup>H NMR (CDCl<sub>3</sub>, 400 MHz) (ppm) 10.41 (br s, 1H), 8.12–7.92 (m, 2H), 7.67–7.60 (m, 2H), 7.52–7.44 (m, 3H), 7.35–7.33(m, 1H); <sup>13</sup>C NMR (CDCl<sub>3</sub>, 100 MHz) (ppm) 172.2, 142.4, 133.9, 132.5, 131.2, 130.2, 129.2, 128.9, 128.5, 128.0, 125.02–124.93 (q), 119.5. Data was consistent with that reported in the literature.<sup>[26]</sup>

## 2-(3, 5-Dichlorophenyl)benzo[d]oxazole-6-carboxylic acid (Tafamidis)

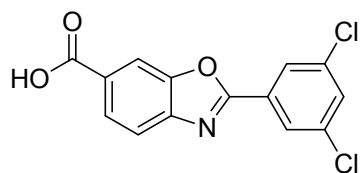

Benzo[d]oxazole-6-carboxylic acid was lithiated at C2 using 3 equiv. TMPLi at  $-50^{\circ}\text{C}$  according to the reported procedure and the product was isolated as a white solid in 61% yield. m.p. =  $200.4\text{--}202.7^{\circ}\text{C}$ ;  $R_f = 0.37$  (petroleum ether/ethyl acetate/acetic acid = 6:1:0.01). IR ( $\text{cm}^{-1}$ , KBr): 3383, 1685, 1608, 1224, 769;  $^1\text{H}$  NMR (DMSO- $d_6$ , 400 MHz) (ppm) 8.27 (s, 1H), 8.18 (d,  $J = 6.8$  Hz, 1H), 8.04–8.02 (m, 1H), 7.94 (s, 1H), 7.88 (d,  $J = 1.6$  Hz, 1H), 7.67 (dd,  $J = 6.8$  Hz, 5.2 Hz, 1H);  $^{13}\text{C}$  NMR (DMSO- $d_6$ , 100 MHz) (ppm) 167.2, 162.1, 150.1, 145.0, 137.8, 133.7, 131.4, 128.6, 126.8, 124.3, 120.5, 112.6. Data was consistent with that reported in the literature.<sup>[27]</sup>

## 5-(*p*-Tolyl)furan-2-carboxylic acid (5)

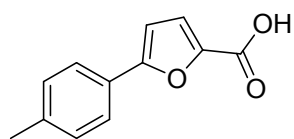

Furan-2-carboxylic acid was lithiated at C5 using LDA according to the literature<sup>[28]</sup> The product was isolated as a white solid in 88% yield (888 mg), m.p. =  $184.6\text{--}185.2^{\circ}\text{C}$  (lit.  $185\text{--}186^{\circ}\text{C}$ );  $R_f = 0.42$  (petroleum ether/ethyl acetate/acetic acid = 5:1:0.01). IR ( $\text{cm}^{-1}$ , KBr): 3445, 3024, 1664, 1485, 1165, 806, 758;  $^1\text{H}$  NMR (DMSO- $d_6$ , 400 MHz) (ppm) 13.07 (br s, 1H), 7.70 (d,  $J = 6.4$  Hz, 2H), 7.31–7.28 (m, 3H), 7.07 (d,  $J = 2.8$  Hz, 1H), 2.34 (s, 3H);  $^{13}\text{C}$  NMR (DMSO- $d_6$ , 100 MHz) (ppm) 159.8, 157.0, 144.2, 139.1, 130.1, 127.0, 124.8, 120.4, 107.7, 21.4. Data was consistent with that reported in the literature.<sup>[29]</sup>



## Reference

- [1] Krasovskiy, A.; Knochel, P. *Angew. Chem. Int. Ed.*, **2004**, *43*, 3333.
- [2] Krasovskiy, A.; Knochel, P. *Synthesis*, **2006**, *5*, 890.
- [3] Mortier, J.; Moyroud, J. *J. Org. Chem.* **1994**, *59*, 4042.
- [4] Zhu, C.; Zhang, Y.; Kan, J.; Zhao, H.; Su, W. *Org. Lett.* **2015**, *17*, 3418.
- [5] Wang, C.; Rakshit, S.; Glorius, F. *J. Am. Chem. Soc.*, 2010, *132*, 14006.
- [6] Li, Y.; Ding, Y.-J.; Wang, J.-Y.; Su, Y.-M.; Wang, X.-S. *Org. Lett.* **2013**, *15*, 2574.
- [7] Tao, B.; Goel, S. C.; Singh, J.; Boykin, D. W. *Synthesis* **2002**, 1043.
- [8] Gallardo-Donaire, J.; Martin, R. *J. Am. Chem. Soc.* **2013**, *135*, 9350.
- [9] Pernerstorfer, J.; Kleemann, H.-W.; Schaefer, M.; Safarova, A.; Patek, M. WO 2011053948 (2011)
- [10] Bolliger, J. L.; Frech, C. M. *Chem. Eur. J.* **2010**, *16*, 11072.
- [11] Bernini, R.; Cacchi, S.; Fabrizi, G.; Forte, G.; Petrucci, F.; Prastaro, A.; Niembro, S.; Shafir, A.; Vallribera, A. *Green Chem.* **2010**, *12*, 150.
- [12] Porcelloni, M.; D'Andrea, P.; Rossi, C.; Sisto, A.; Ettore, A.; Madami, A.; Altamura, M.; Giuliani, S.; Meini, S.; Fattori, D. *ChemMedChem* **2008**, *3*, 1048.
- [13] Aldous, D. J.; Smith, G. F.; Astles, P. C.; Pickett, S. D.; McLay, I. M.; Stuttle, K. A. J.; Ratcliffe, A. J. WO 9703967.
- [14] Nguyen, T. H.; Chau, N. T. T.; Castanet, A.-S.; Nguyen, K. P. P.; Mortier, J. *J. Org. Chem.* **2007**, *72*, 3419.
- [15] Fukuyama, T.; Maetani, S.; Miyagawa, K.; Ryu, I. *Org. Lett.* **2014**, *16*, 3216.
- [16] Gohier, F.; Mortier, J. *J. Org. Chem.* **2003**, *68*, 2030.
- [17] Gohier, F.; Castanet, A.-S.; Mortier, J. *Org. Lett.* **2003**, *5*, 1919.
- [18] Tilly, D.; Samanta, S. S.; Castanet, A.-S.; De, A.; Mortier, J. *Eur. J. Org. Chem.* **2006**, 174.
- [19] Mongin, F.; Trecourt, F.; Queguiner, G. *Tetrahedron Lett.* **1999**, *40*, 5483.
- [20] Vinayak, A.; Sudha, M.; Lalita, K. S.; Kumar, R. P. *World J. Pharm. Res.* **2014**, *3*, 525.
- [21] DuPriest, M. T.; Schmidt, C. L.; Kuzmich, D.; Williams, B. S. *J. Org. Chem.* **1986**, *51*, 2021
- [22] Knight, D. W.; Nott, A. P. *J. Chem. Soc., Perkin Trans. 1* **1983**, 791.

- [23] Noguchi, T.; Hasegawa, M.; Tomisawa, K.; Mitsukuchi, M. *Bioorg. Med. Chem.* **2003**, *11*, 4729.
- [24] Fink, C. A.; Ksander, G. M.; Kukkola, P. J.; Wallace, E. M.; Prashad, M. US6197798 (2001)
- [25] Gohier, F.; Castanet, A.-S.; Mortier, J. *J. Org. Chem.* **2005**, *70*, 1501.
- [26] Korolev, D. N.; Bumagin, N. A. *Tetrahedron Lett.* **2006**, *47*, 4225.
- [27] Yamamoto, T.; Muto, K.; Komiyama, M.; Canivet, J.; Yamaguchi, J.; Itami, K. *Chem. Eur. J.* **2011**, *17*, 10113.
- [28] Knight, D. W.; Nott, A. P. *J. Chem. Soc., Perkin Trans. I* **1981**, 1125.
- [29] S. Lee, K. Y. Yi, S. K. Hwang, B. H. Lee, S. Yoo, K. Lee, *J. Med. Chem.* **2005**, *48*, 2882.

## V. Copies of $^1\text{H}$ NMR and $^{13}\text{C}$ NMR spectra

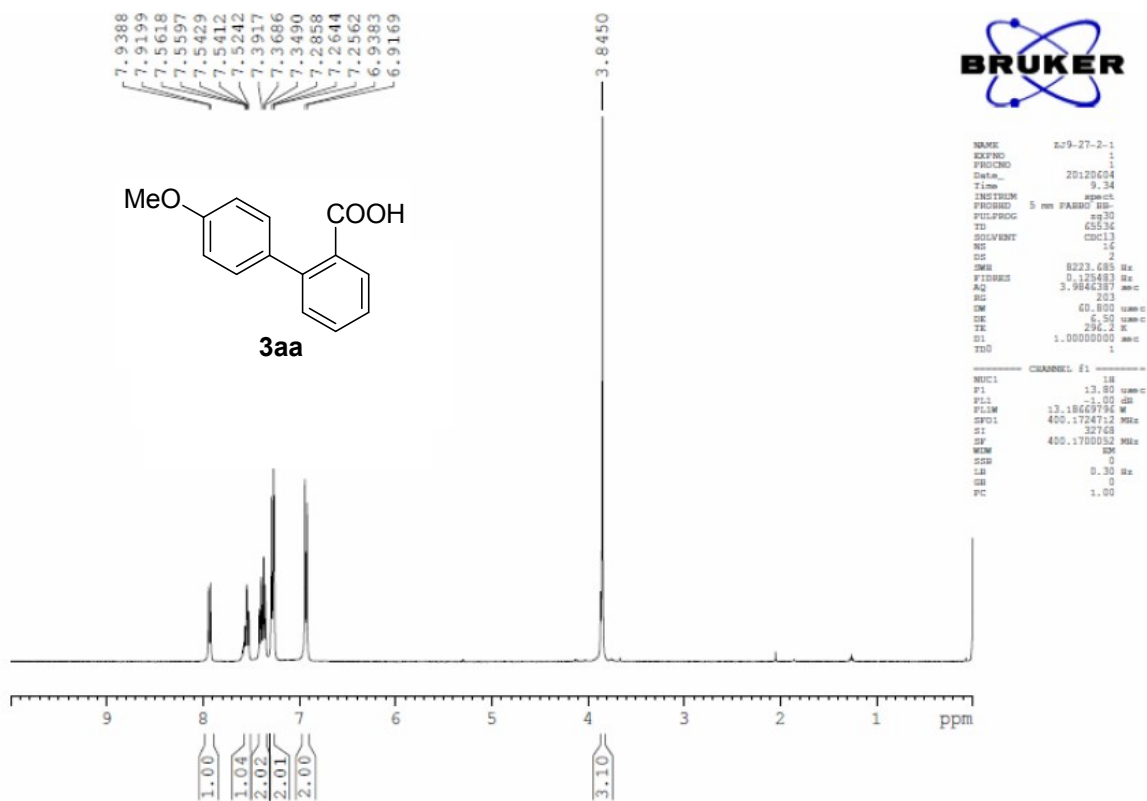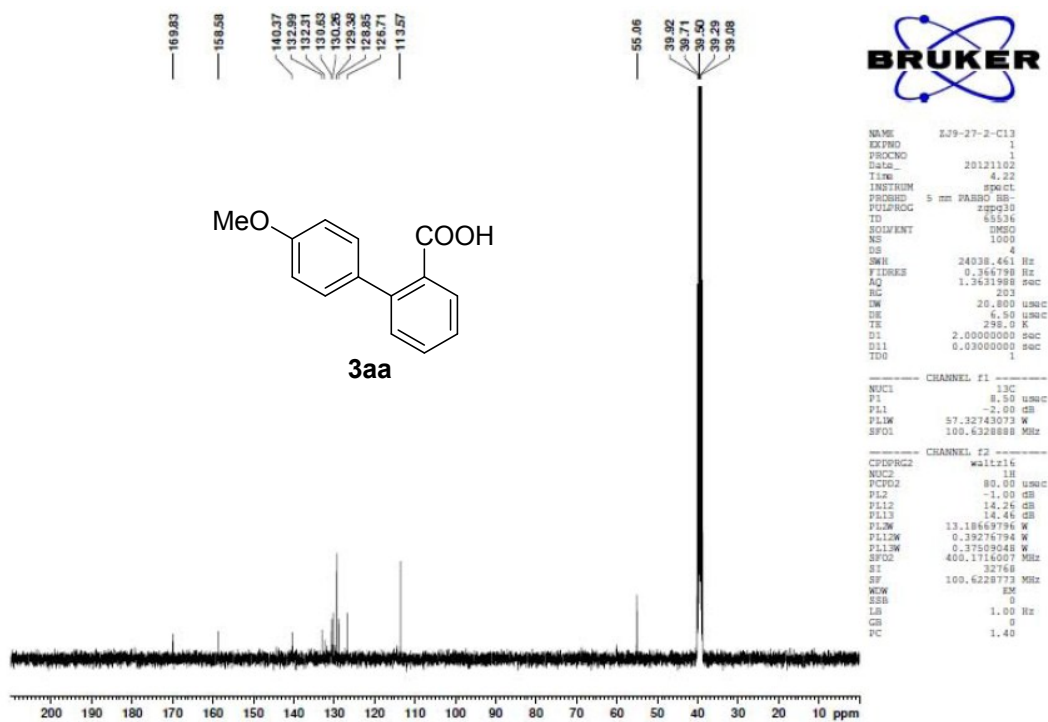

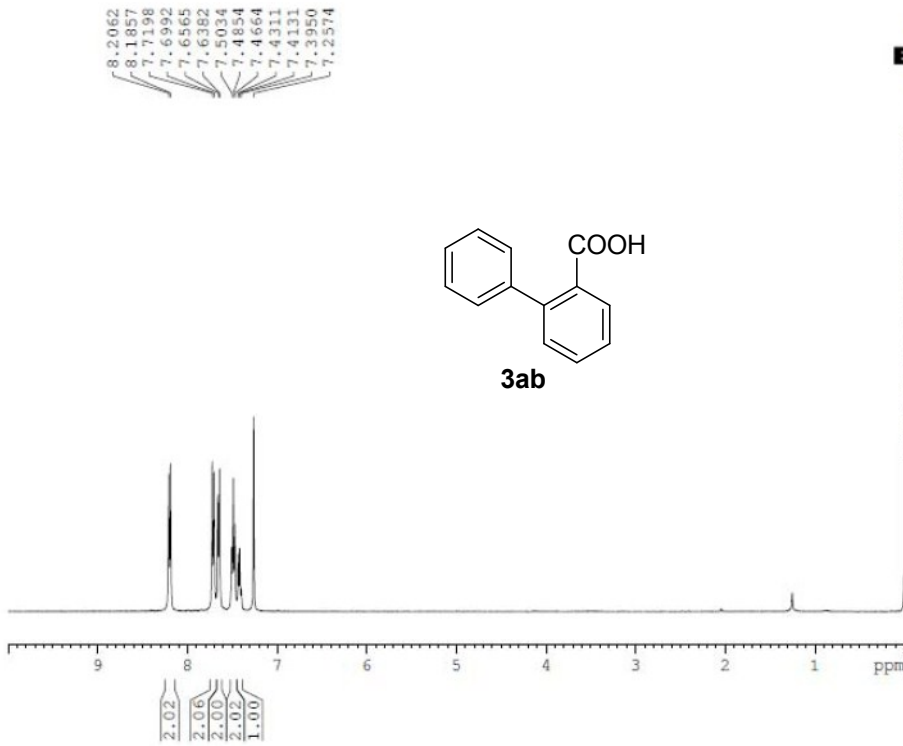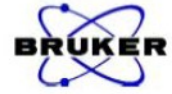

```

NAME      2J9-28-1
EXPNO     1
PROCNO    1
Date_     20120529
Time      10.15
INSTRUM   spect
PROBHD    5 mm PABBO BB-
PULPROG   zgpg30
TD         65536
SOLVENT   CDCl3
NS         14
DS         2
SWH        8223.045 Hz
FIDRES    0.125483 Hz
AQ         3.9846387 sec
RG         203
DM         60.800 usec
DE         6.50 usec
TE         297.5 K
SF         400.1700045 MHz
D1         1.00000000 sec
D11        1
----- CHANNEL f1 -----
NUC1       13C
P1         13.80 usec
PL1        0.00 dB
PL12       13.18669796 W
PL13       13.18669796 W
SFO1       400.1700045 MHz
SI         32768
SF         400.1700045 MHz
WDW        EM
SSB        0
LB         0.30 Hz
GB         0
PC         1.00
  
```

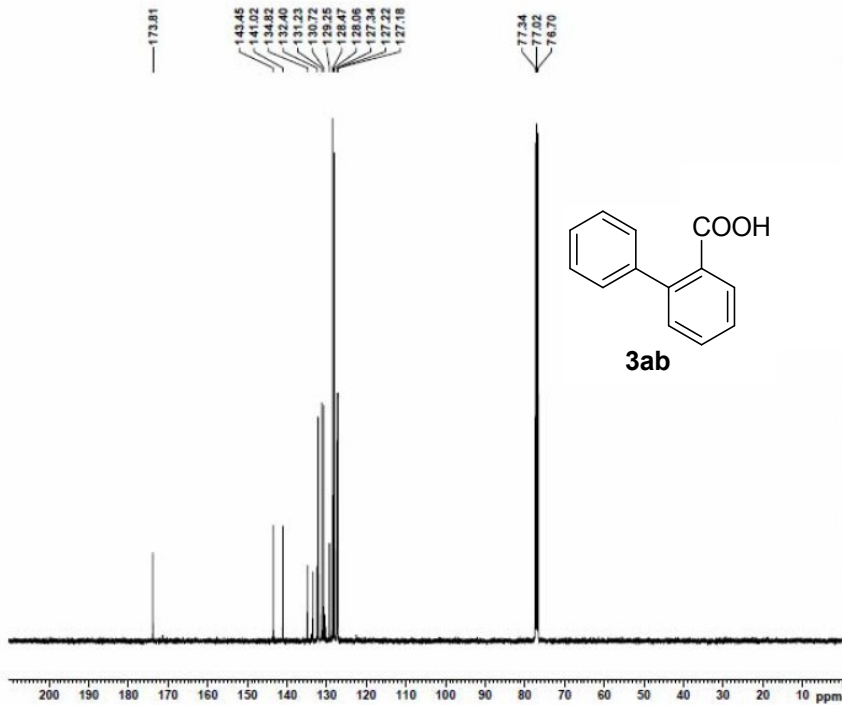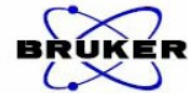

```

NAME      2J9-28-2-c13
EXPNO     1
PROCNO    1
Date_     20121018
Time      4.32
INSTRUM   spect
PROBHD    5 mm PABBO BB-
PULPROG   zgpg30
TD         65536
SOLVENT   CDCl3
NS         1000
DS         4
SWH        24038.461 Hz
FIDRES    0.366798 Hz
AQ         1.3631988 sec
RG         203
DM         20.800 usec
DE         6.50 usec
TE         300.0 K
SF         2.00000000 sec
D1         0.03000000 sec
D11        1
----- CHANNEL f1 -----
NUC1       13C
P1         8.50 usec
PL1        -2.00 dB
PL12       57.32742073 W
PL13       100.6328888 MHz
----- CHANNEL f2 -----
CPDPRG02  waitz16
NUC2       1H
PCPD02    80.00 usec
PL2        -1.00 dB
PL12       14.24 dB
PL13       14.44 dB
PL2W       13.18669796 W
PL12W      0.39276796 W
PL13W      0.37509248 W
SFO2       400.1716007 MHz
SI         32768
SF         100.6328295 MHz
WDW        EM
SSB        0
LB         1.00 Hz
GB         0
PC         1.40
  
```

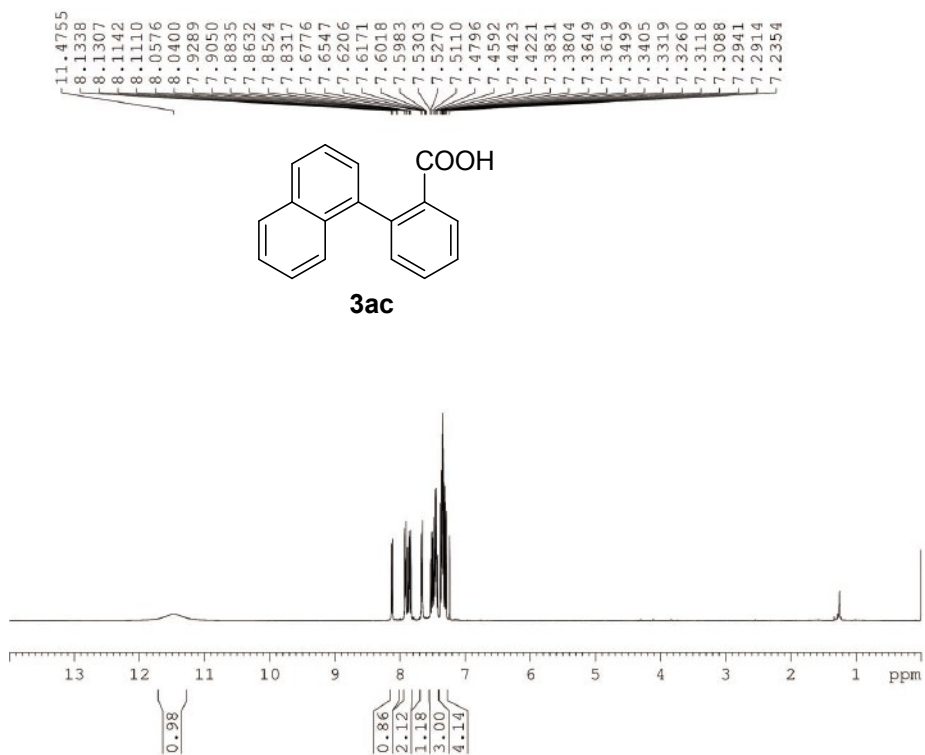

```

NAME      1km2014-4-16-3
EXPNO    1
PROCNO   1
Date_    20140416
Time     11.19
INSTRUM  spect
PROBHD   5 mm PABBO BB/
PULPROG  zg30
TD        65536
SOLVENT  CDCl3
NS        16
DS        2
SMBH     8223.685 Hz
FIDRES   0.125483 Hz
AQ        3.9846387 sec
RG        328
DM        60.800 usec
DE        6.50 usec
TE        297.4 K
D1        1.0000000 sec
D11       1
TDO       1
----- CHANNEL f1 -----
NUC1      13C
P1        13.80 usec
PL1       0.00 dB
PL12      13.18669796 K
SFO1      400.172412 MHz
SI        32768
SF        400.1700127 MHz
RGW       0
SSB       0
LB        0.30 Hz
GB        0
PC        1.00
  
```

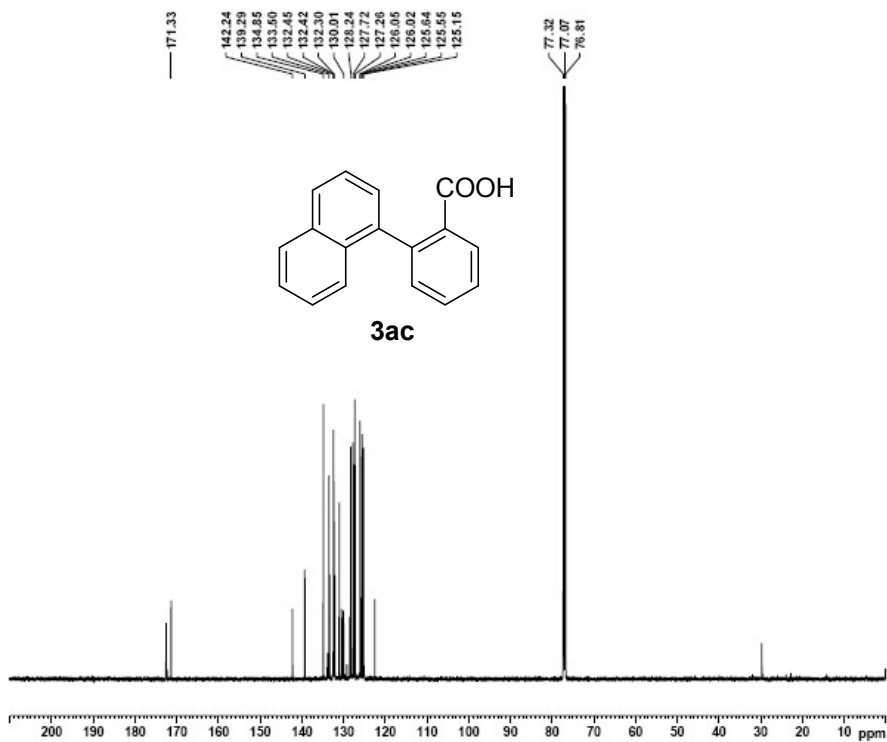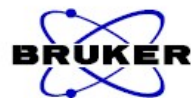

```

NAME      1km2014-4-16-3-C13
EXPNO    1
PROCNO   1
Date_    20140528
Time     6.13
INSTRUM  spect
PROBHD   5 mm PABBO BB/
PULPROG  zgpg30
TD        65536
SOLVENT  CDCl3
NS        1024
DS        4
SMBH     29761.904 Hz
FIDRES   0.454131 Hz
AQ        1.1010548 sec
RG        2050
DM        16.800 usec
DE        6.50 usec
TE        298.0 K
D1        2.0000000 sec
D11       0.0300000 sec
TDO       1
----- CHANNEL f1 -----
SFO1      125.7703637 MHz
NUC1      13C
P1        9.80 usec
SI        32768
SF        125.7577885 MHz
RGW       0
SSB       0
LB        1.00 Hz
GB        0
PC        1.40
  
```

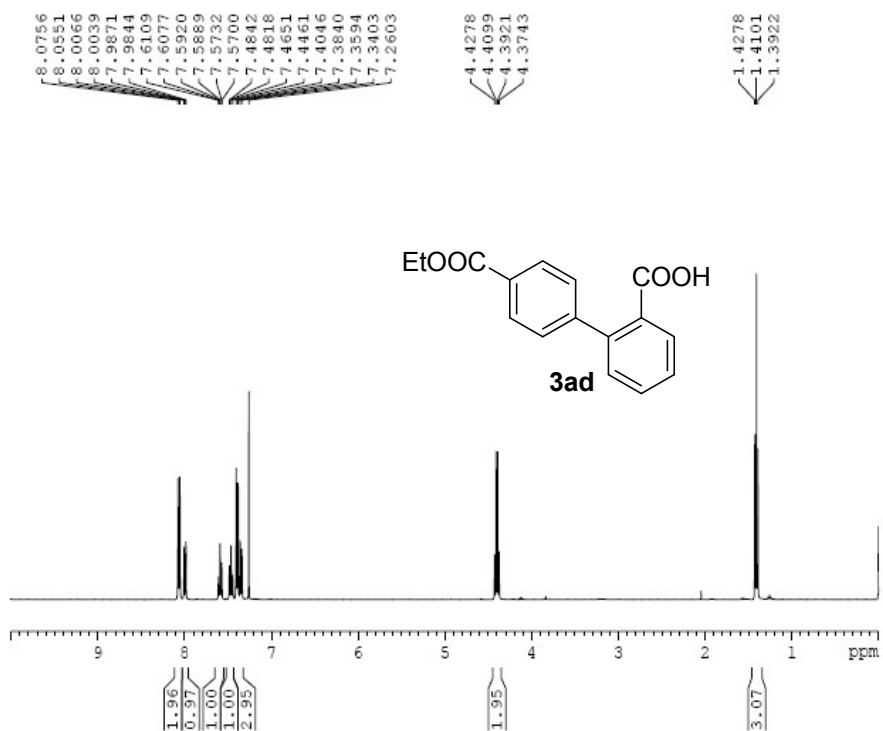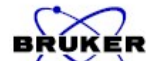

```

NAME LRM2014-11-27
EXPNO 1
PROCNO 1
Date_ 20141127
Time 16.19
INSTRUM spect
PROBHD 5 mm PABBO BB-
PULPROG zgpg30
TD 65536
SOLVENT cdcl3
NS 16
DS 2
SWH 9223.685 Hz
FIDRES 0.125483 Hz
AQ 1.986037 sec
RG 203
DM 60.000 usec
DE 6.50 usec
TE 294.4 K
D1 1.0000000 sec
TDO 1
----- CHANNEL f1 -----
NUC1 13C
P1 13.40 usec
PL1 -1.50 dB
PLM 13.18669794 W
SFO1 400.1724712 MHz
SI 32768
SF 400.1700037 MHz
KWB EM
SSB 0
LB 0.30 Hz
GB 0
PC 1.00

```

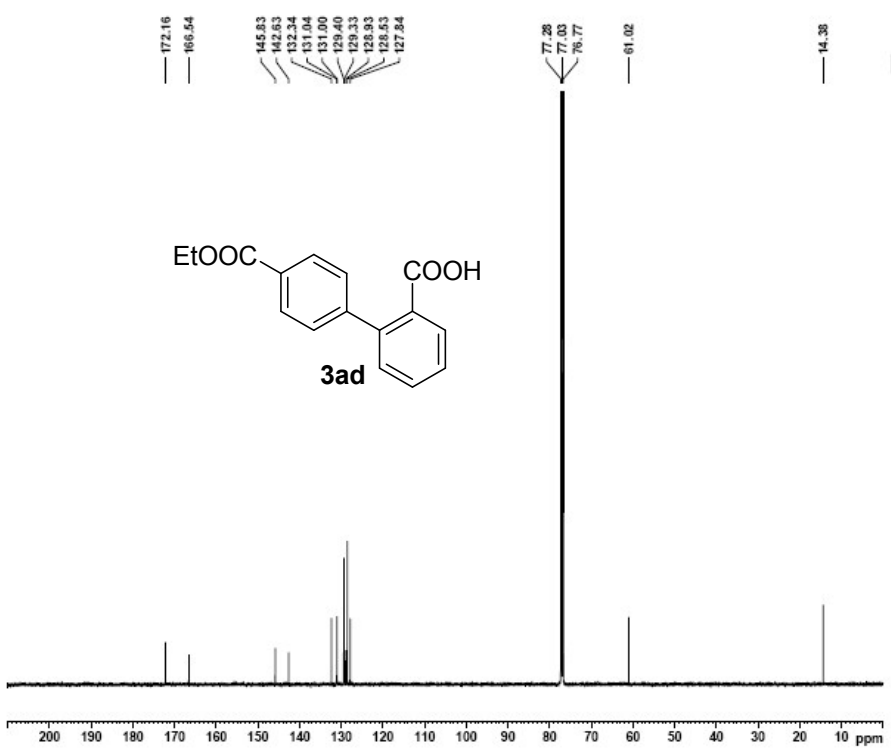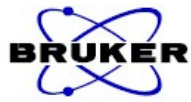

```

NAME LRM2014-11-27-C13
EXPNO 1
PROCNO 1
Date_ 20141210
Time 7.04
INSTRUM spect
PROBHD 5 mm PABBO BB/
PULPROG zgpg30
TD 65536
SOLVENT cdcl3
NS 1024
DS 4
SWH 29761.904 Hz
FIDRES 0.454131 Hz
AQ 1.1010548 sec
RG 2050
DM 16.800 usec
DE 6.50 usec
TE 298.0 K
D1 2.0000000 sec
D11 0.3300000 sec
TDO 1
----- CHANNEL f1 -----
SFO1 125.7703637 MHz
NUC1 13C
P1 9.80 usec
SI 32768
SF 125.7577885 MHz
KWB EM
SSB 0
LB 1.00 Hz
GB 0
PC 1.40

```

8.1330  
8.1146  
7.6288  
7.6248  
7.6152  
7.6117  
7.6075  
7.5977  
7.5837  
7.5805  
7.5030  
7.4835  
7.4644  
7.3482  
7.3300  
7.3120  
7.2793  
7.2604  
7.2561  
7.2428

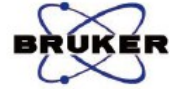

NAME LRM2014-9-26-1  
EXPNO 1  
PROCNO 1  
Date\_ 20140926  
Time\_ 11:52  
INSTRUM spect  
PROBHD 5 mm PABBO BB-  
PULPROG zgpg30  
TD 65536  
SOLVENT CDCl3  
NS 16  
DS 2  
SWH 823.065 Hz  
FIDRES 0.125483 Hz  
AQ 3.9846387 sec  
RG 203  
DM 60.800 usec  
DE 6.50 usec  
TE 298.5 K  
D1 1.0000000 sec  
TDO 1

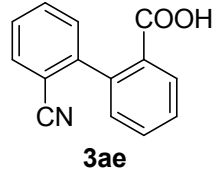

----- CHANNEL f1 -----  
NUC1 1H  
P1 13.80 usec  
PL1 -1.00 dB  
FLW 13.18669796 Hz  
SFO1 400.1724112 MHz  
SI 32768  
SF 400.1700006 MHz  
WDW EM  
SSB 0  
LB 0.30 Hz  
GB 0  
PC 1.00

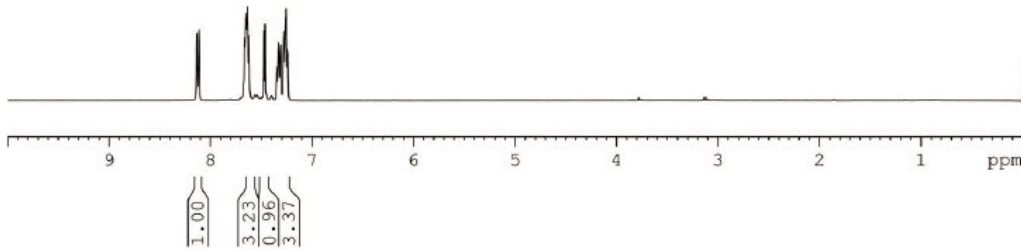

170.97  
134.95  
134.90  
133.69  
132.22  
132.14  
130.20  
130.00  
128.63  
128.54  
128.49  
127.90  
119.22  
117.55

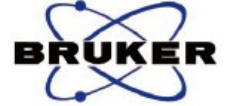

NAME LRM2014-9-26-1-C13  
EXPNO 1  
PROCNO 1  
Date\_ 20141029  
Time\_ 4:15  
INSTRUM spect  
PROBHD 5 mm PABBO BB/  
PULPROG zgpg30  
TD 65536  
SOLVENT CDCl3  
NS 1024  
DS 4  
SWH 29761.904 Hz  
FIDRES 0.454131 Hz  
AQ 1.1010548 sec  
RG 2050  
DM 16.800 usec  
DE 6.50 usec  
TE 298.0 K  
D1 2.0000000 sec  
D11 0.0300000 sec  
TDO 1

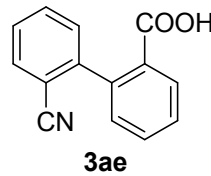

----- CHANNEL f1 -----  
SFO1 125.7703637 MHz  
NUC1 13C  
P1 9.80 usec  
SI 32768  
SF 125.7577885 MHz  
WDW EM  
SSB 0  
LB 1.00 Hz  
GB 0  
PC 1.40

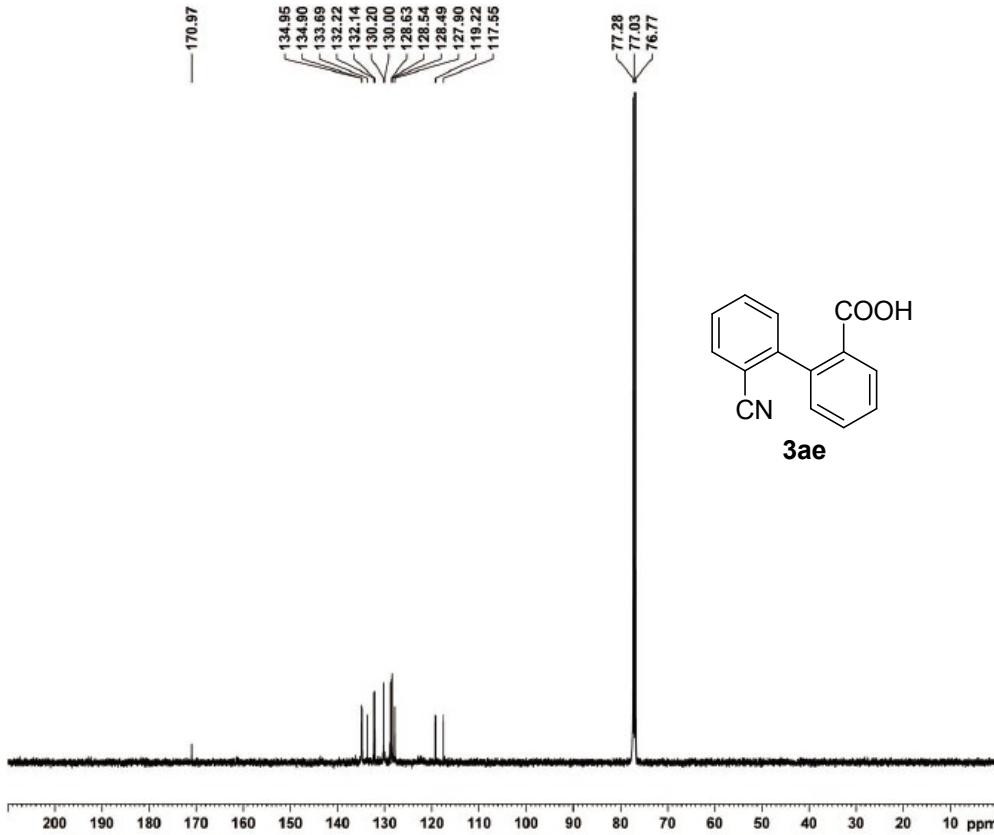

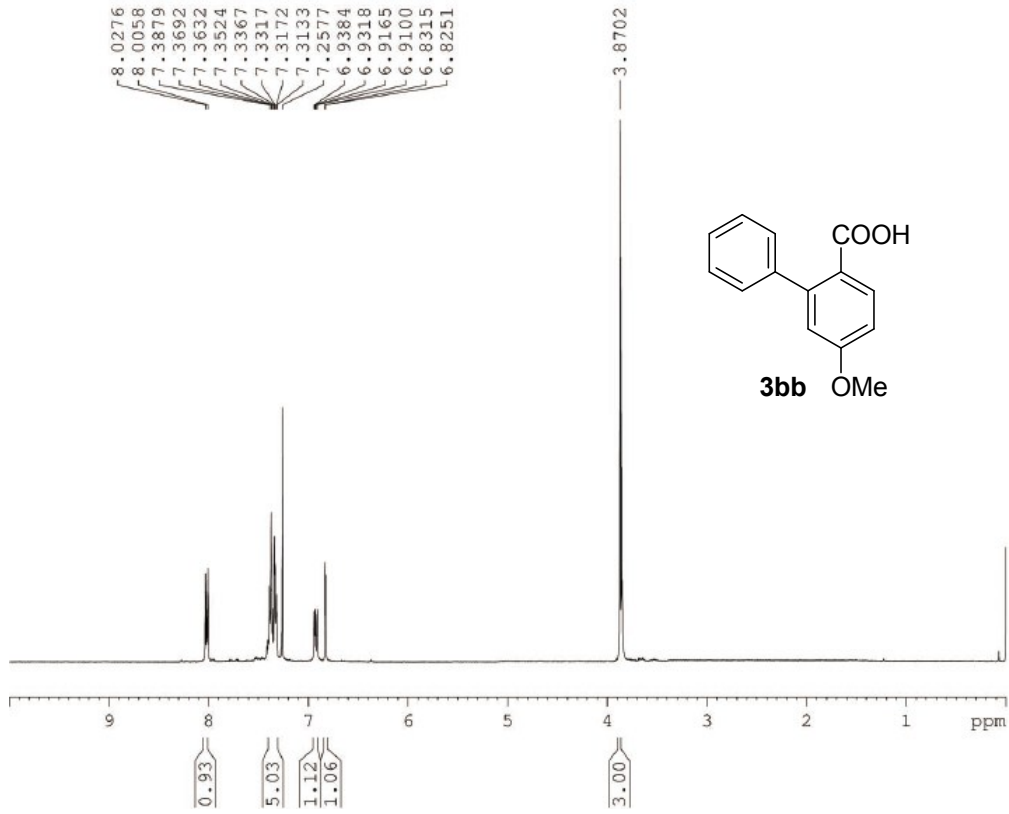

```

NAME LKM2014-9-12-2
EXPNO 1
PROCNO 1
Date_ 20140912
Time 9.38
INSTRUM spect
PROBHD 5 mm PABBO BB-
PULPROG zg30
TD 65536
SOLVENT CDCl3
NS 16
DS 2
SWH 8223.685 Hz
FIDRES 0.125483 Hz
AQ 3.9846387 sec
RG 203
DM 60.800 usec
DE 4.50 usec
TE 298.4 K
D1 1.00000000 sec
TDO 1

```

```

----- CHANNEL f1 -----
NUC1 1H
P1 13.80 usec
PL1 -1.00 dB
PL1W 13.18669796 W
SFO1 400.1724712 MHz
SI 32768
SF 400.1700048 MHz
WDW EM
SSB 0
LB 0.30 Hz
GB 0
PC 1.00

```

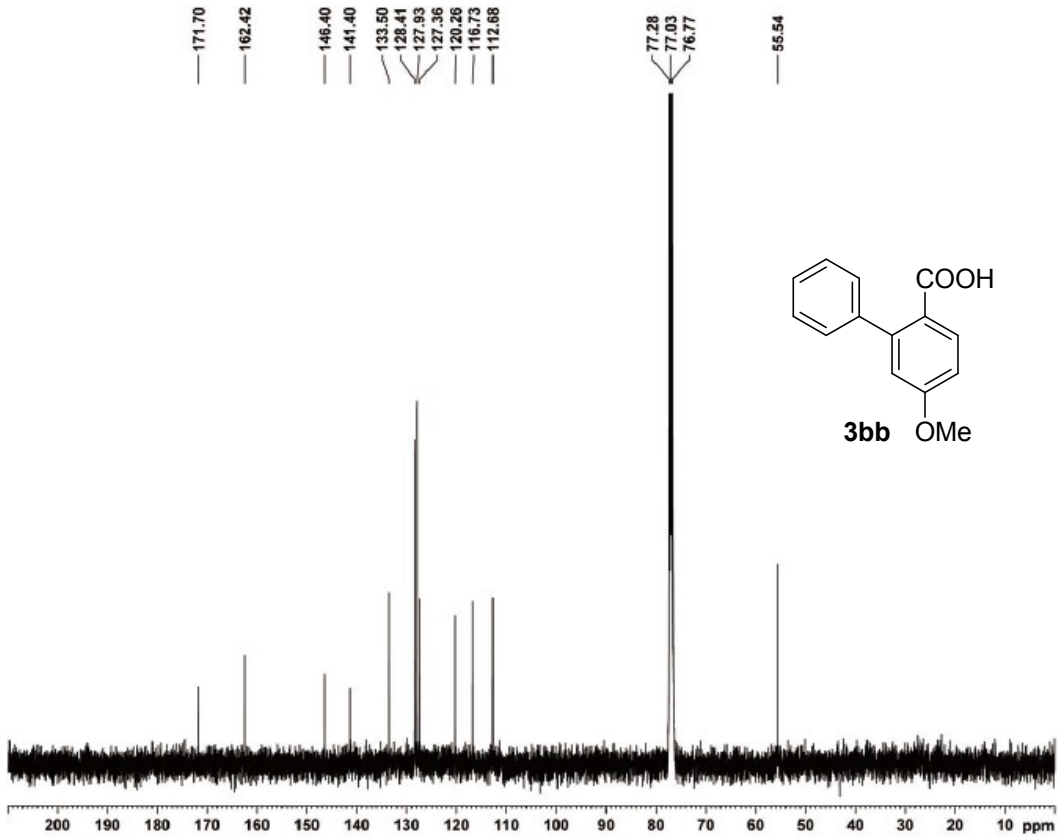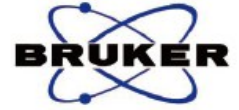

```

NAME LKM2014-9-12-2-C13
EXPNO 1
PROCNO 1
Date_ 20140912
Time 21.42
INSTRUM spect
PROBHD 5 mm PABBO BB/
PULPROG zgpg30
TD 65536
SOLVENT CDCl3
NS 1024
DS 4
SWH 29761.904 Hz
FIDRES 0.454131 Hz
AQ 1.1010548 sec
RG 2050
DM 16.800 usec
DE 6.50 usec
TE 298.0 K
D1 2.00000000 sec
D11 0.03000000 sec
TDO 1

```

```

----- CHANNEL f1 -----
SFO1 125.7703637 MHz
NUC1 13C
P1 9.80 usec
SI 32768
SF 125.7577885 MHz
WDW EM
SSB 0
LB 1.00 Hz
GB 0
PC 1.40

```



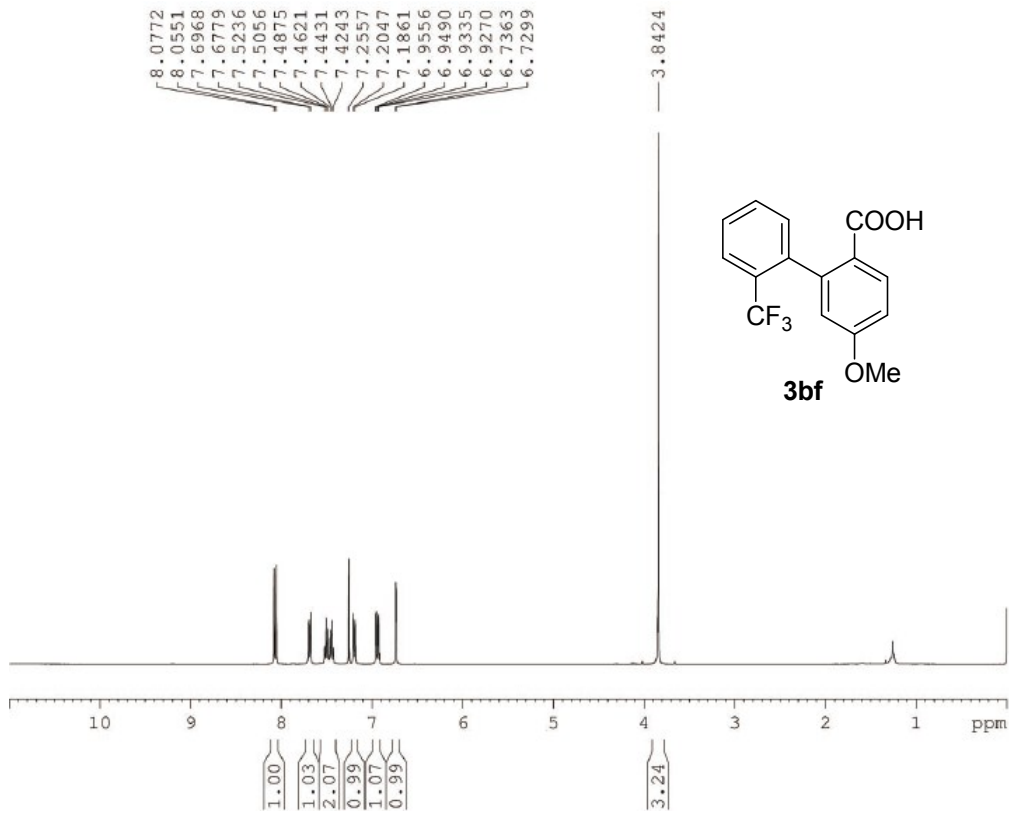

```

NAME LRM2014-4-16-7
EXPNO 1
PROCNO 1
Date_ 20140416
Time 11.40
INSTRUM spect
PROBHD 5 mm FAPBO BB-
PULPROG zg30
TD 65536
SOLVENT CDCl3
NS 16
DS 2
SWH 8223.685 Hz
FIDRES 0.125480 Hz
AQ 3.9846387 sec
RG 181
DM 60.800 usec
DE 6.50 usec
TE 297.6 K
D1 1.00000000 sec
TDO 1
----- CHANNEL f1 -----
NUC1 1H
P1 13.80 usec
PL1 -1.00 dB
PL1W 13.18689796 W
SFO1 400.1724712 MHz
SI 32768
SF 400.1700047 MHz
WOW EM
SSB 0
LB 0.30 Hz
GB 0
PC 1.00

```

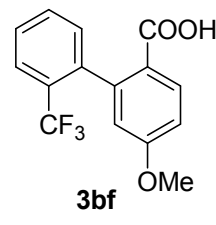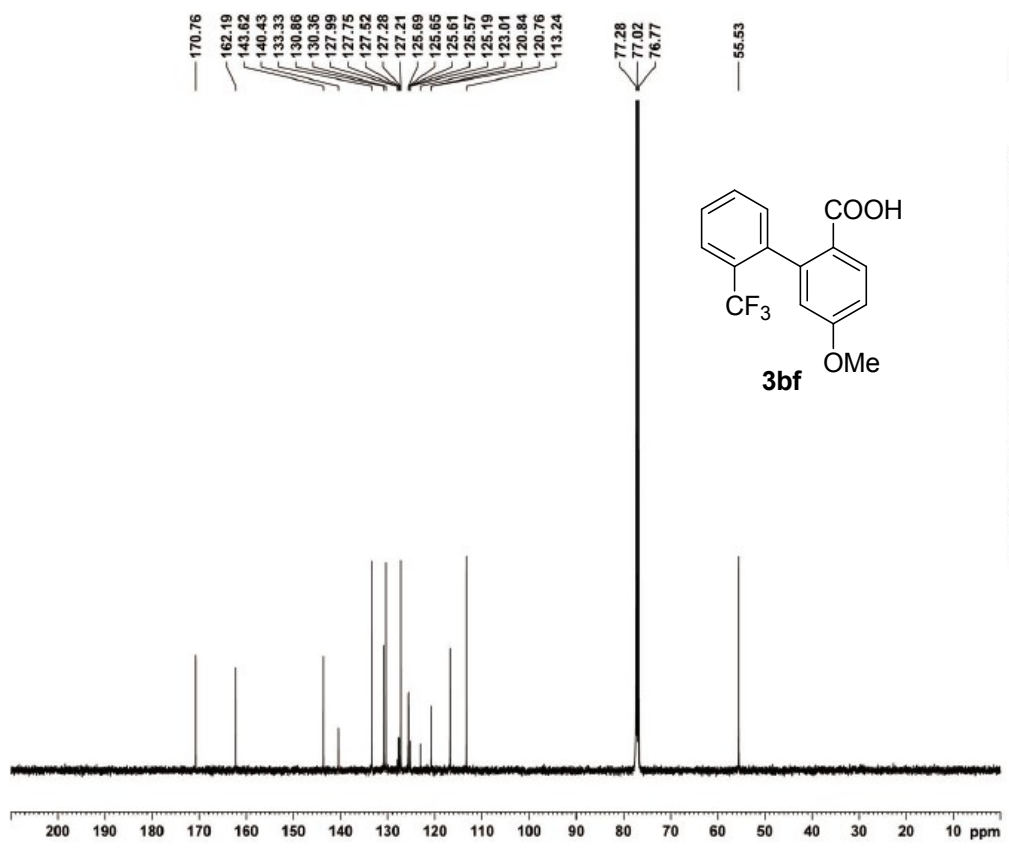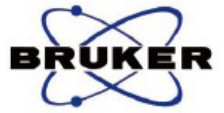

```

NAME LRM2014-4-16-7-C13
EXPNO 6
PROCNO 1
Date_ 20140528
Time 9.15
INSTRUM spect
PROBHD 5 mm FAPBO BB/
PULPROG zgpg30
TD 65536
SOLVENT CDCl3
NS 1024
DS 4
SWH 29761.904 Hz
FIDRES 0.454131 Hz
AQ 1.1010548 sec
RG 2050
DM 16.800 usec
DE 6.50 usec
TE 297.9 K
D1 2.00000000 sec
D11 0.03000000 sec
TDO 1
----- CHANNEL f1 -----
SFO1 125.7703637 MHz
NUC1 13C
P1 9.80 usec
PL1 32768
SF 125.7577885 MHz
WOW EM
SSB 0
LB 1.00 Hz
GB 0
PC 1.40

```

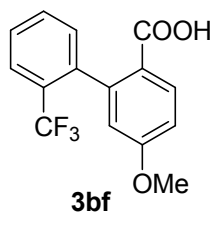

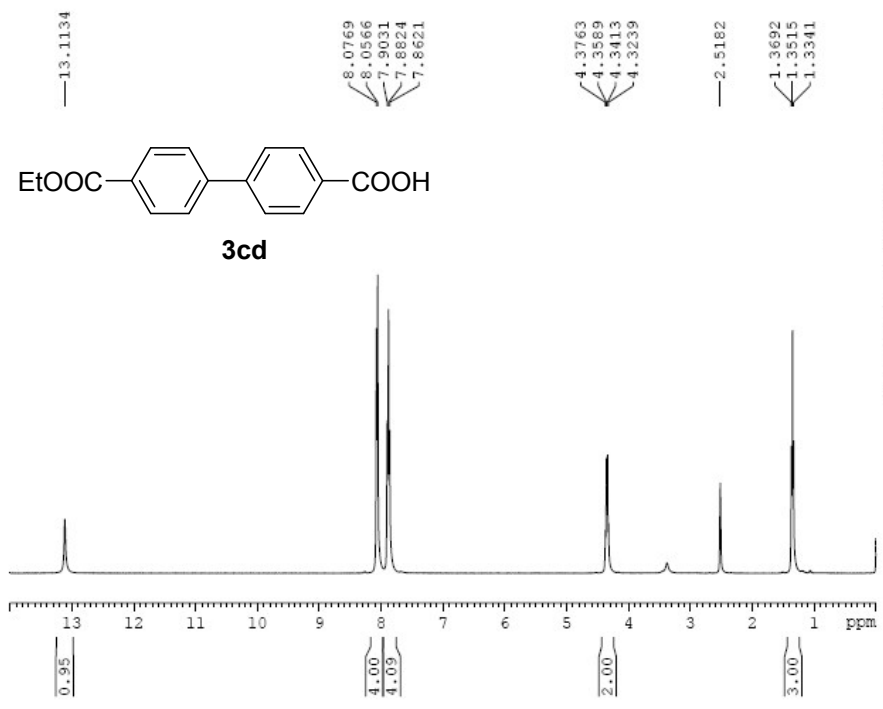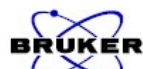

```

NAME LHM014-12-2-2
EXPNO 1
PROCNO 1
Date_ 20141202
Time 9.10
INSTRUM spect
PROBHD 5 mm PABBO BB-
PULPROG zgpg30
TD 65536
SOLVENT DMSO
NS 2
DS 4
SWH 8223.695 Hz
FIDRES 0.120483 Hz
AQ 1.9846387 sec
RG 256
DM 65.890 usec
DE 6.50 usec
TE 291.1 K
D1 1.00000000 sec
D11 1
D12 1
D13 1
D14 1
D15 1
D16 1
D17 1
D18 1
D19 1
D20 1
----- CHANNEL f1 -----
NUC1 1H
P1 13.00 usec
PL1 -1.00 dB
PL12 13.1669756 dB
SFO1 400.124712 MHz
SI 32768
SF 400.1699880 MHz
WDW EM
SSB 0
LB 0.30 Hz
GB 0
PC 1.00

```

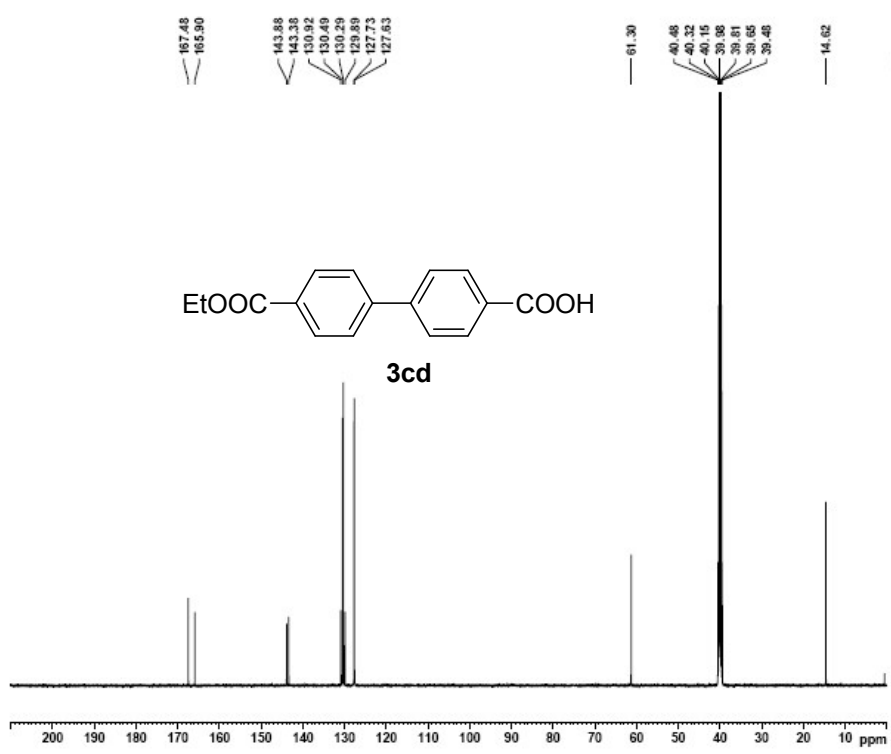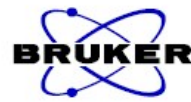

```

NAME LHM2014-12-2-2-C13
EXPNO 1
PROCNO 1
Date_ 20141210
Time 8.01
INSTRUM spect
PROBHD 5 mm PABBO BB/
PULPROG zgpg30
TD 65536
SOLVENT DMSO
NS 1024
DS 4
SWH 29761.904 Hz
FIDRES 0.454131 Hz
AQ 1.1010548 sec
RG 2050
DM 16.800 usec
DE 6.50 usec
TE 298.0 K
D1 2.00000000 sec
D11 0.03000000 sec
D12 1
D13 1
D14 1
D15 1
D16 1
D17 1
D18 1
D19 1
D20 1
----- CHANNEL f1 -----
SFO1 125.7703637 MHz
NUC1 13C
P1 9.80 usec
PL1 32768
SF 125.7577865 MHz
WDW EM
SSB 0
LB 1.00 Hz
GB 0
PC 1.40

```

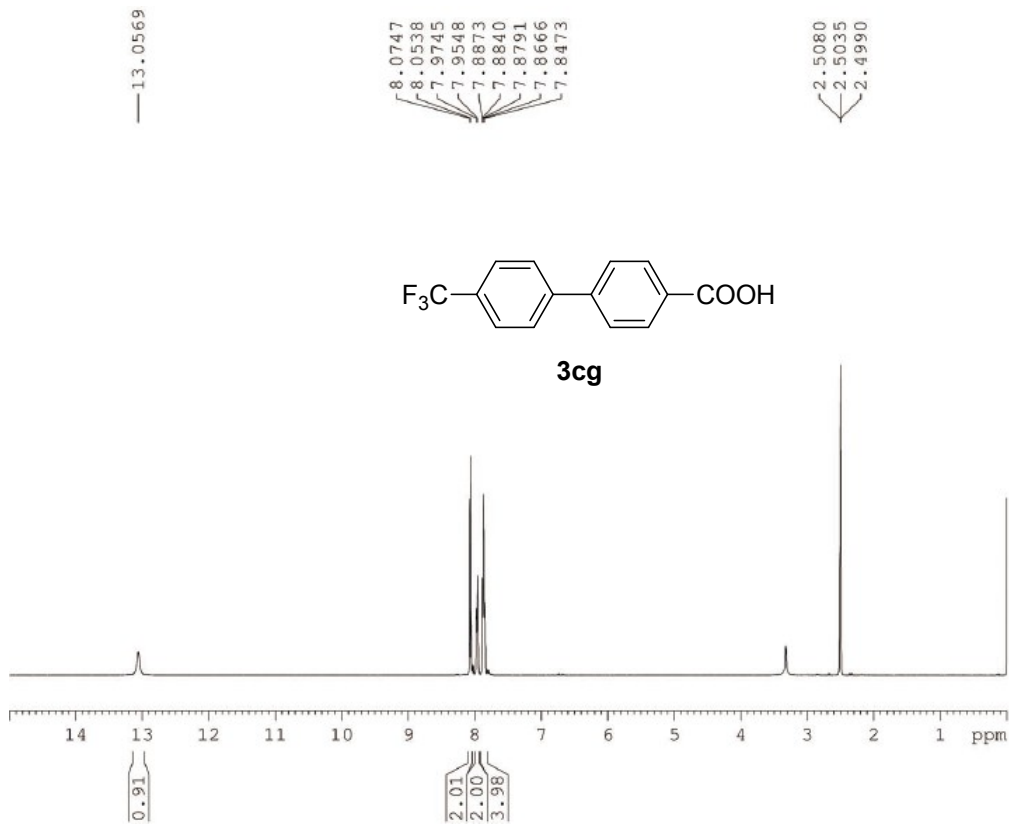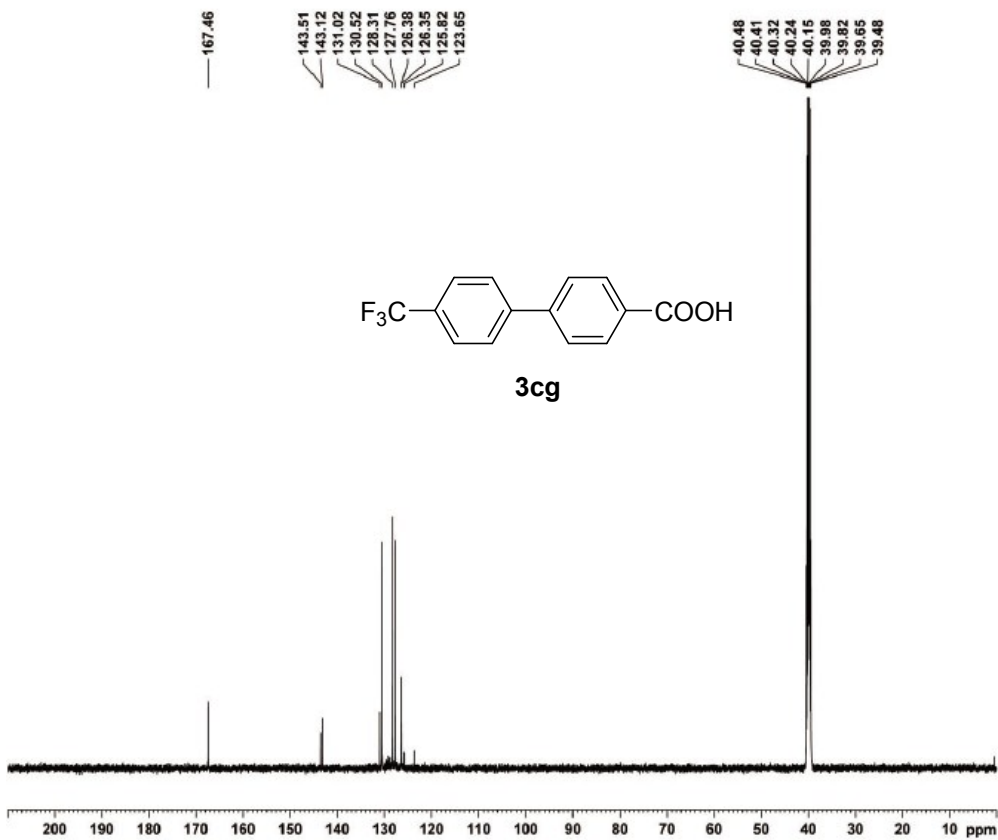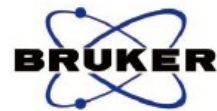

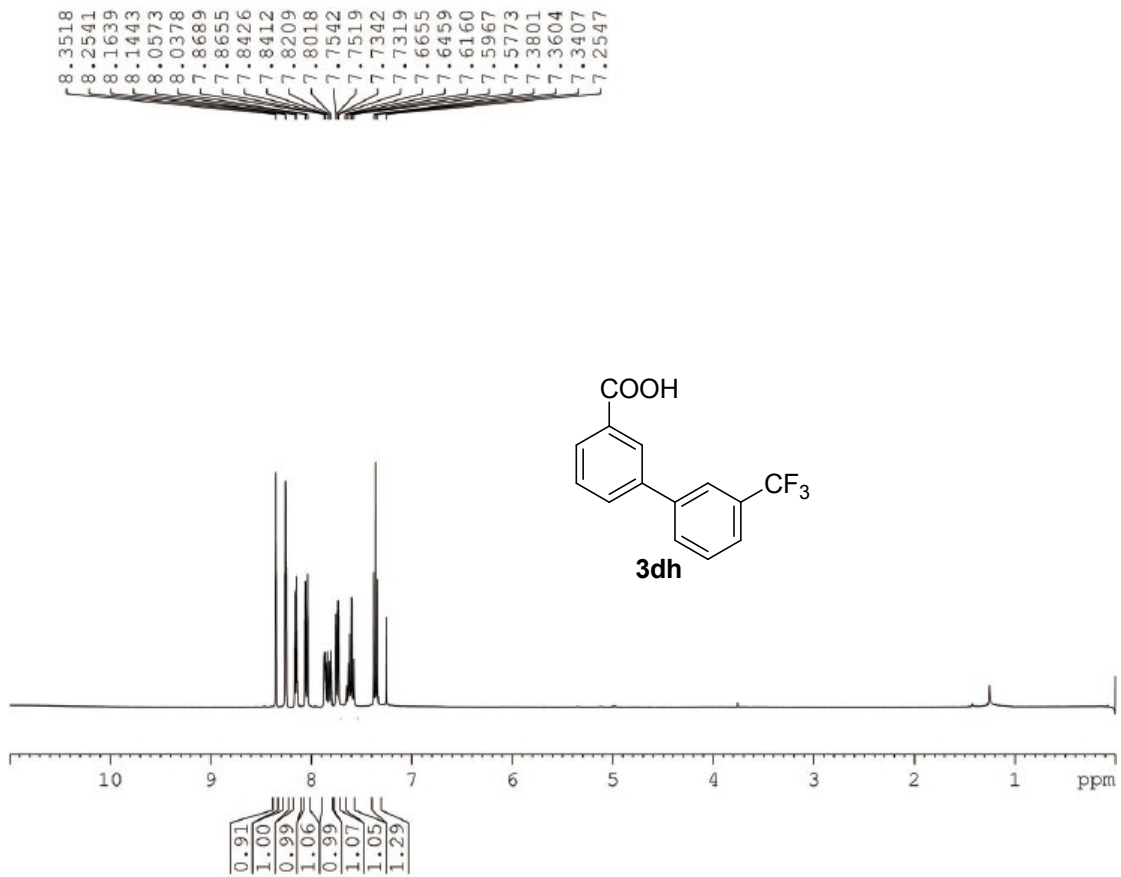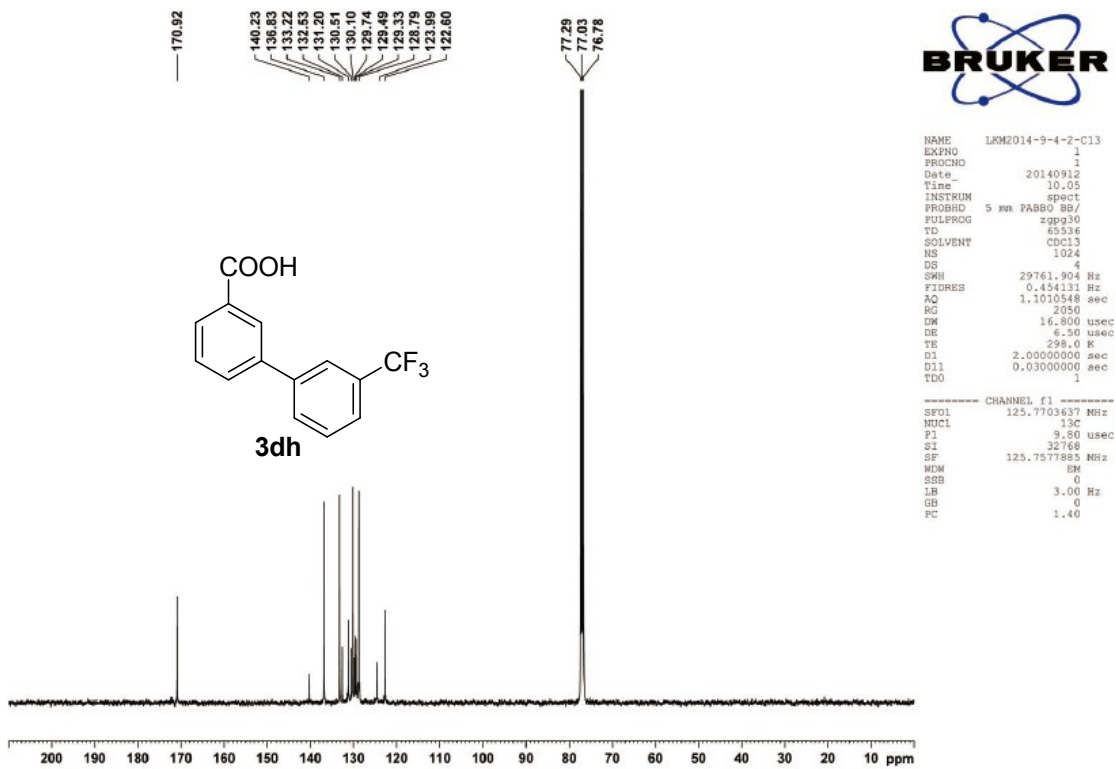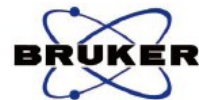

```

NAME      LRM2014-9-4-2-C13
EXPNO     1
PROCNO    1
Date_     20140912
Time      10.05
INSTRUM   spect
PROBHD    5 mm PABBO BB/
PULPROG   zgpg30
TD         65536
SOLVENT   CDCl3
NS         1024
DS         4
SWH        29761.904 Hz
FIDRES     0.454131 Hz
AQ         1.1010545 sec
RG         2050
DW         16.800 usec
DE         6.50 usec
TE         298.0 K
D1         2.0000000 sec
D11        0.0300000 sec
TDO        1

----- CHANNEL f1 -----
SF01      125.7703637 MHz
NUC1      13C
P1         9.80 usec
SI         32768
SF         125.7577885 MHz
WDW        EM
SSB        0
LB         3.00 Hz
GB         0
PC         1.40
  
```

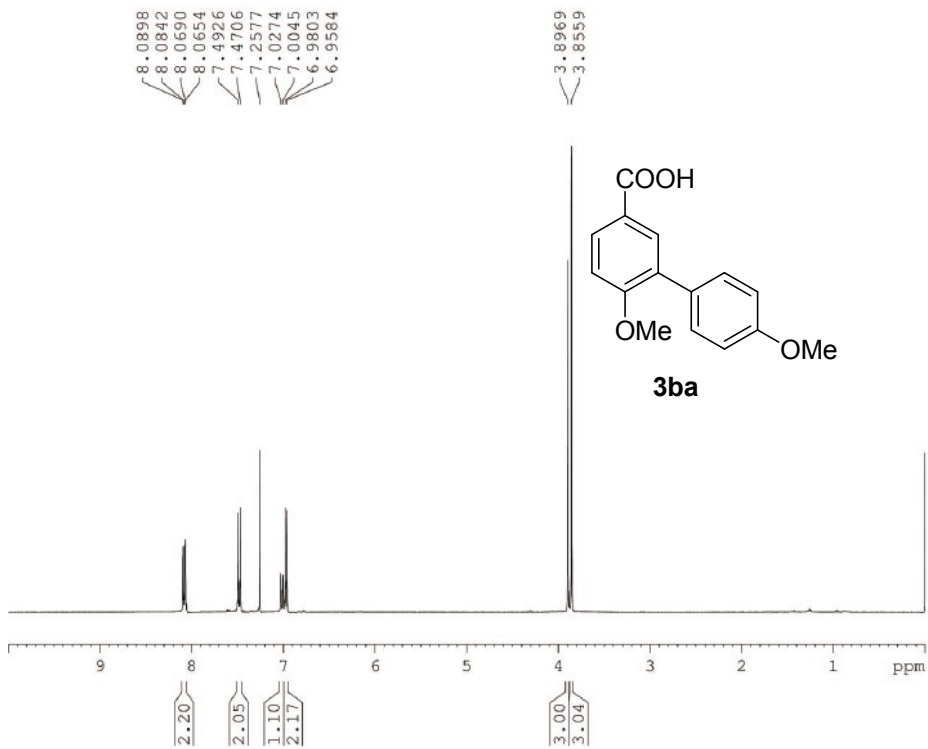

```

NAME LKM2014-9-1-7
EXPNO 1
PROCNO 1
Date_ 20140901
Time 15.22
INSTRUM spect
PROBHD 5 mm PABBO BB-
PULPROG zgpg30
TD 65536
SOLVENT CDCl3
NS 16
DS 2
SWH 8223.685 Hz
FIDRES 0.135483 Hz
AQ 3.9846387 sec
RG 203
DM 60.800 usec
DE 6.50 usec
TE 298.6 K
D1 1.00000000 sec
TDO 1
----- CHANNEL f1 -----
NUC1 1H
P1 13.80 usec
PL1 -1.00 dB
PLW 13.18689796 W
SFO1 400.1724712 MHz
SI 32768
SF 400.1700000 MHz
WDW EM
SSB 0
LB 0.30 Hz
GB 0
PC 1.00

```

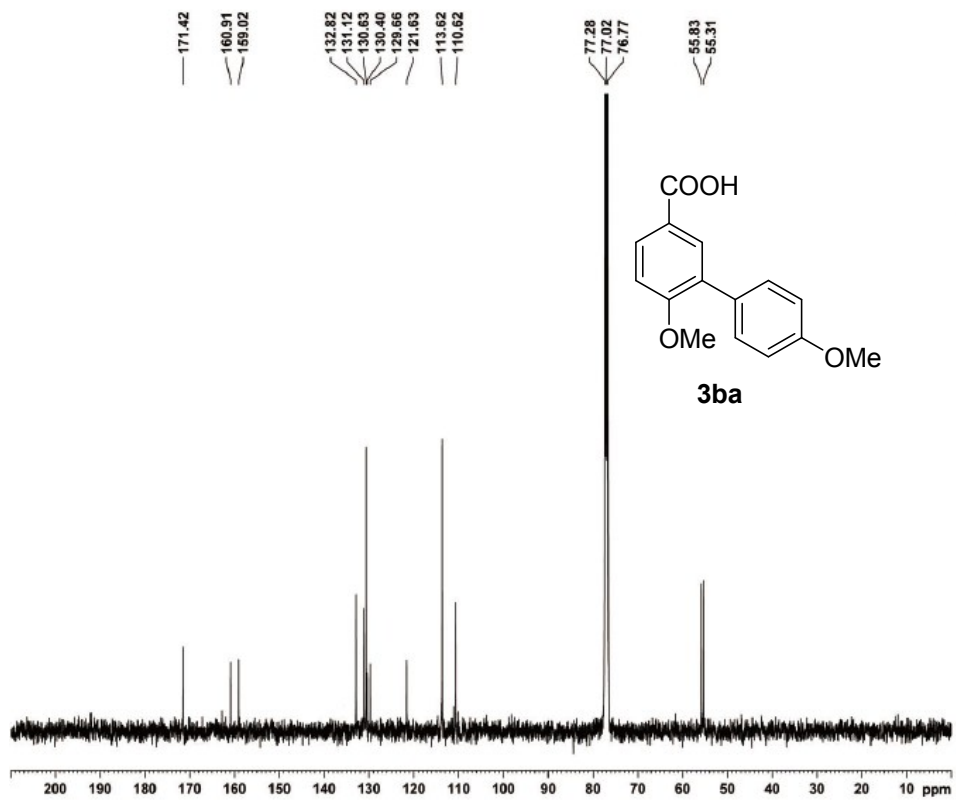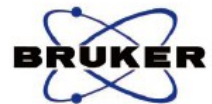

```

NAME LKM2014-9-1-7-C13
EXPNO 1
PROCNO 1
Date_ 20140903
Time 12.08
INSTRUM spect
PROBHD 5 mm PABBO BB-
PULPROG zgpg30
TD 65536
SOLVENT CDCl3
NS 1024
DS 4
SWH 29761.904 Hz
FIDRES 0.454131 Hz
AQ 1.1010548 sec
RG 2050
DM 16.800 usec
DE 6.50 usec
TE 297.4 K
D1 2.00000000 sec
D11 0.03000000 sec
TDO 1
----- CHANNEL f1 -----
SECT 125.7703637 MHz
NUC1 13C
P1 9.80 usec
SI 32768
SF 125.7577895 MHz
WDW EM
SSB 0
LB 3.00 Hz
GB 0
PC 1.40

```

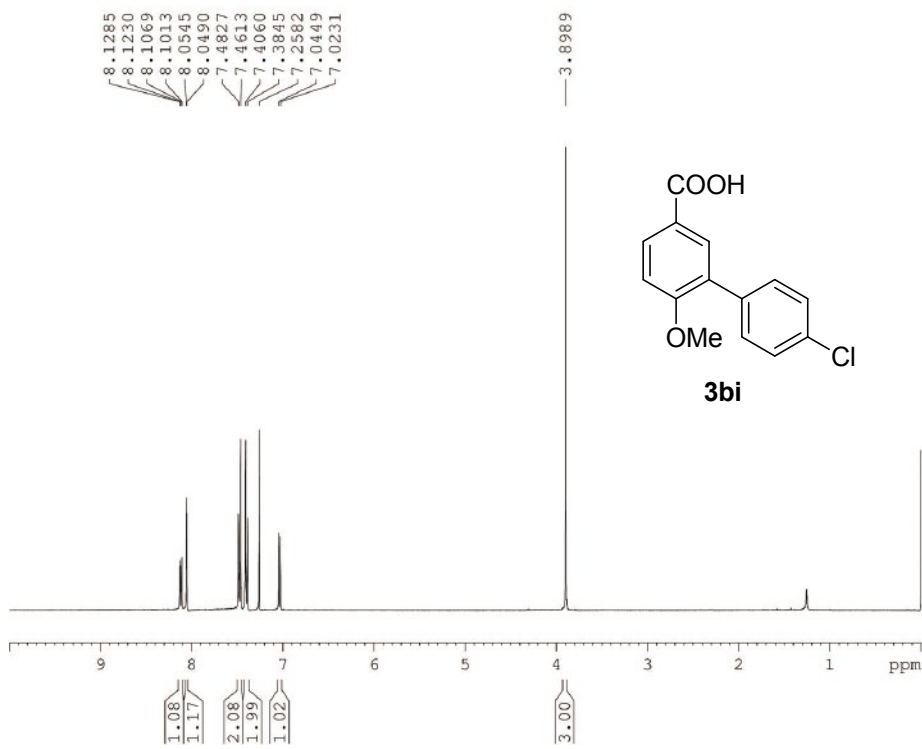

```

NAME LRM2014-9-1-8
EXPNO 1
PROCNO 1
Date_ 20140901
Time 15.45
INSTRUM spect
PROBHD 5 mm PABBO BB-
PULPROG zg30
TD 6536
SOLVENT CDCl3
NS 16
DS 2
SWH 8223.685 Hz
FIDRES 0.125483 Hz
AQ 3.9846387 sec
RG 202
DM 60.000 usec
DE 6.50 usec
TE 297.3 K
D1 1.00000000 sec
TDO 1

```

```

----- CHANNEL f1 -----
NUC1 13
P1 13.00 usec
PL1 -1.00 dB
PULP1 13.18669796 W
SFO1 400.1724112 MHz
SI 32768
SF 400.1700047 MHz
WDW EM
SSB 0
LB 0.30 Hz
GB 0
PC 1.00

```

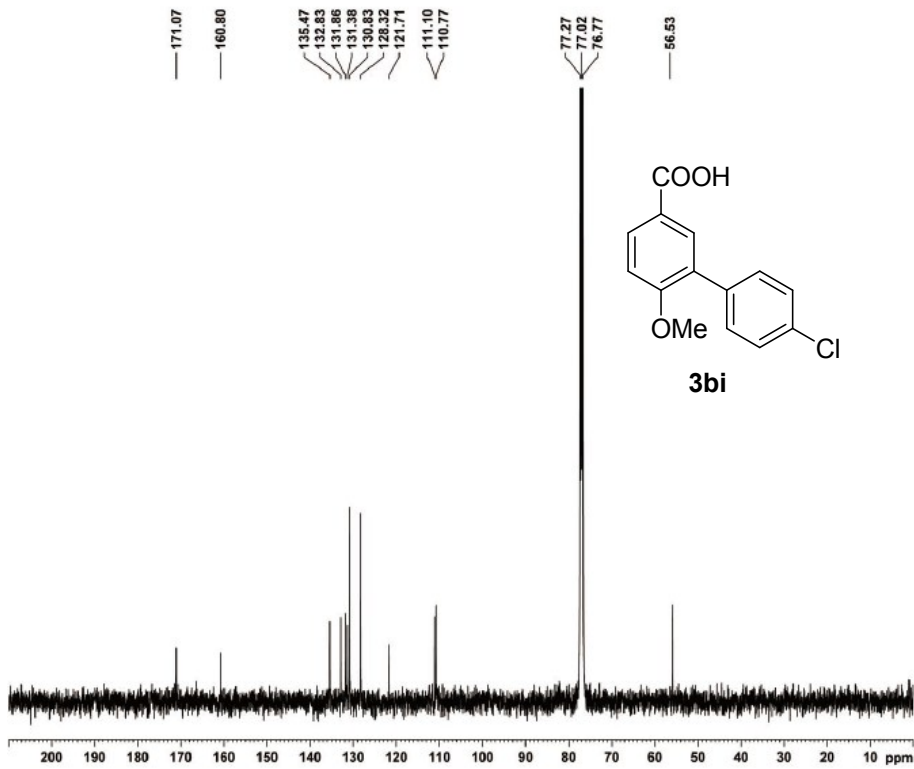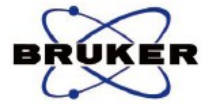

```

NAME LRM2014-9-1-8-C13
EXPNO 1
PROCNO 1
Date_ 20140903
Time 15.33
INSTRUM spect
PROBHD 5 mm PABBO BB-
PULPROG zgpg30
TD 6536
SOLVENT CDCl3
NS 1024
DS 4
SWH 29761.904 Hz
FIDRES 0.454131 Hz
AQ 1.1010548 sec
RG 2050
DM 16.800 usec
DE 6.50 usec
TE 297.3 K
D1 2.00000000 sec
D11 0.03000000 sec
TDO 1

```

```

----- CHANNEL f1 -----
SFO1 125.7703637 MHz
NUC1 13C
P1 9.80 usec
SI 32768
SF 125.7577885 MHz
WDW EM
SSB 0
LB 3.00 Hz
GB 0
PC 1.40

```

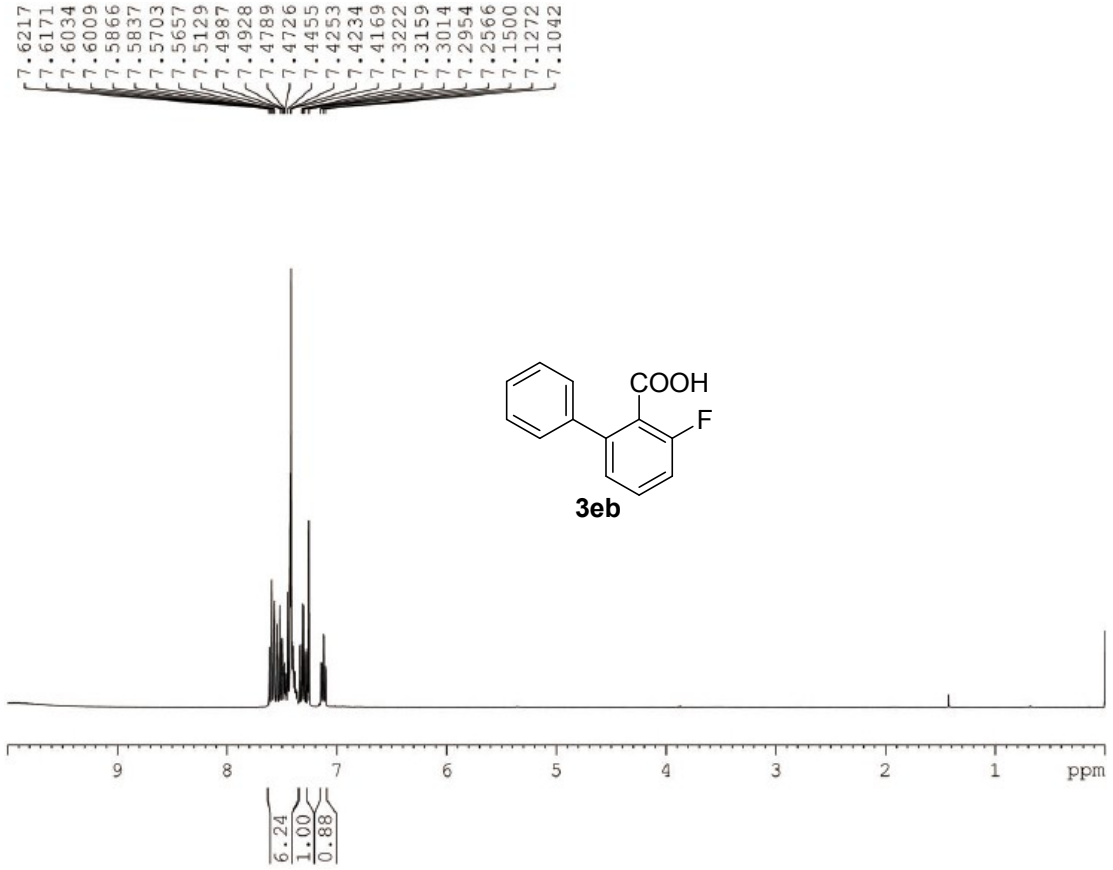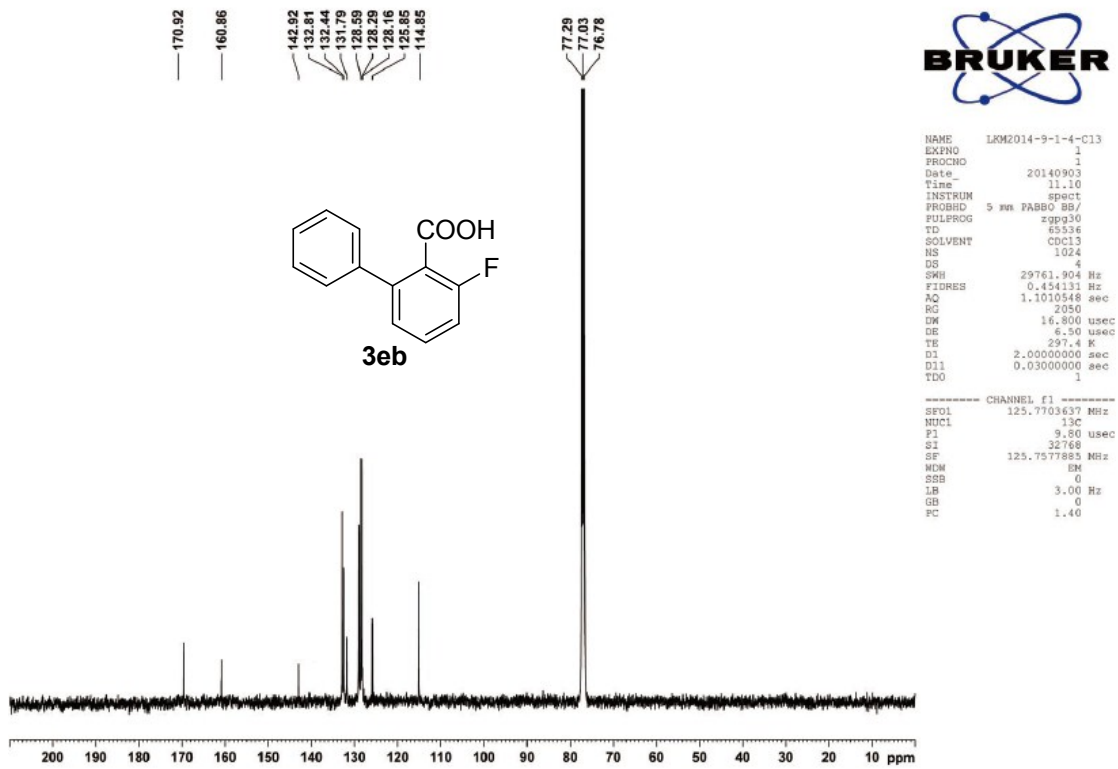



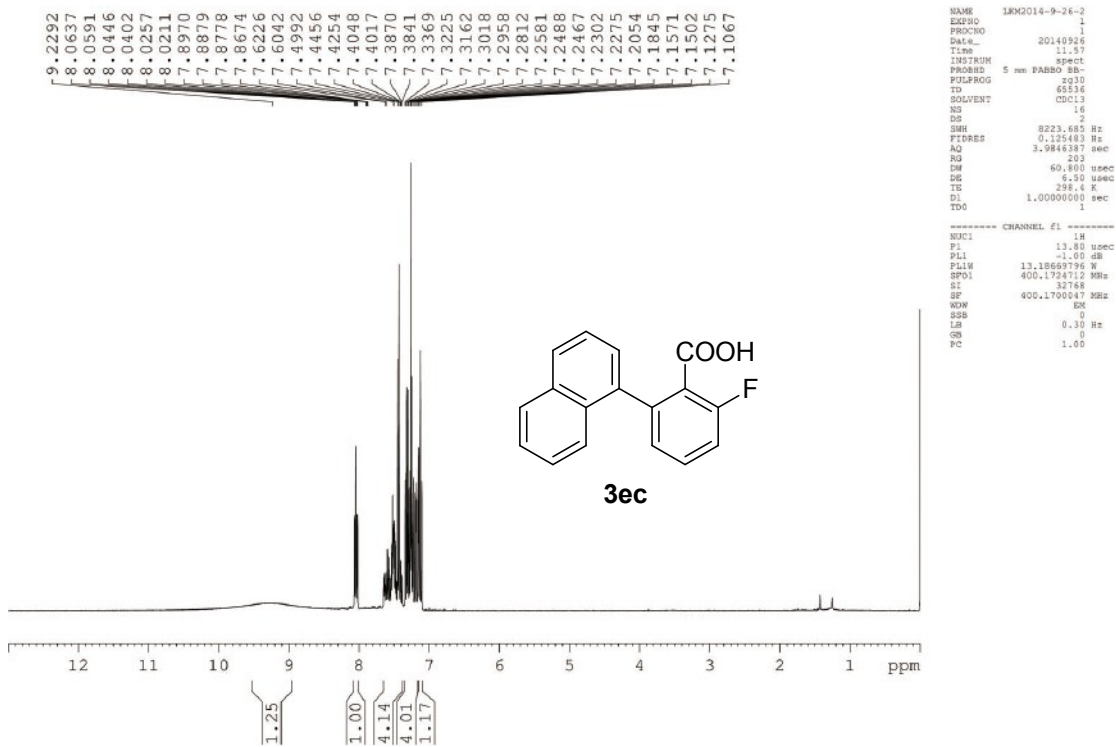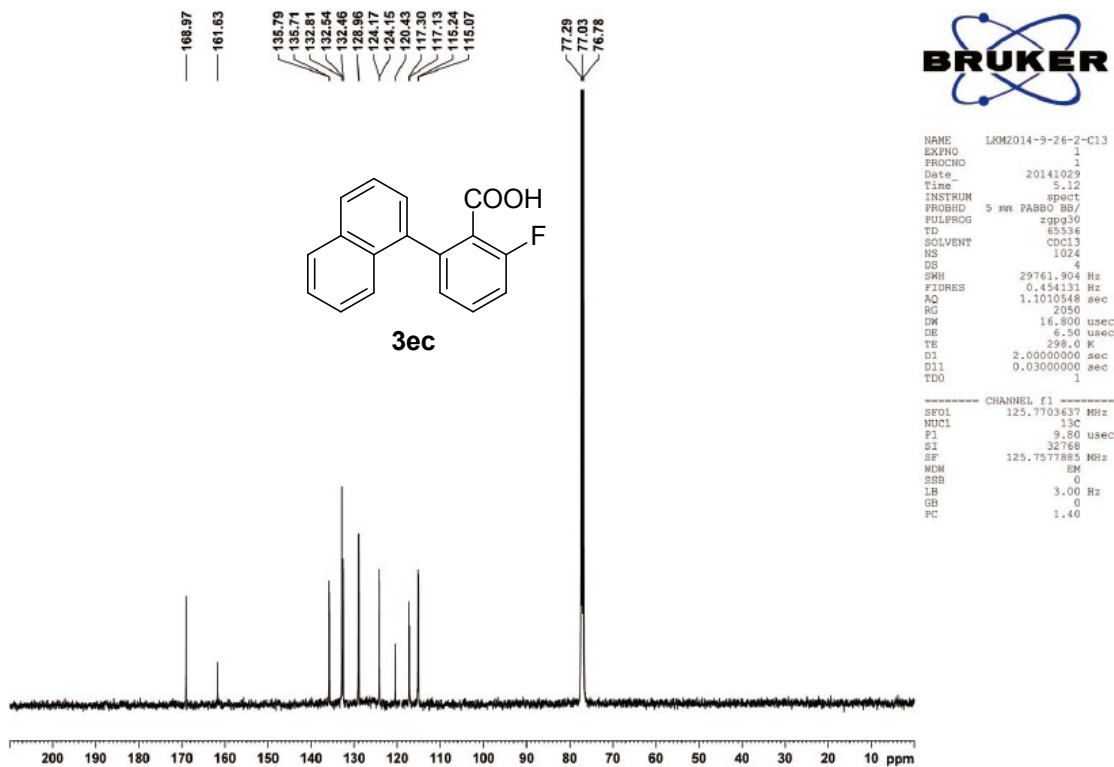



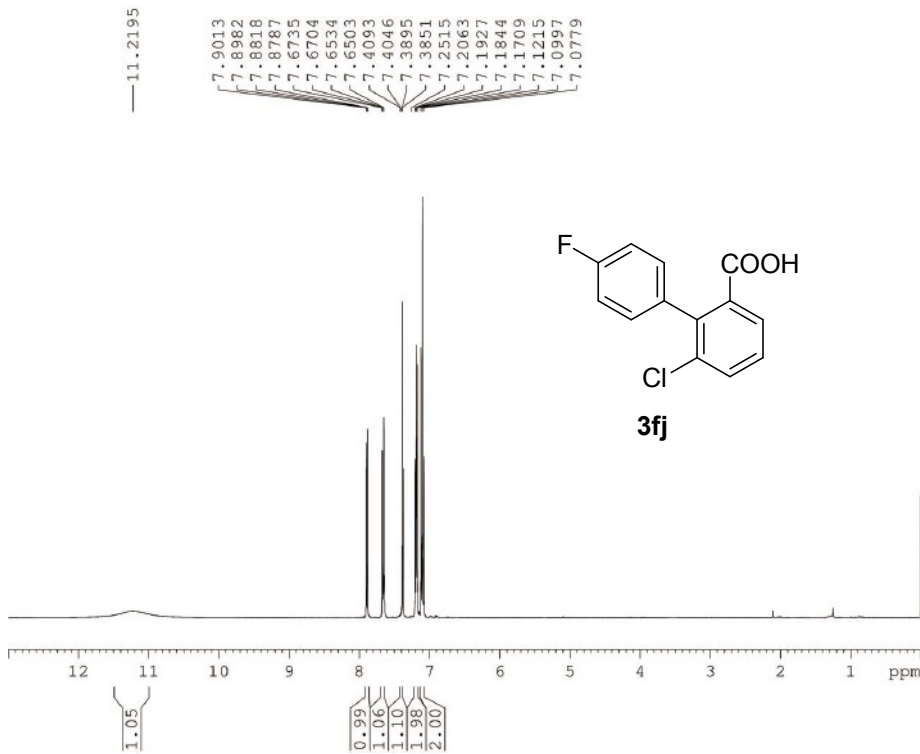

```

NAME LKM2014-9-17-2
EXPNO 1
PROCNO 1
Date_ 20140917
Time 9.46
INSTRUM spect
PROBHD 5 mm PABBO BB-
PULPROG zgpg30
TD 65536
SOLVENT CDCl3
NS 16
DS 2
SWH 8223.085 Hz
FIDRES 0.125483 Hz
AQ 3.9846387 sec
RG 161
DW 60.800 usec
DE 6.50 usec
TE 298.5 K
D1 1.0000000 sec
TD0 1
----- CHANNEL f1 -----
NUC1 13C
P1 13.00 usec
PL1 0.00 dB
PLW 13.18662796 W
SFO1 400.1724712 MHz
SI 32768
SF 400.1700072 MHz
WDW EM
SSB 0
LB 0.30 Hz
GB 0
PC 1.00

```

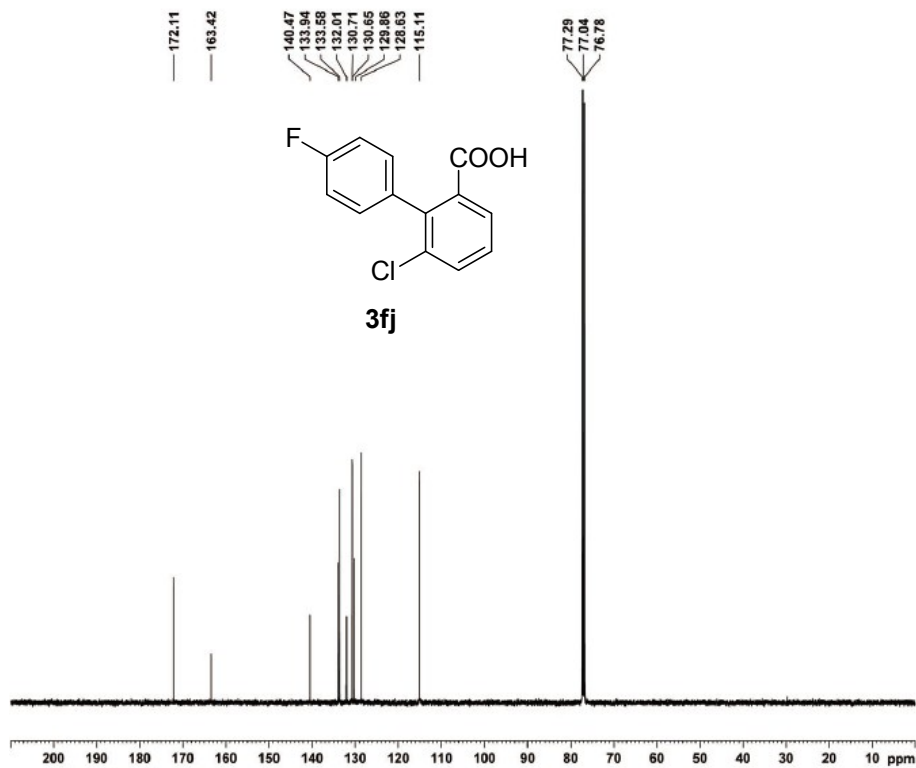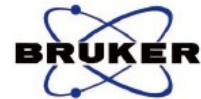

```

NAME LKM2014-9-17-2-C13
EXPNO 1
PROCNO 1
Date_ 20140924
Time 22.46
INSTRUM spect
PROBHD 5 mm PABBO BB/
PULPROG zgpg30
TD 65536
SOLVENT CDCl3
NS 500
DS 4
SWH 29761.904 Hz
FIDRES 0.454131 Hz
AQ 1.1010548 sec
RG 2050
DW 16.800 usec
DE 6.50 usec
TE 298.0 K
D1 2.0000000 sec
D11 0.0300000 sec
TD0 1
----- CHANNEL f1 -----
SFO1 125.7703637 MHz
NUC1 13C
P1 9.80 usec
PL1 0.00 dB
PLW 125.7577883 MHz
SI 32768
SF 125.7577883 MHz
WDW EM
SSB 0
LB 1.00 Hz
GB 0
PC 1.40

```

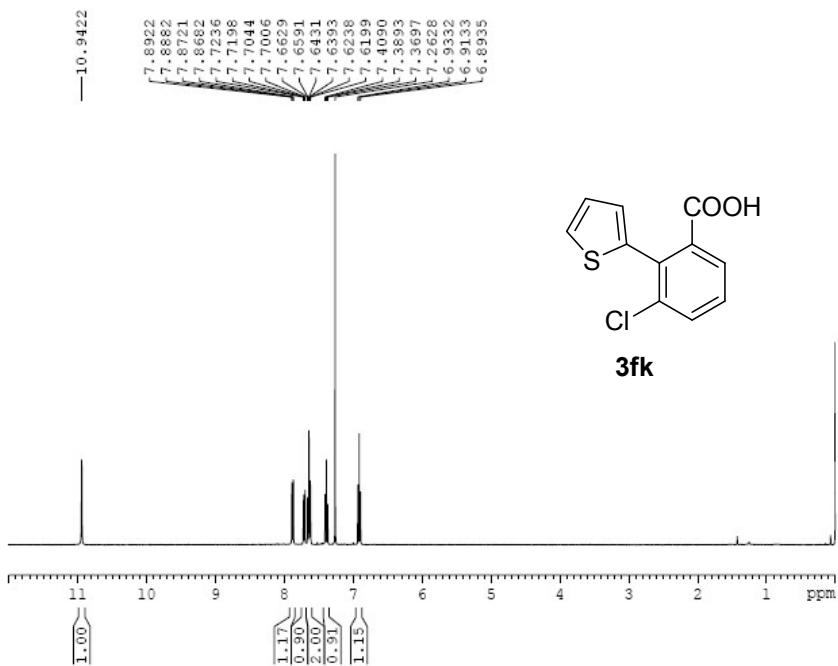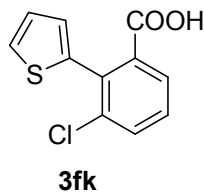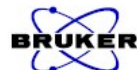

```

NAME LRM2014-10-12-1
EXPNO 1
PROCNO 1
Date_ 20141115
Time 10.55
INSTRUM spect
PROBHD 5 mm PABBO BB-
PULPROG zgpg30
TD 65536
SOLVENT CDCl3
NS 10
DS 4
SWH 8223.695 Hz
FIDRES 0.125483 Hz
AQ 1.984337 sec
RG 2050
DE 6.50 usec
TE 298.0 K
D1 2.0000000 sec
D11 1.0000000 sec
TDQ 1

```

```

----- CHANNEL f1 -----
NUC1 13C
P1 13.00 usec
PL1 -1.50 dB
SFO1 101.626125 MHz
SF 400.1724112 MHz
SI 32768
SP 400.1700028 MHz
SFO2 0
SFB 0
SB 0.10 Hz
GB 0
PC 1.00

```

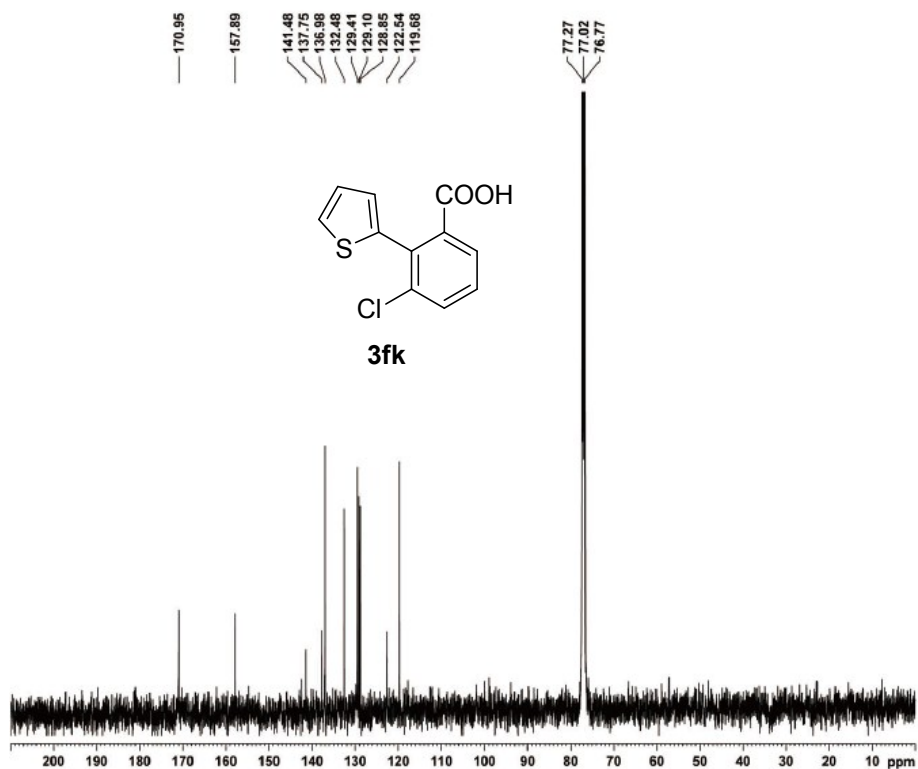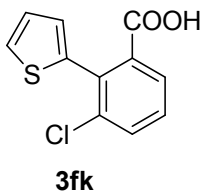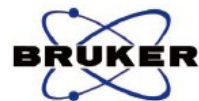

```

NAME LRM2014-10-12-1-C13
EXPNO 1
PROCNO 1
Date_ 20141115
Time 10.08
INSTRUM spect
PROBHD 5 mm PABBO BB/
PULPROG zgpg30
TD 65536
SOLVENT CDCl3
NS 1024
DS 4
SWH 29761.904 Hz
FIDRES 0.454131 Hz
AQ 1.1010548 sec
RG 2050
DE 6.50 usec
TE 298.0 K
D1 2.0000000 sec
D11 0.0300000 sec
TDQ 1

```

```

----- CHANNEL f1 -----
SFO1 125.7703637 MHz
NUC1 13C
P1 9.80 usec
SI 32768
SF 125.7577895 MHz
SFO2 0
SFB 0
SB 3.00 Hz
GB 0
PC 1.40

```

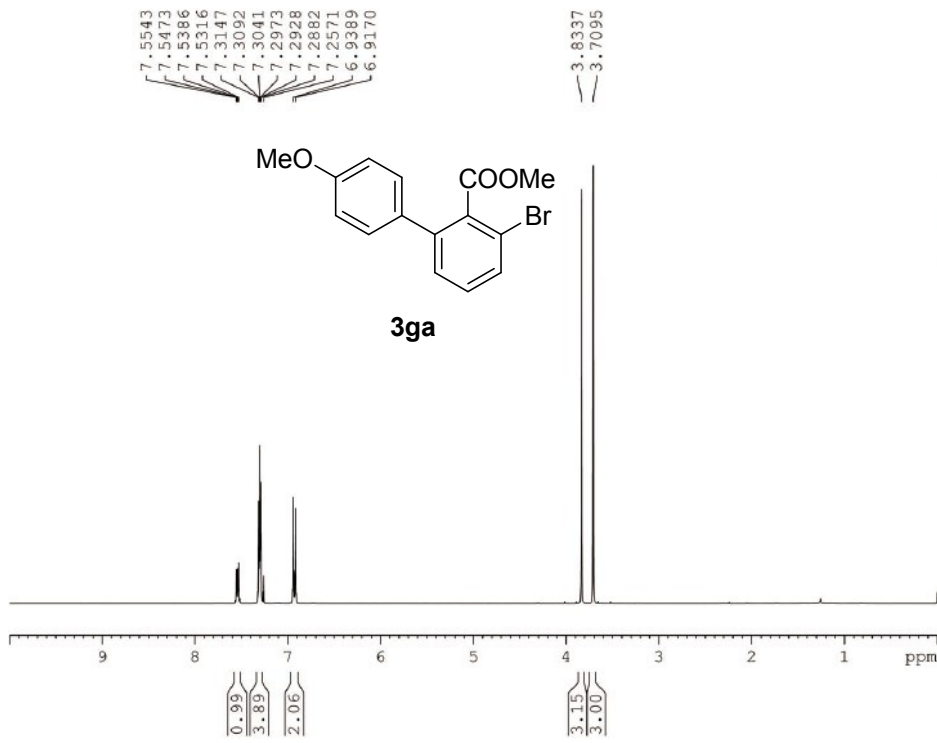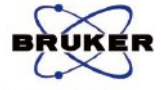

```

NAME LRM2014-12-2-1
EXPNO 1
PROCNO 1
Date_ 20141202
Time 10.18
INSTRUM spect
PROBHD 5 mm PABBO BB-
PULPROG zgpg30
TD 65536
SOLVENT CDCl3
NS 16
DS 2
SWH 8223.685 Hz
FIDRES 0.125483 Hz
AQ 3.9844387 sec
RG 128
DM 60.800 usec
DE 4.50 usec
TE 291.2 K
D1 1.00000000 sec
TDO 1
----- CHANNEL f1 -----
NUC1 1H
P1 13.80 usec
PL1 -1.00 dB
RGW 13.14669794 K
SFO1 400.172112 MHz
SI 32768
SF 400.1700000 MHz
WDW EM
SSB 0
LB 0.30 Hz
GB 0
PC 1.00

```

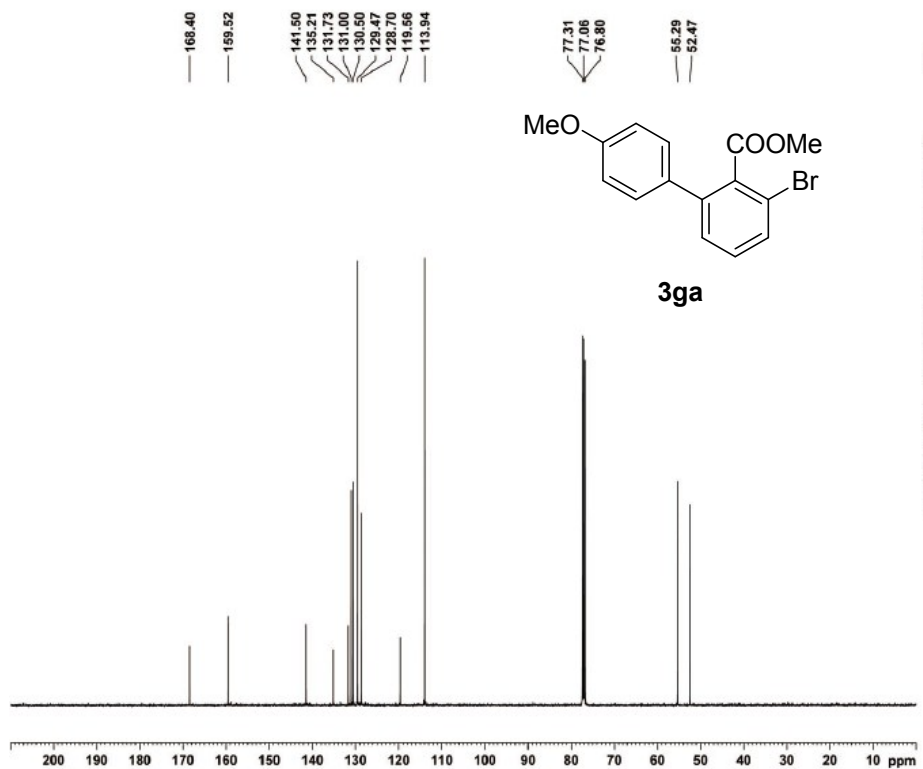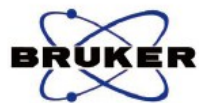

```

NAME LRM2014-12-2-1-C13
EXPNO 1
PROCNO 1
Date_ 20141210
Time 8.59
INSTRUM spect
PROBHD 5 mm PABBO BB-
PULPROG zgpg30
TD 65536
SOLVENT CDCl3
NS 1024
DS 4
SWH 29761.904 Hz
FIDRES 0.454131 Hz
AQ 1.1010548 sec
RG 2050
DM 16.800 usec
DE 6.50 usec
TE 298.0 K
D1 2.00000000 sec
D11 0.03000000 sec
TDO 1
----- CHANNEL f1 -----
SFO1 125.7703637 MHz
NUC1 13C
P1 9.50 usec
SI 32768
SF 125.7577885 MHz
WDW EM
SSB 0
LB 1.00 Hz
GB 0
PC 1.40

```

8.2276  
8.2083  
7.9392  
7.9211  
7.3109  
7.3036  
7.2847  
7.2482  
7.2302  
7.1969  
7.1790  
7.1482  
7.1297

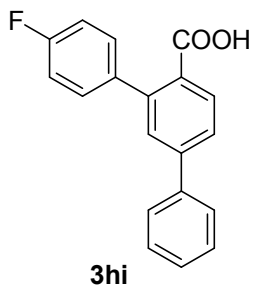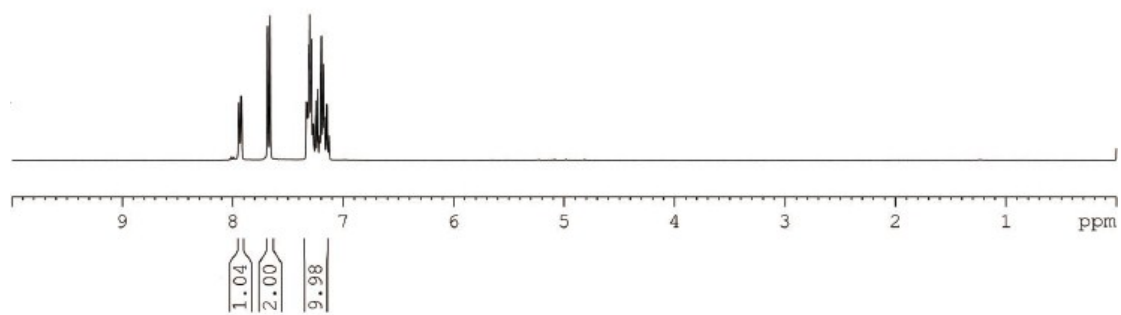

168.08  
161.47  
141.88  
140.36  
135.35  
135.25  
131.59  
131.44  
129.00  
128.32  
128.27  
128.06  
127.63  
127.56  
115.56  
77.31  
77.05  
76.80

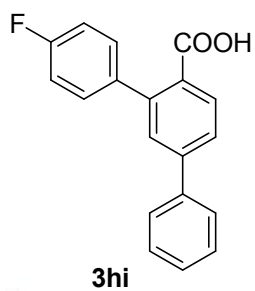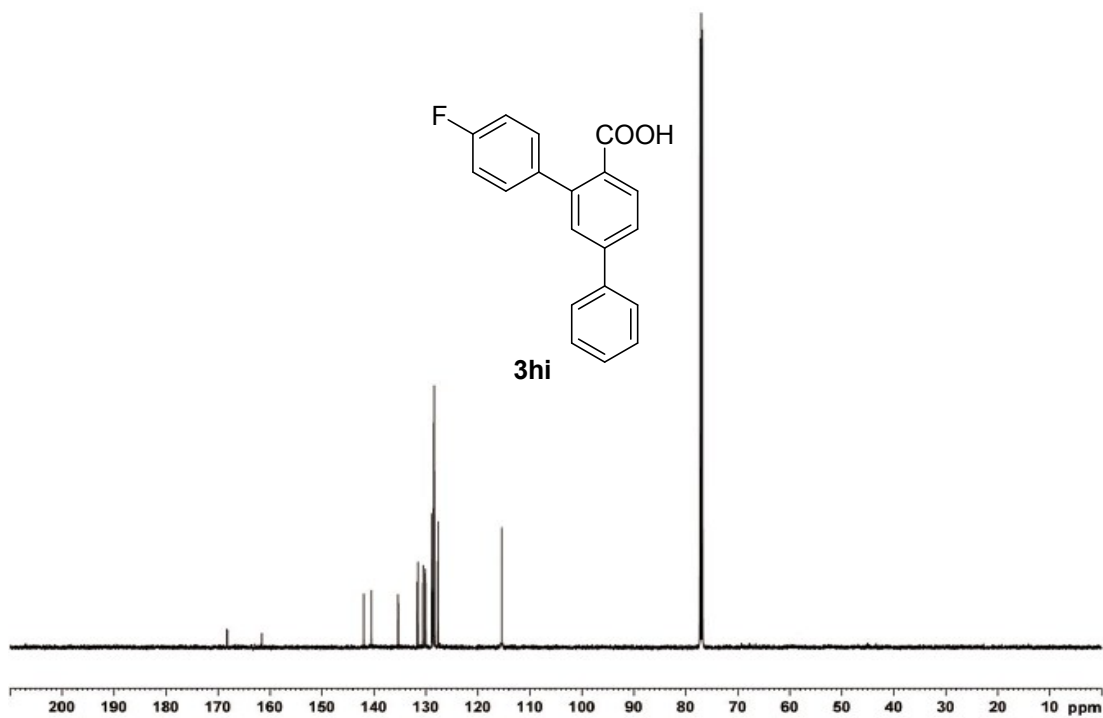

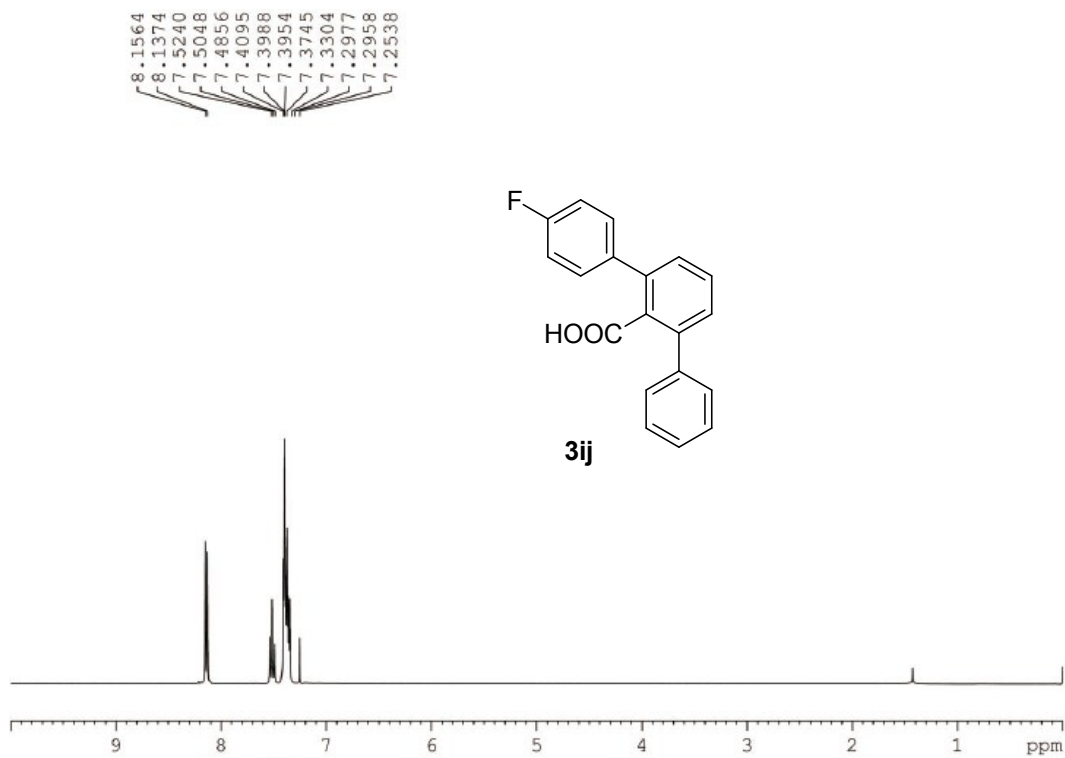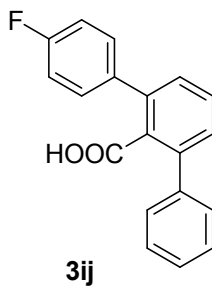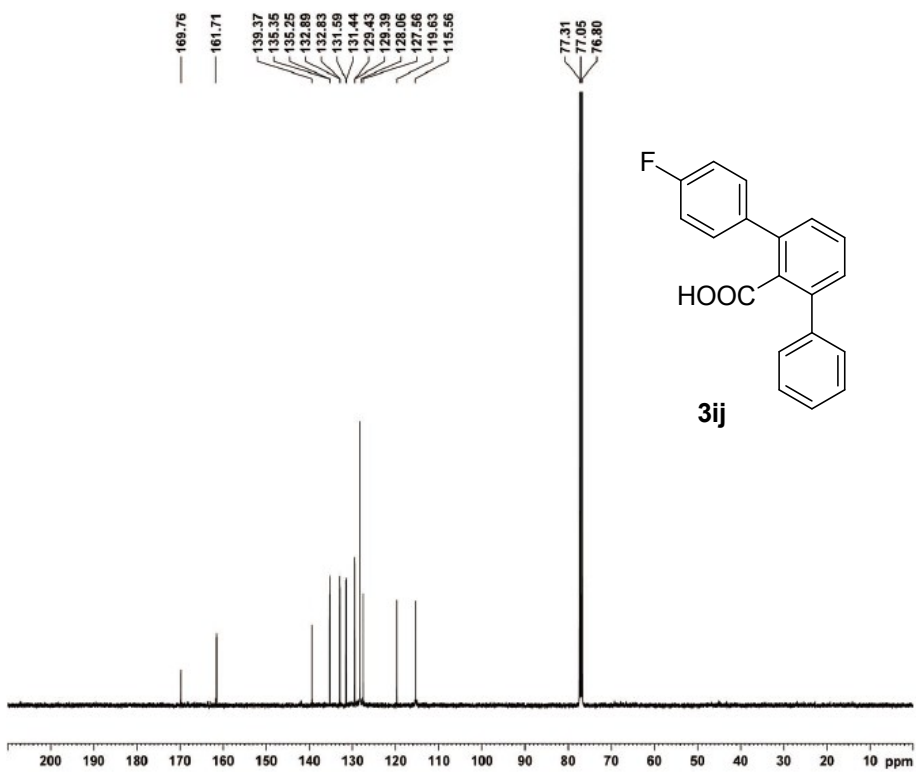

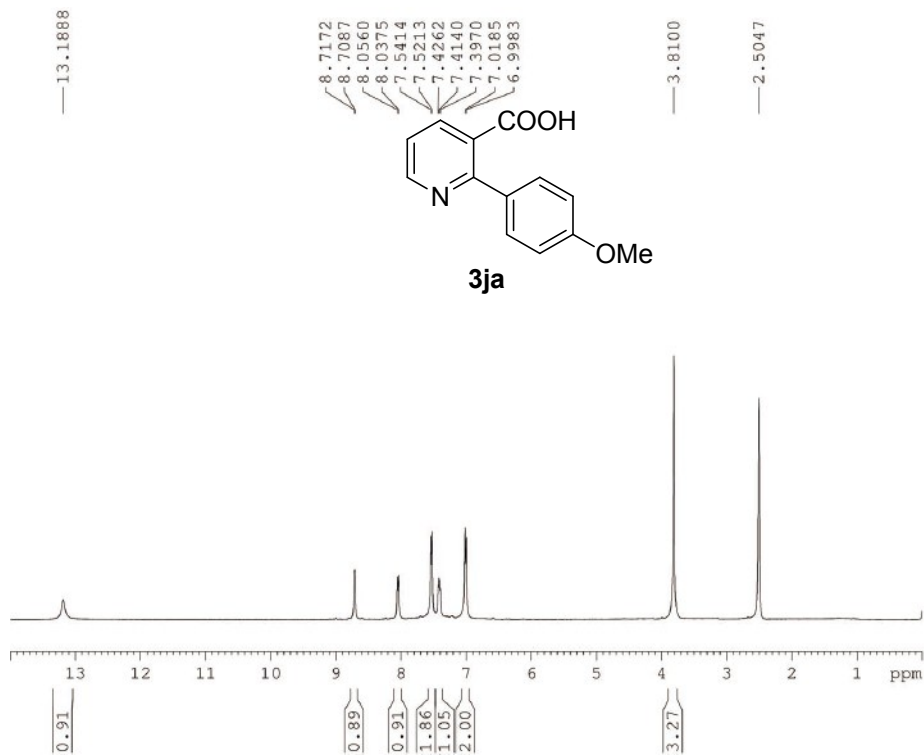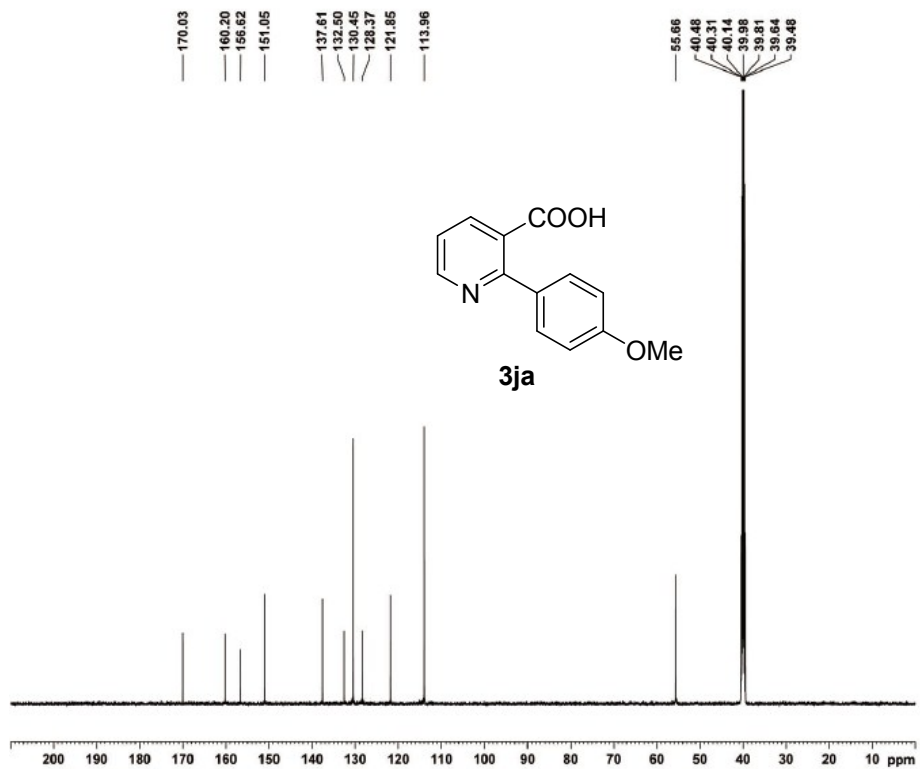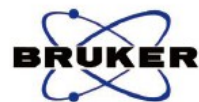

```

NAME LRM2014-5-5-2-C13
EXPNO 2
PROCNO 1
Date_ 20140525
Time 17.48
INSTRUM spect
PROBHD 5 mm PABBO BB-
PULPROG zpg30
TD 65536
SOLVENT DMSO
NS 1024
DS 4
SWH 29761.904 Hz
FIDRES 0.454131 Hz
AQ 1.1010548 sec
RG 2050
DW 16.800 usec
DE 6.50 usec
TE 298.0 K
D1 2.00000000 sec
D11 0.03000000 sec
TDO 1
----- CHANNEL f1 -----
SFO1 125.7703637 MHz
NUC1 13C
P1 9.80 usec
SI 32768
SF 125.7577885 MHz
WDW EM
SSB 0
LB 1.00 Hz
GB 0
PC 1.40
  
```

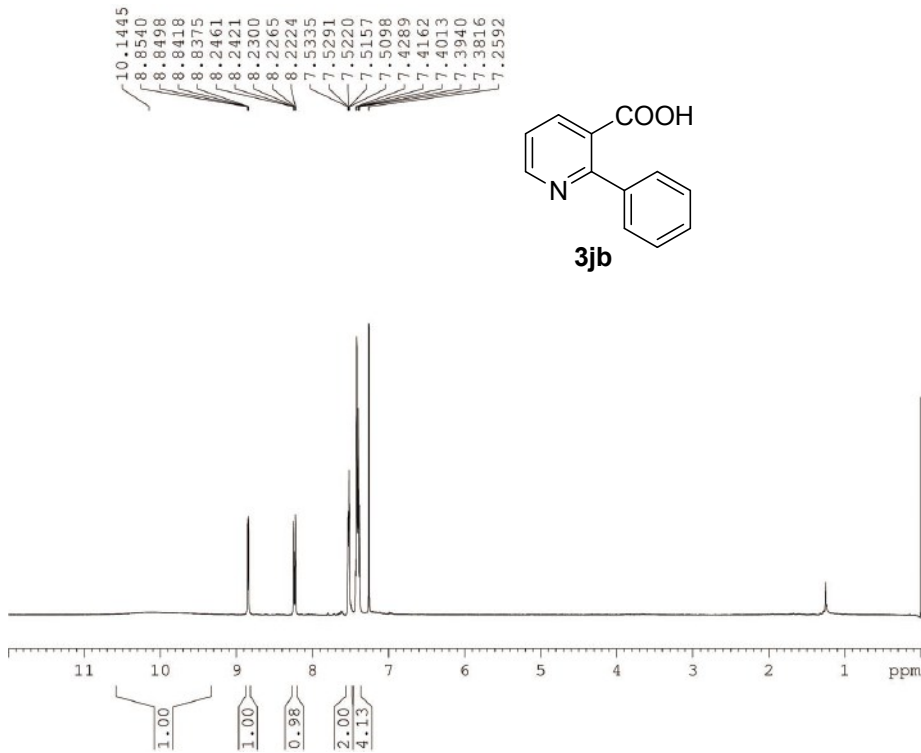

```

NAME Lkm2014-4-16-4
EXPNO 1
PROCNO 1
Date_ 20140416
Time 11.23
INSTRUM spect
PROBHD 5 mm PABBO BB-
PULPROG zgpg30
TD 65536
SOLVENT CDCl3
NS 16
DS 4
SWH 8223.685 Hz
FIDRES 0.125483 Hz
AQ 3.9846387 sec
RG 203
DM 60.800 usec
DE 6.50 usec
TE 297.4 K
D1 1.00000000 sec
TDO 1
----- CHANNEL f1 -----
NUC1 1H
P1 13.80 usec
PL1 -1.00 dB
PL1w 15.18669796 W
SFO1 400.1724113 MHz
SI 32768
SF 400.1700332 MHz
WDW EM
SSB 0
LB 0.30 Hz
GB 0
PC 1.00

```

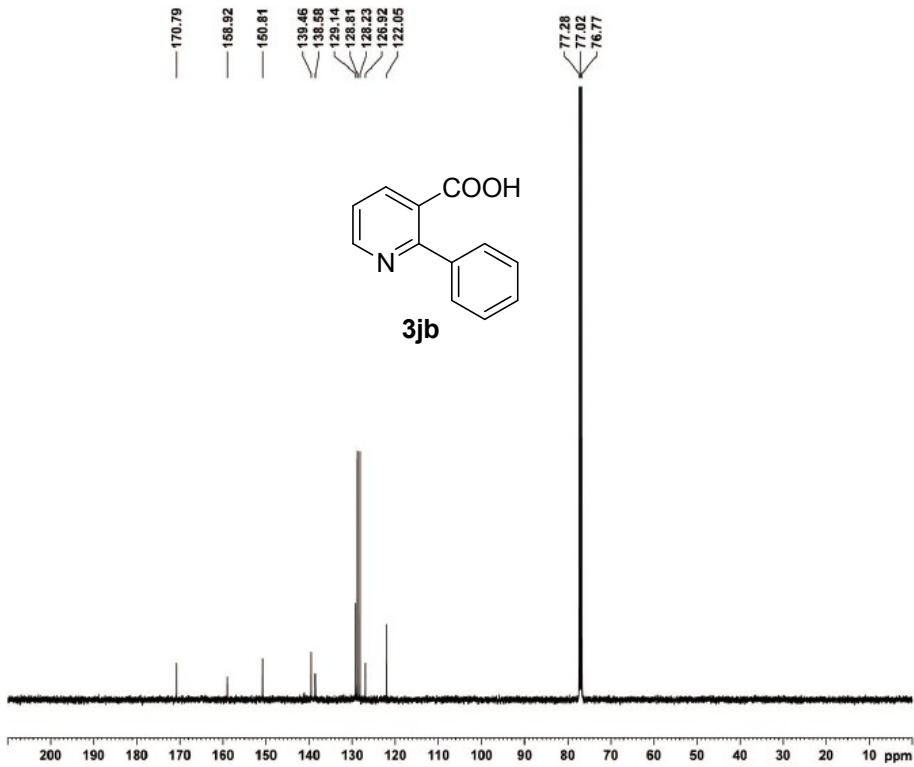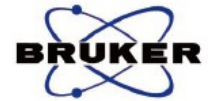

```

NAME Lkm2014-4-16-4-C13
EXPNO 3
PROCNO 1
Date_ 20140528
Time 7.13
INSTRUM spect
PROBHD 5 mm PABBO BB/
PULPROG zgpg30
TD 65536
SOLVENT CDCl3
NS 1024
DS 4
SWH 29761.904 Hz
FIDRES 0.454133 Hz
AQ 1.1010348 sec
RG 2050
DM 16.800 usec
DE 6.50 usec
TE 298.0 K
D1 2.00000000 sec
D11 0.03000000 sec
TDO 1
----- CHANNEL f1 -----
SFO1 125.7703637 MHz
NUC1 13C
P1 9.80 usec
PL1 0
SF 125.7577885 MHz
WDW EM
SSB 0
LB 1.00 Hz
GB 0
PC 1.40

```

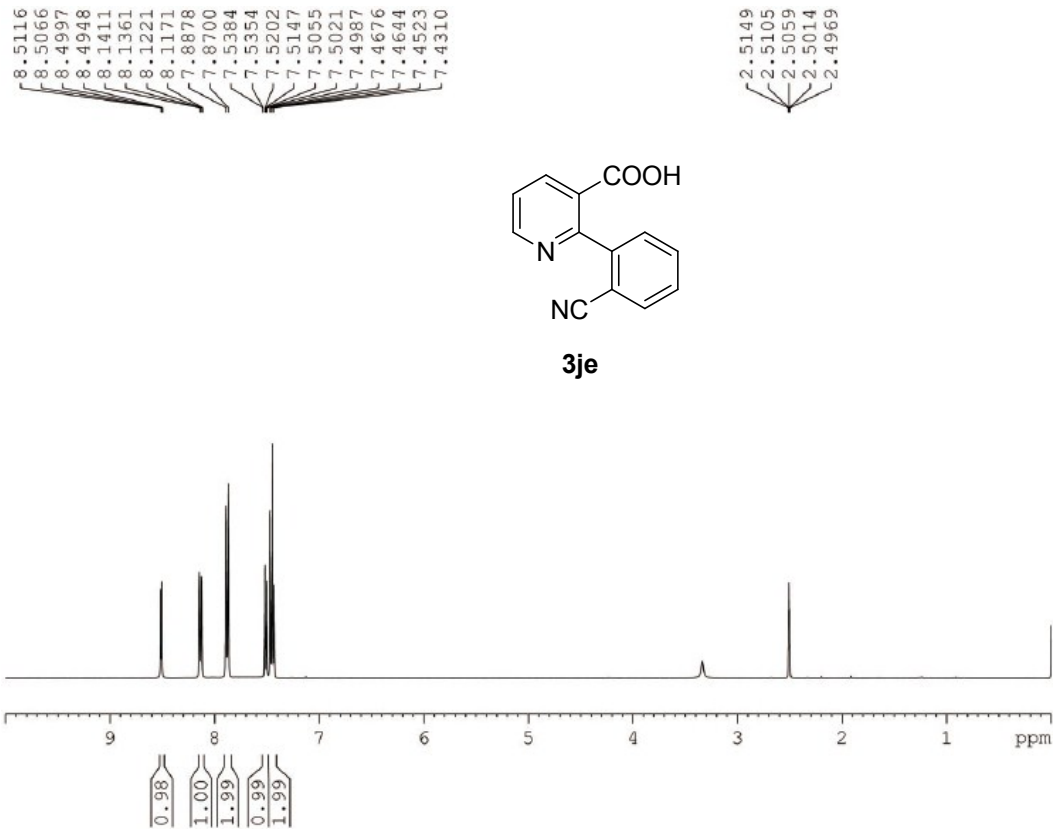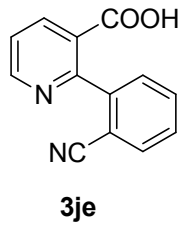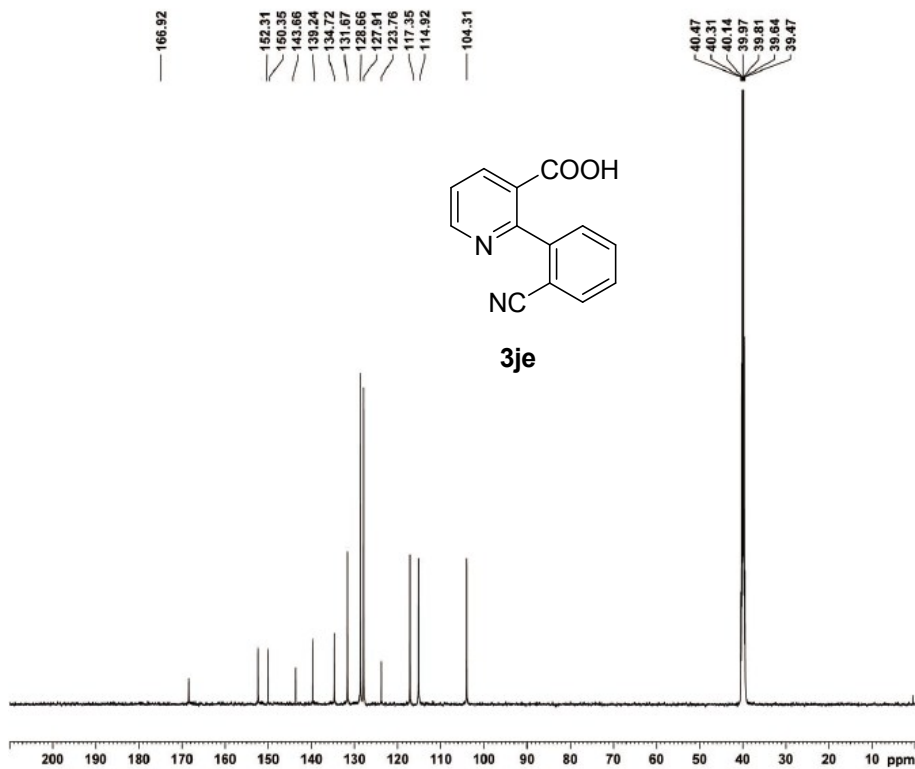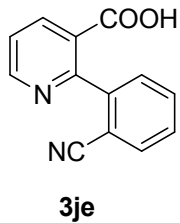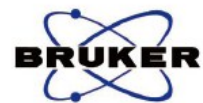

NAME LRM2014-9-1-2-C13  
EXPNO 1  
PROCNO 1  
Date\_ 20140903  
Time 9.54  
INSTRUM spect  
PROBHD 5 mm PABBO BB/  
PULPROG zgpg30  
TD 65336  
SOLVENT DMSO  
NS 787  
DS 4  
SWH 29761.904 Hz  
FIDRES 0.454131 Hz  
AQ 1.1010348 sec  
RG 2050  
DW 16.800 usec  
DE 6.50 usec  
TE 297.0 K  
D1 2.0000000 sec  
D11 0.0300000 sec  
TDO 1

----- CHANNEL f1 -----  
SEOL 125.7703637 MHz  
NUC1 13C  
P1 9.80 usec  
S2 32768  
SE 125.7577883 MHz  
WDM EM  
SSB 0  
LB 3.00 Hz  
GB 0  
PC 1.40



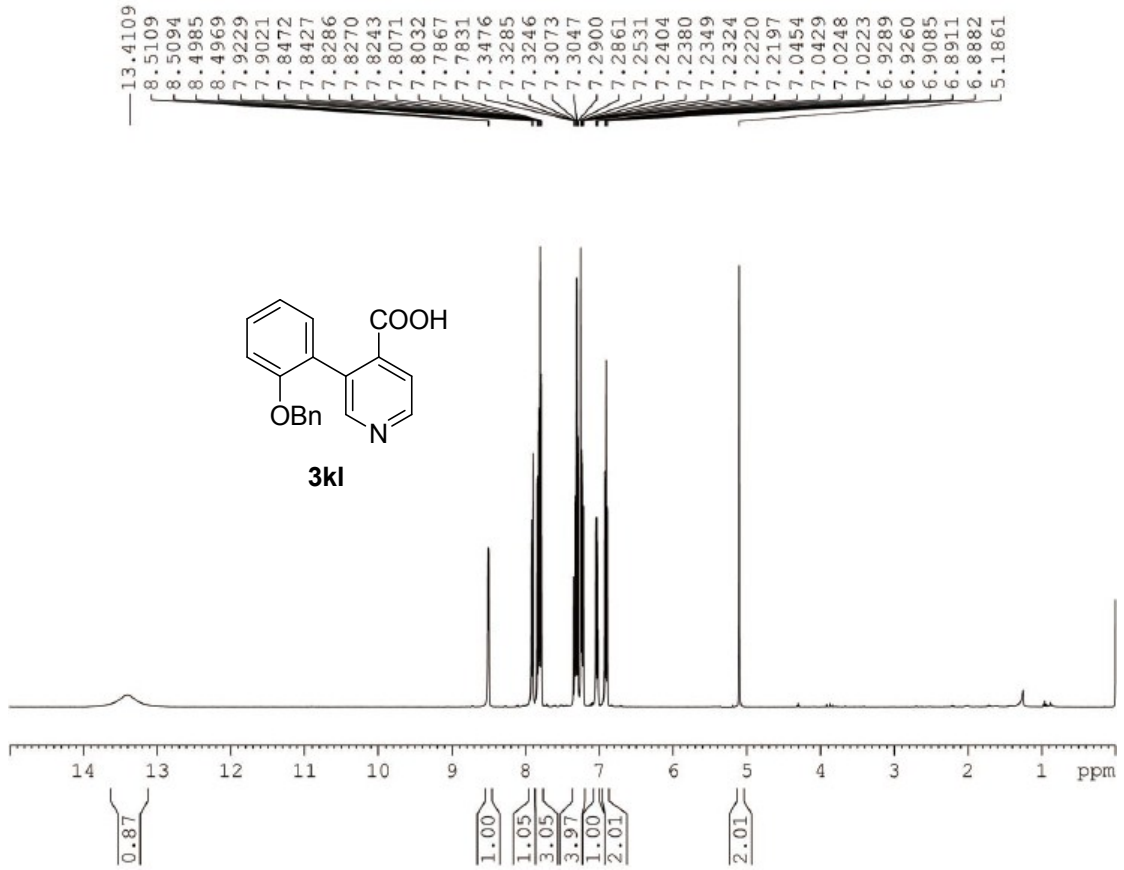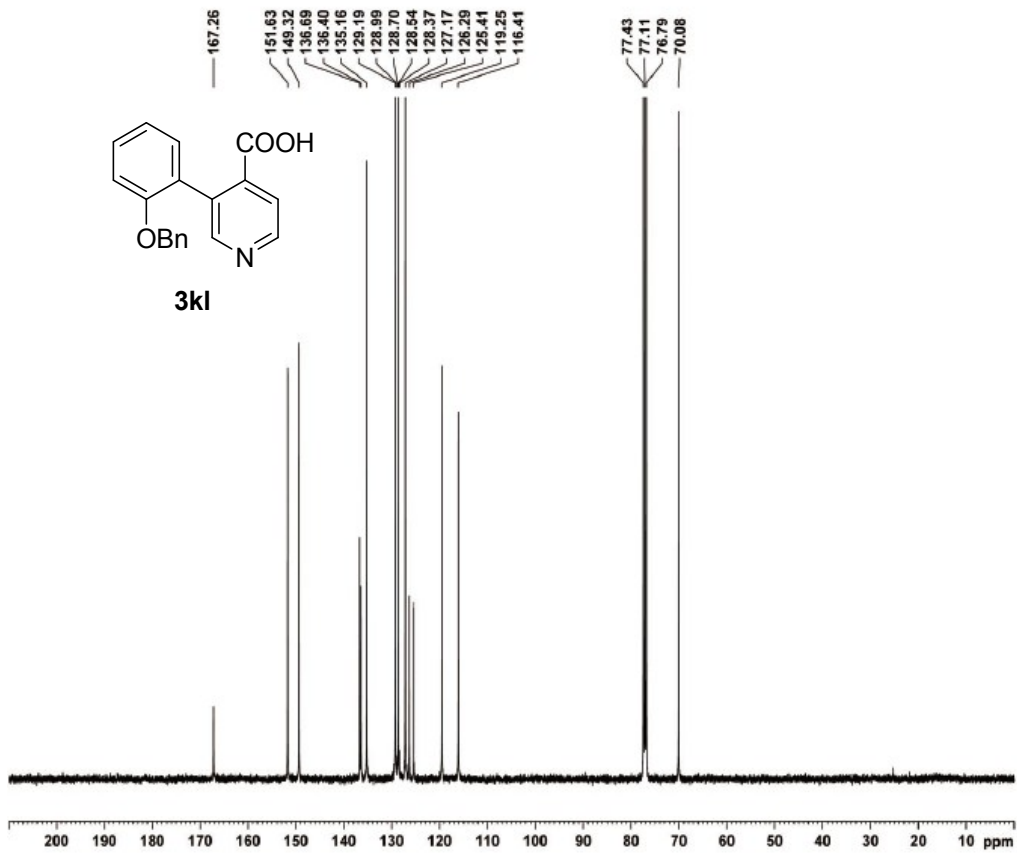

7.8736  
7.8637  
7.6731  
7.6694  
7.6521  
7.6497  
7.6515  
7.4477  
7.4431  
7.4302  
7.4263  
7.4148  
7.4116  
7.3975  
7.3941  
7.3908  
7.3826  
7.3765  
7.3687  
7.3611  
7.3500  
7.3365  
7.3266  
7.2559

```

NAME LHM2014-4-16-5
EXPNO 1
PROCNO 1
Date_ 20140416
Time 11:29
INSTRUM spect
PROBHD 5 mm PABBO BB-
PULPROG zgpg30
TD 65536
SOLVENT CDCl3
NS 16
DS 2
SWH 8223.495 Hz
FIDRES 0.125493 Hz
AQ 3.9946387 sec
RG 203
SM 60.800 usec
DE 6.50 usec
TE 297.4 K
SI 1.00000000 sec
TD0 1

```

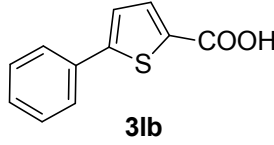

```

----- CHANNEL f1 -----
NUC1 13
P1 13.00 usec
PL1 -1.00 dB
PLW 13.18669796 W
SFO1 400.1724712 MHz
SI 20368
SF 400.1700045 MHz
WDW EM
SSB 0
LB 0.30 Hz
GB 0
PC 1.00

```

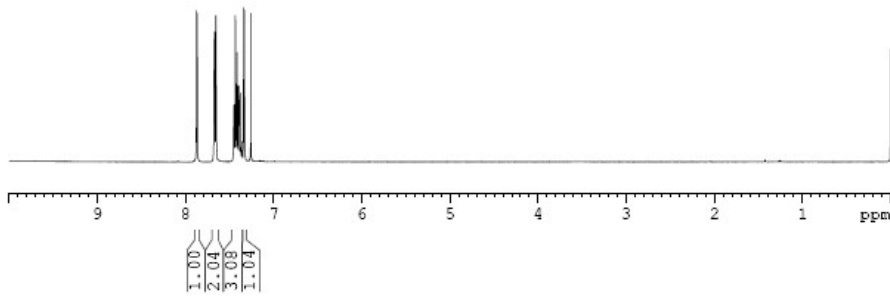

167.41  
153.05  
135.99  
133.27  
131.19  
128.17  
126.36  
123.93  
77.26  
77.03  
76.77

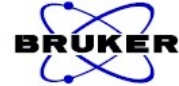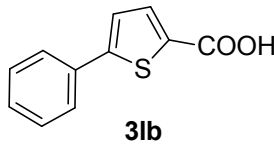

```

NAME LHM2014-4-16-5-C13
EXPNO 5
PROCNO 1
Date_ 20140528
Time 8:15
INSTRUM spect
PROBHD 5 mm PABBO BB-
PULPROG zgpg30
TD 65536
SOLVENT CDCl3
NS 1024
DS 4
SWH 29761.904 Hz
FIDRES 0.454131 Hz
AQ 1.1010548 sec
RG 2050
SM 16.800 usec
DE 6.50 usec
TE 298.0 K
SI 2.00000000 sec
D11 0.03000000 sec
TD0 1

```

```

----- CHANNEL f1 -----
SFO1 125.7703677 MHz
NUC1 13C
P1 9.80 usec
SI 32768
SF 125.7577885 MHz
WDW EM
SSB 0
LB 1.00 Hz
GB 0
PC 1.40

```

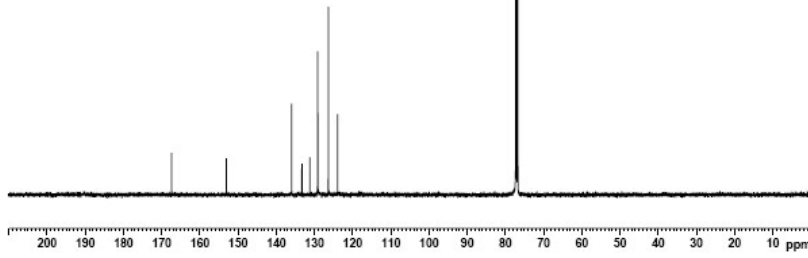

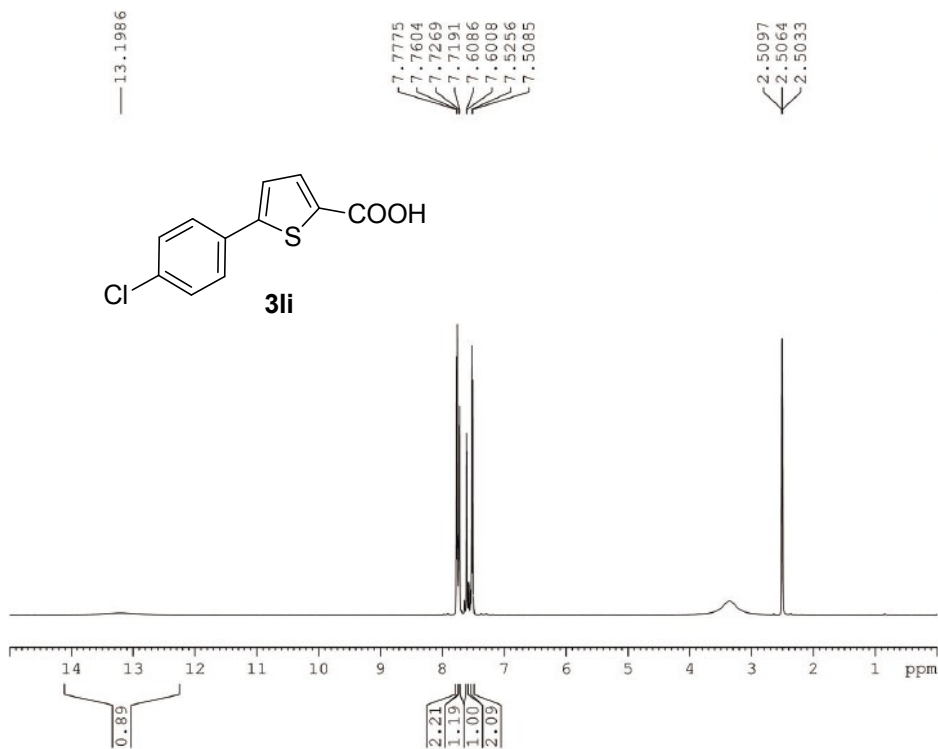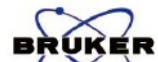

```

NAME LRM2014-6-27-4
EXPERO 5
PROCNO 1
Date_ 20140707
Time 19.48
INSTRUM spect
PROBHD 5 mm PABBO BB/
PULPROG zgpg30
TD 65536
SOLVENT DMSO
NS 16
DS 4
SWH 10000.000 Hz
FIDRES 0.132088 Hz
AQ 3.2768560 sec
RG 129.43
DM 50.060 usec
DE 4.50 usec
TE 298.0 K
D1 1.60000000 sec
TD0 1

```

```

----- CHANNEL f1 -----
SF01 500.130985 MHz
NUC1 13C
P1 9.80 usec
SI 60326
SF 500.130985 MHz
WDW EM
SSB 0
LB 0.30 Hz
GB 0
PC 1.00

```

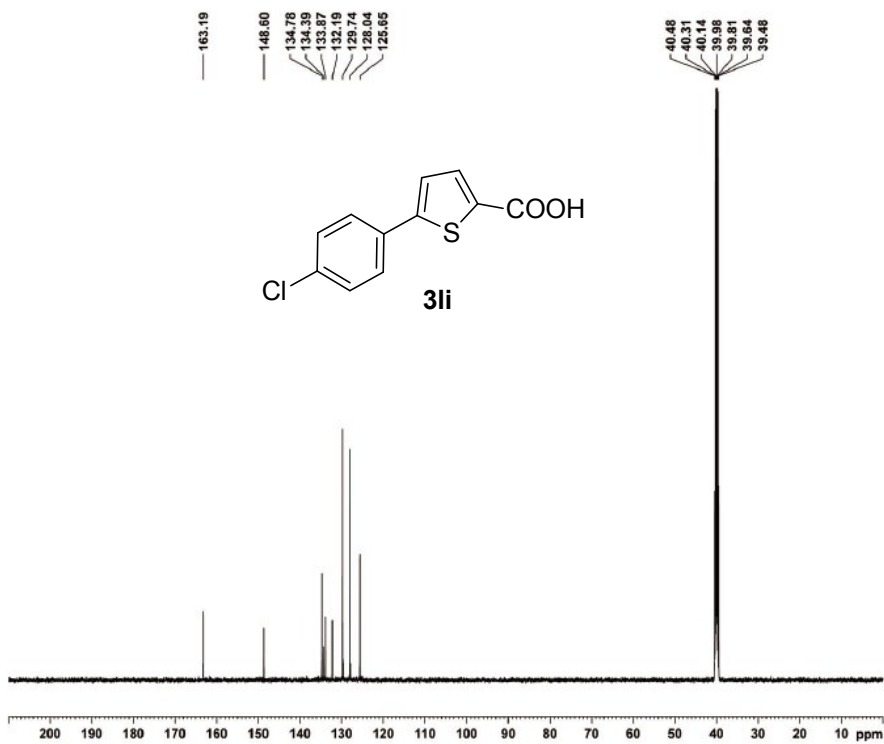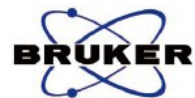

```

NAME LRM2014-6-27-4-C13
EXPERO 13
PROCNO 1
Date_ 20140707
Time 1.09
INSTRUM spect
PROBHD 5 mm PABBO BB/
PULPROG zgpg30
TD 65536
SOLVENT DMSO
NS 1024
DS 4
SWH 29761.904 Hz
FIDRES 0.454131 Hz
AQ 1.1010548 sec
RG 2050
DM 16.800 usec
DE 6.50 usec
TE 298.0 K
D1 2.00000000 sec
D11 0.03000000 sec
TD0 1

```

```

----- CHANNEL f1 -----
SF01 125.7703637 MHz
NUC1 13C
P1 9.80 usec
SI 32768
SF 125.7577883 MHz
WDW EM
SSB 0
LB 1.00 Hz
GB 0
PC 1.40

```

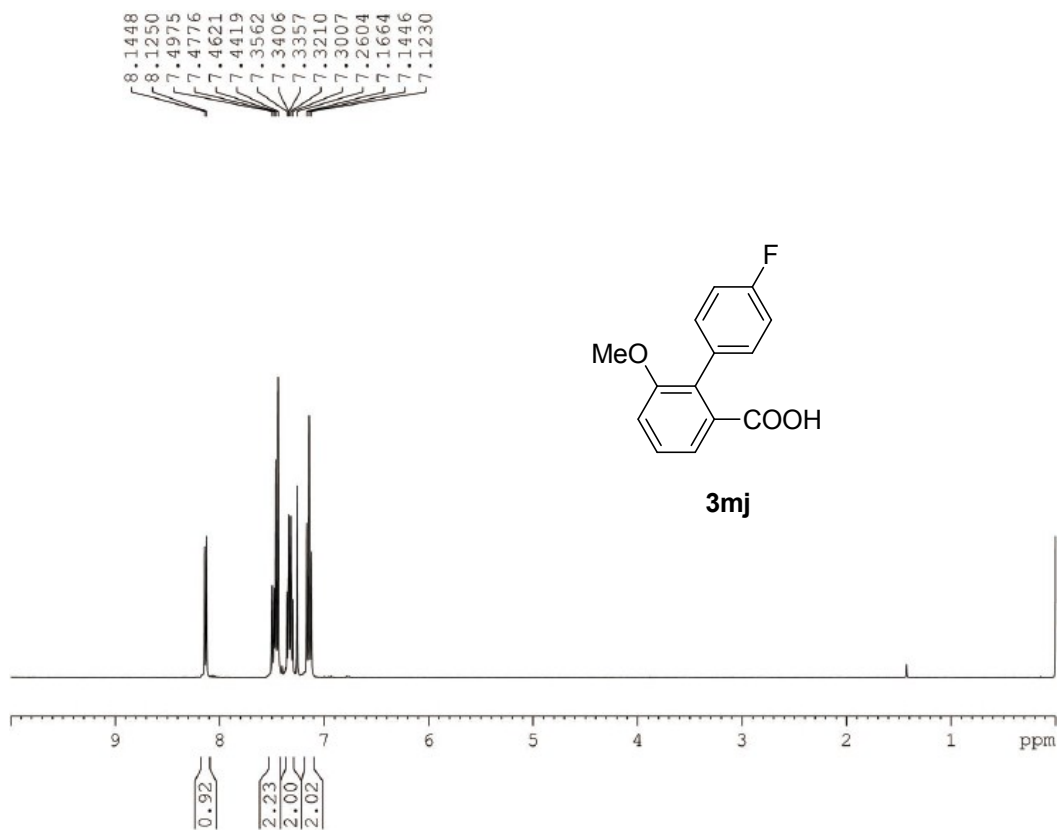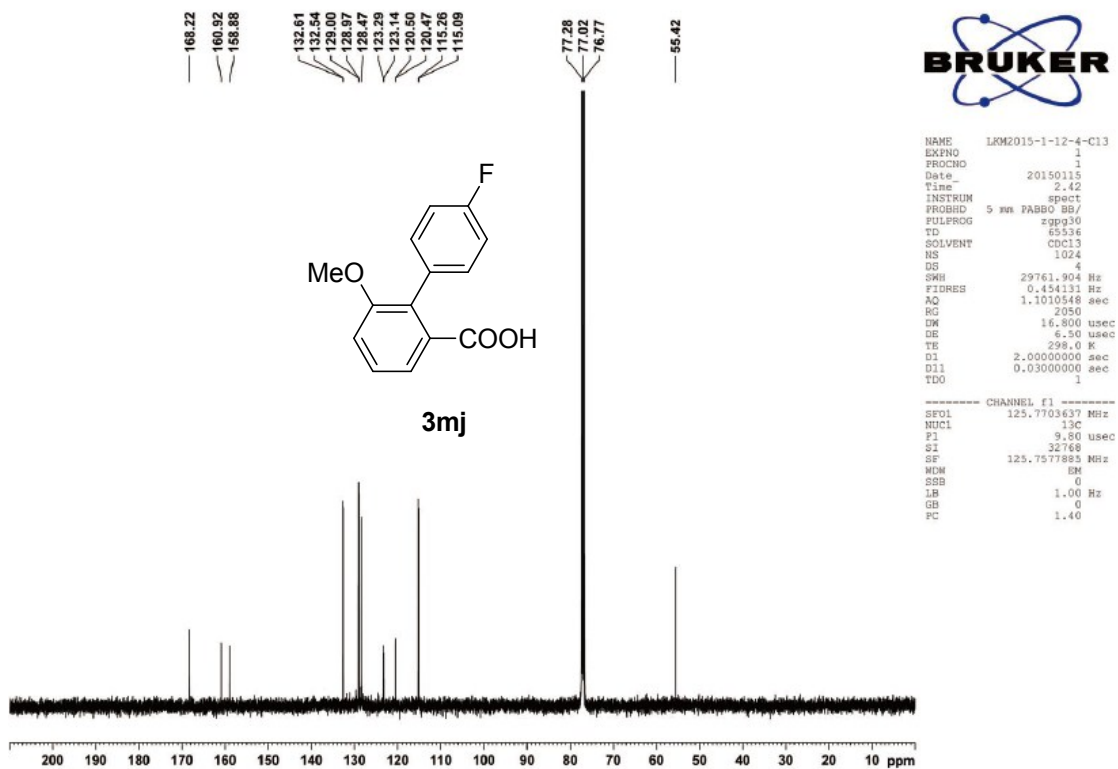

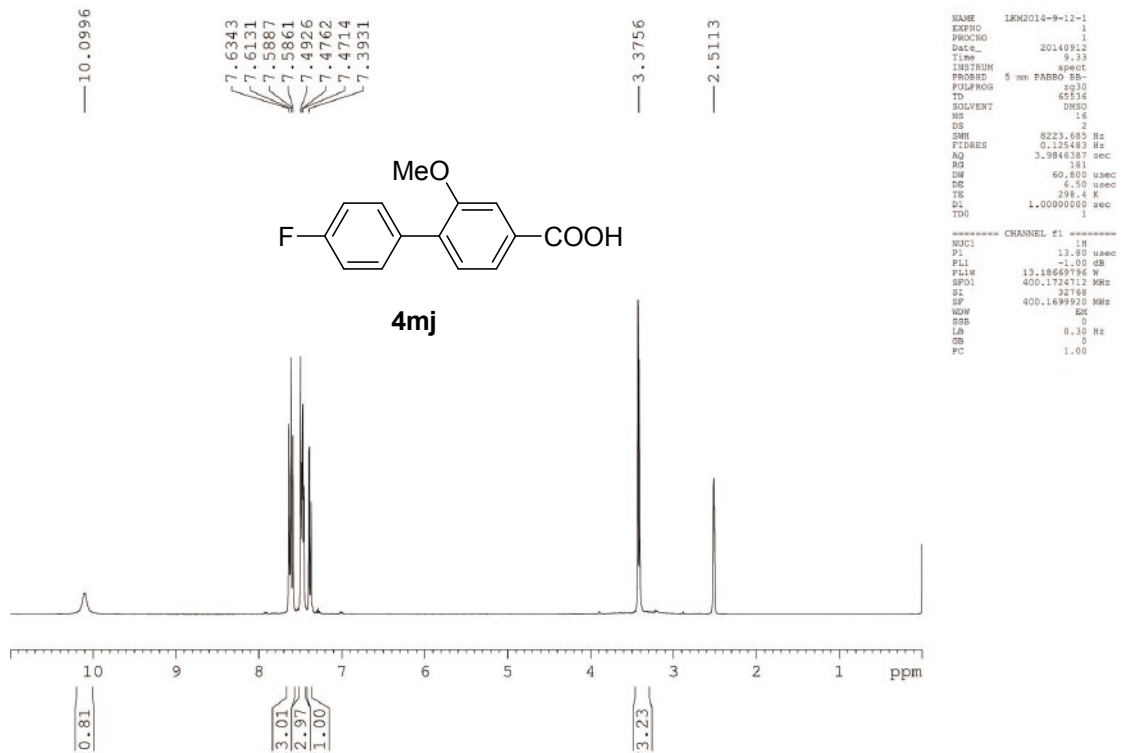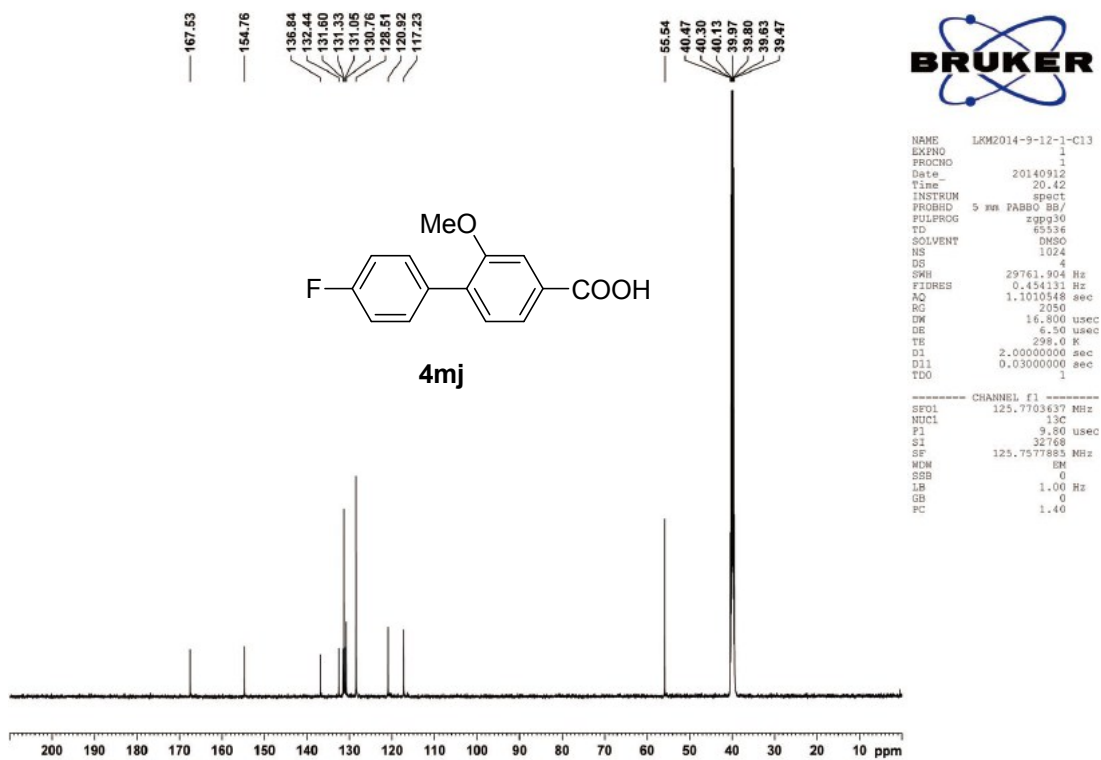

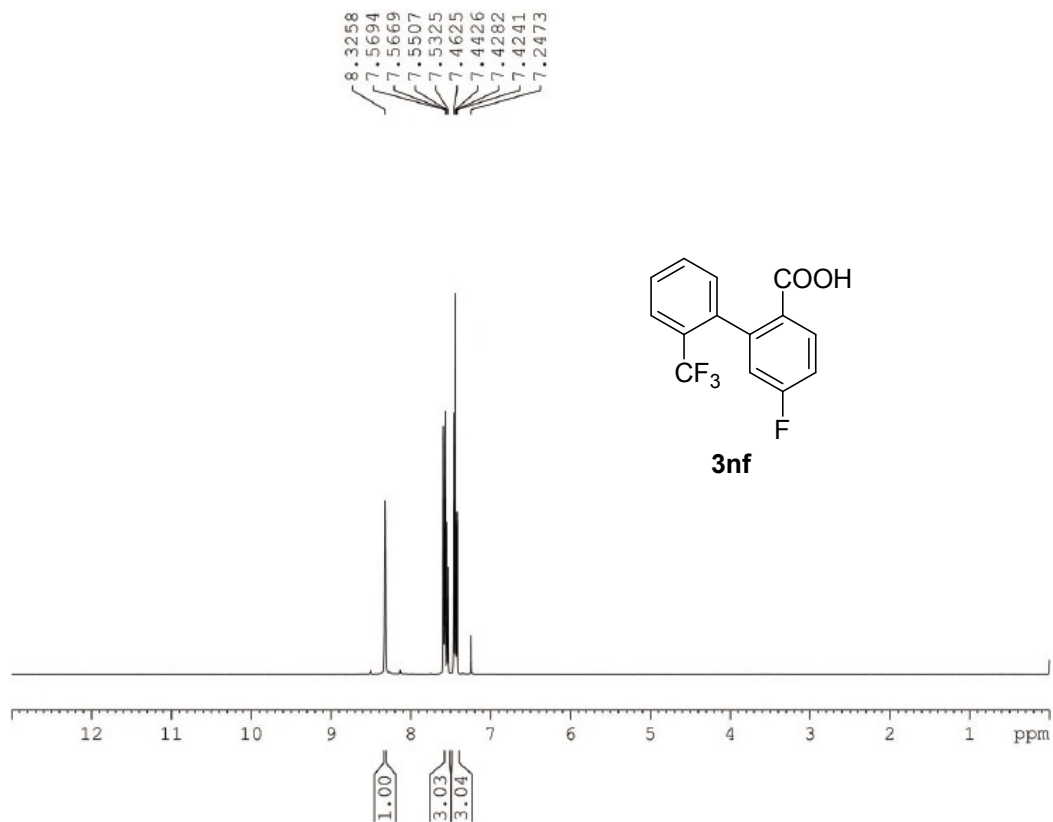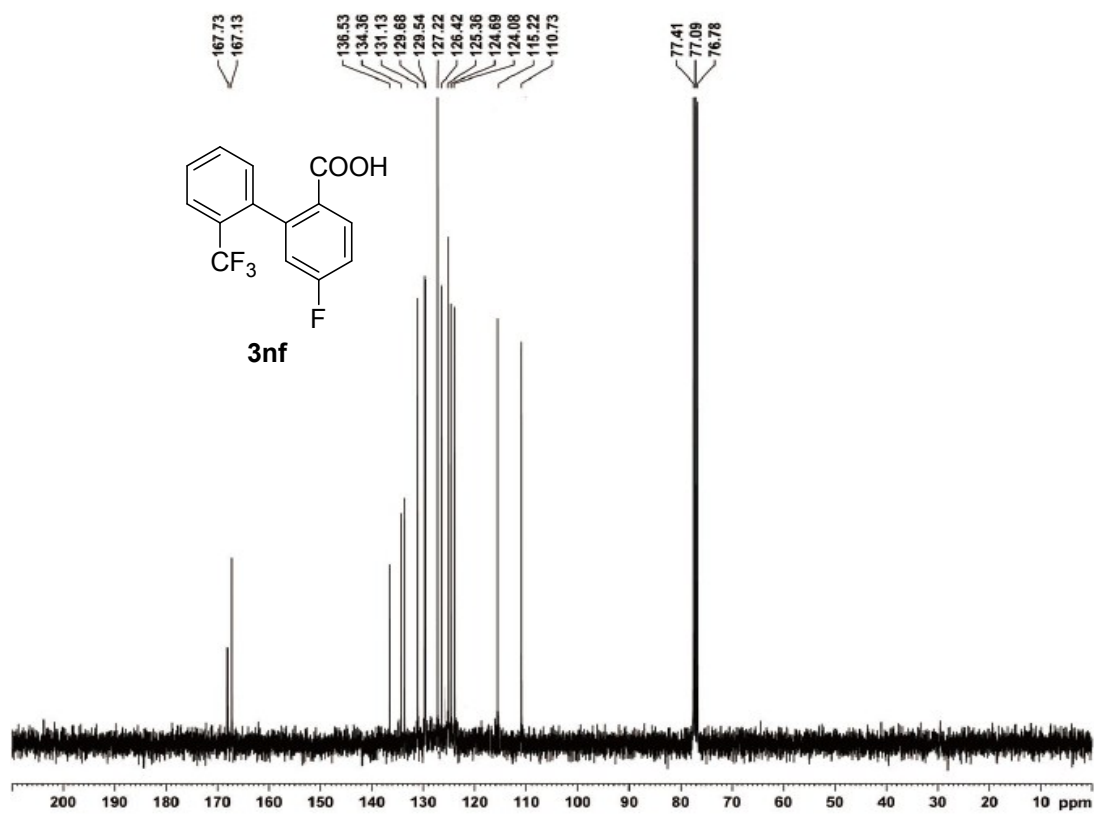

—11.5172

8.1651  
8.1446  
8.1301  
8.1155  
8.0997  
8.0942  
8.0787  
7.4765  
7.4605  
7.4560  
7.2622  
7.1567  
7.1511  
7.1339  
7.1154  
7.1106

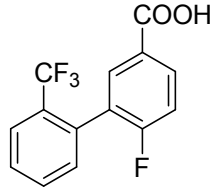

4nf

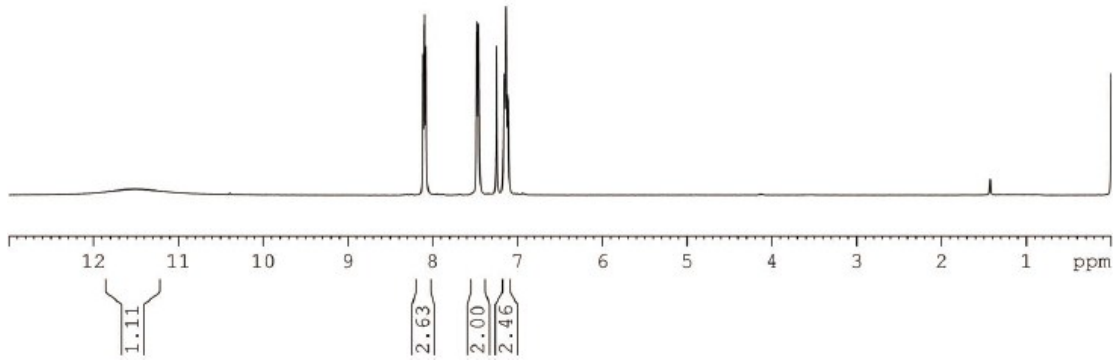

169.20  
163.96  
131.42  
131.27  
130.56  
129.92  
129.60  
129.01  
127.72  
127.61  
127.26  
126.18  
123.98  
114.66  
77.45  
77.20  
76.95

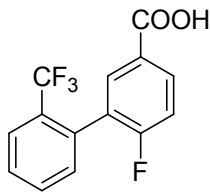

4nf

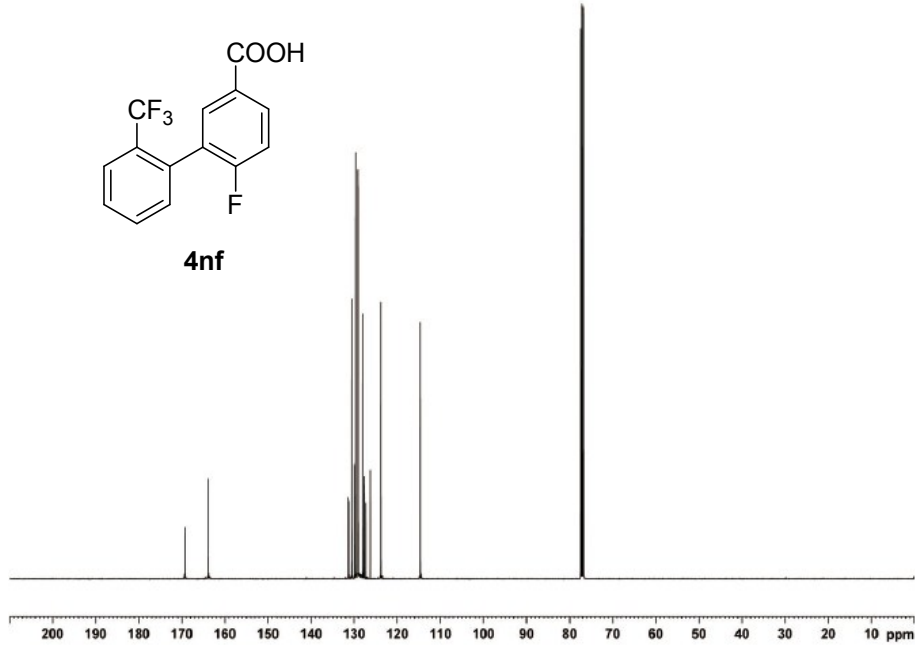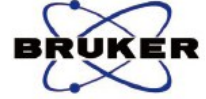

NAME LRM2015-1-14-3-C13-1  
EXPNO 1  
PROCNO 1  
Date\_ 20150115  
Time 4.38  
INSTRUM spect  
PROBRD 5 mm DABO BB/  
PULPROG zgpg30  
TD 65536  
SOLVENT CDCl3  
NS 1024  
DS 4  
SWH 29761.904 Hz  
FIDRES 0.454131 Hz  
AQ 1.1010548 sec  
RG 2050  
RW 16.800 usec  
DE 6.50 usec  
TE 298.0 K  
D1 2.0000000 sec  
D11 0.03000000 sec  
TDO 1

----- CHANNEL f1 -----  
SFO1 125.7703637 MHz  
NUC1 13C  
P1 9.80 usec  
SI 32768  
SF 125.7577865 MHz  
WDW EM  
SSB 0  
LB 1.00 Hz  
GB 0  
PC 1.40

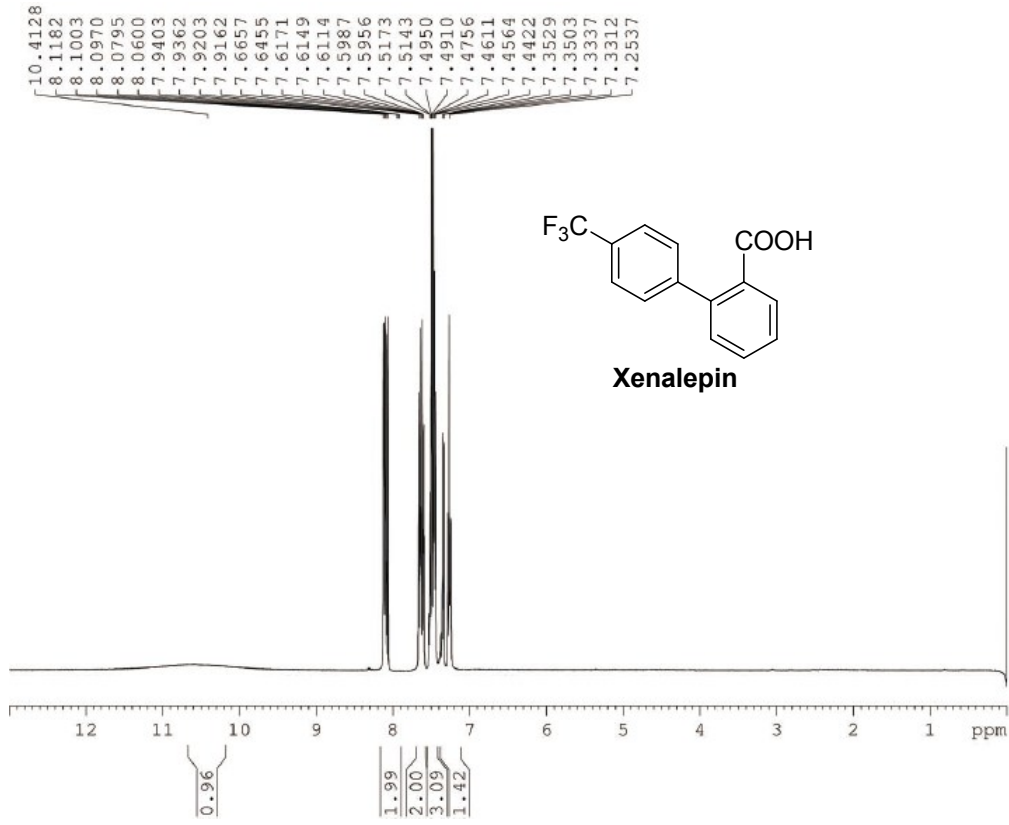

```

NAME LKM2014-9-23-1
EXPNO 1
PROCNO 1
Date_ 20140923
Time 9.55
INSTRUM spect
PROBHD 5 mm PABBO BB-
PULPROG zgpg30
TD 65536
SOLVENT CDCl3
NS 16
DS 2
SMB 823.685 Hz
FIDRES 0.125483 Hz
AQ 3.9846387 sec
RG 203
DM 60.800 usec
DE 6.50 usec
TE 298.0 K
D1 1.00000000 sec
D0
----- CHANNEL f1 -----
NUC1 1H
P1 13.80 usec
PL1 -1.00 dB
PLW 13.18669796 W
SF01 400.1724712 MHz
SI 32768
SP 400.1700063 MHz
WDW EM
SSB 0
LB 0.30 Hz
GB 0
PC 1.00

```

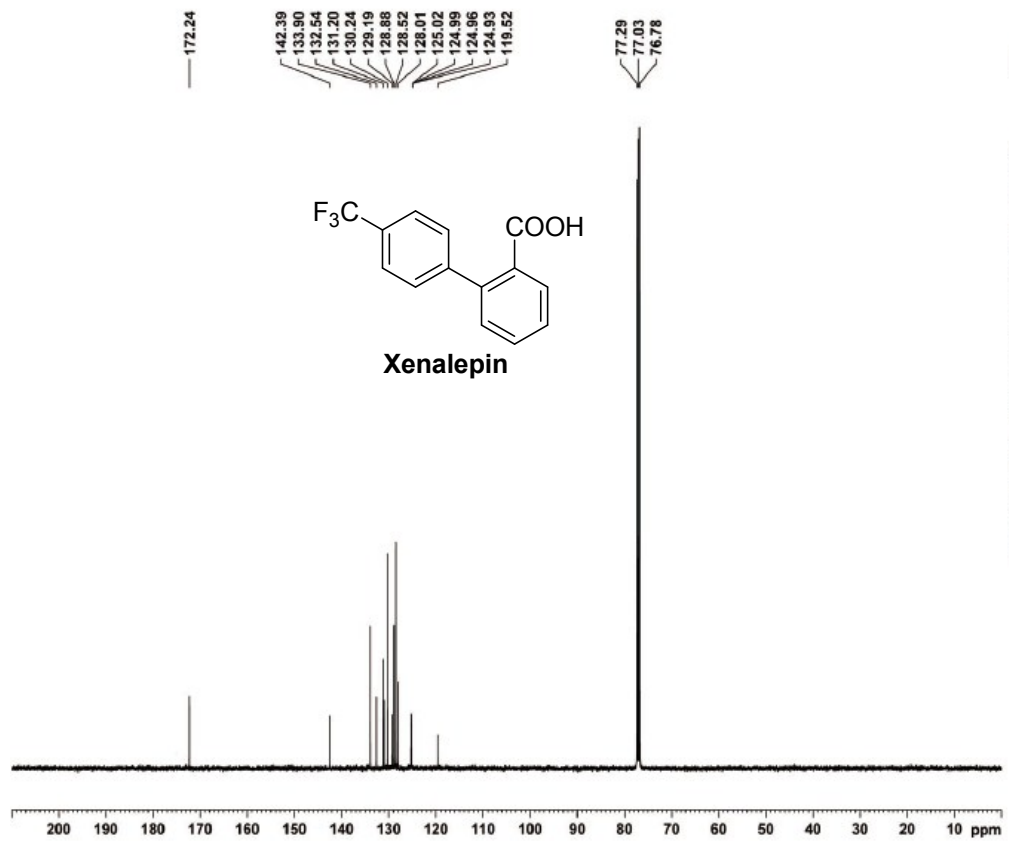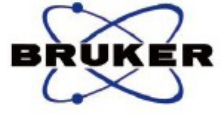

```

NAME LKM2014-9-23-1-C13
EXPNO 1
PROCNO 1
Date_ 20140924
Time 23.17
INSTRUM spect
PROBHD 5 mm PABBO BB/
PULPROG zgpg30
TD 65536
SOLVENT CDCl3
NS 500
DS 4
SMB 29761.904 Hz
FIDRES 0.454131 Hz
AQ 1.1010548 sec
RG 2050
DM 16.800 usec
DE 6.50 usec
TE 298.0 K
D1 2.00000000 sec
D11 0.03000000 sec
D0 1
----- CHANNEL f1 -----
SF01 125.7703637 MHz
NUC1 13C
P1 9.80 usec
PL1 0
SI 32768
SF 125.7577885 MHz
WDW EM
SSB 0
LB 1.00 Hz
GB 0
PC 1.40

```



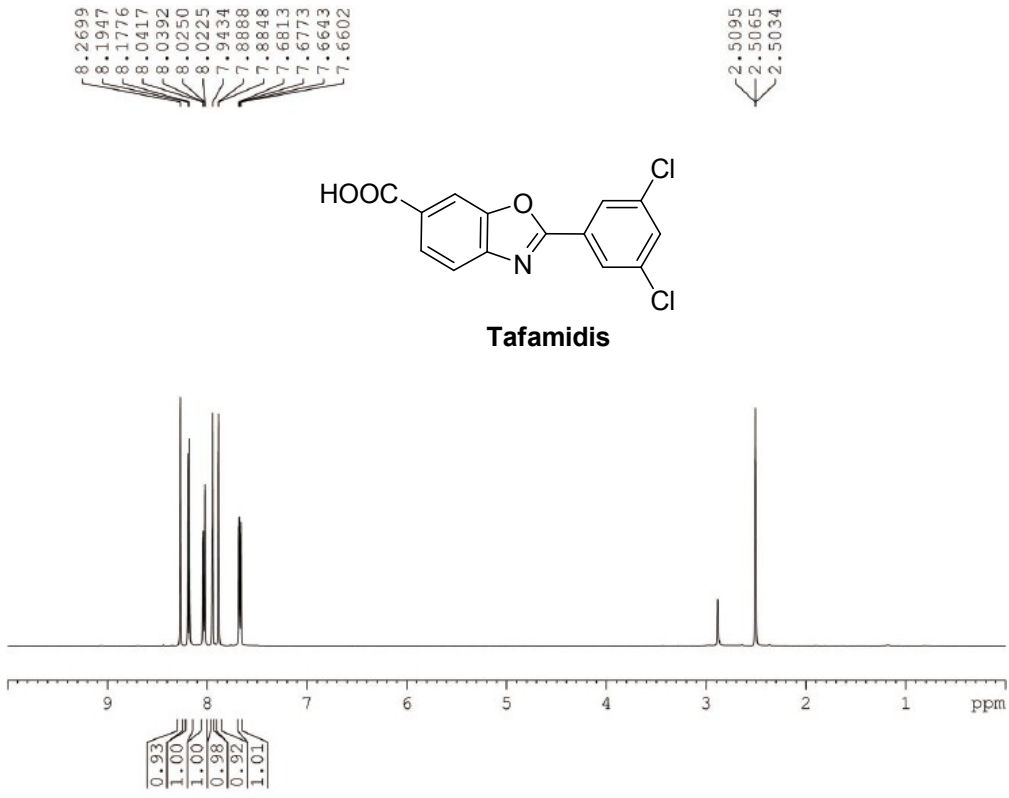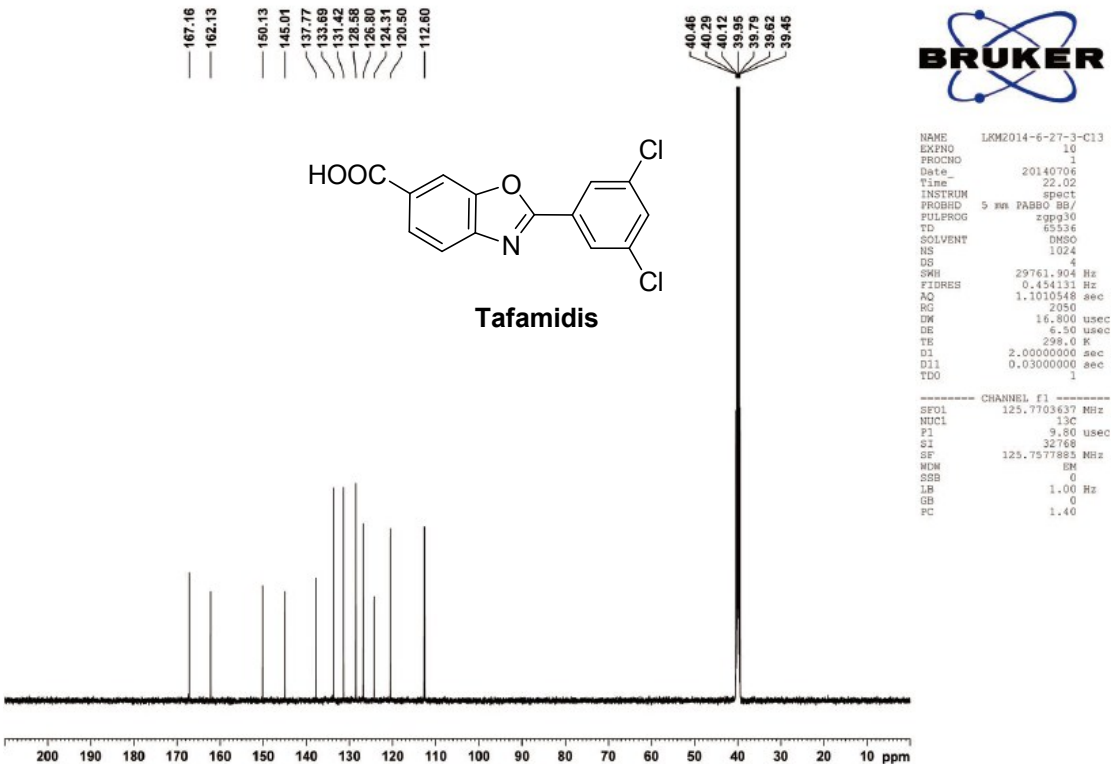

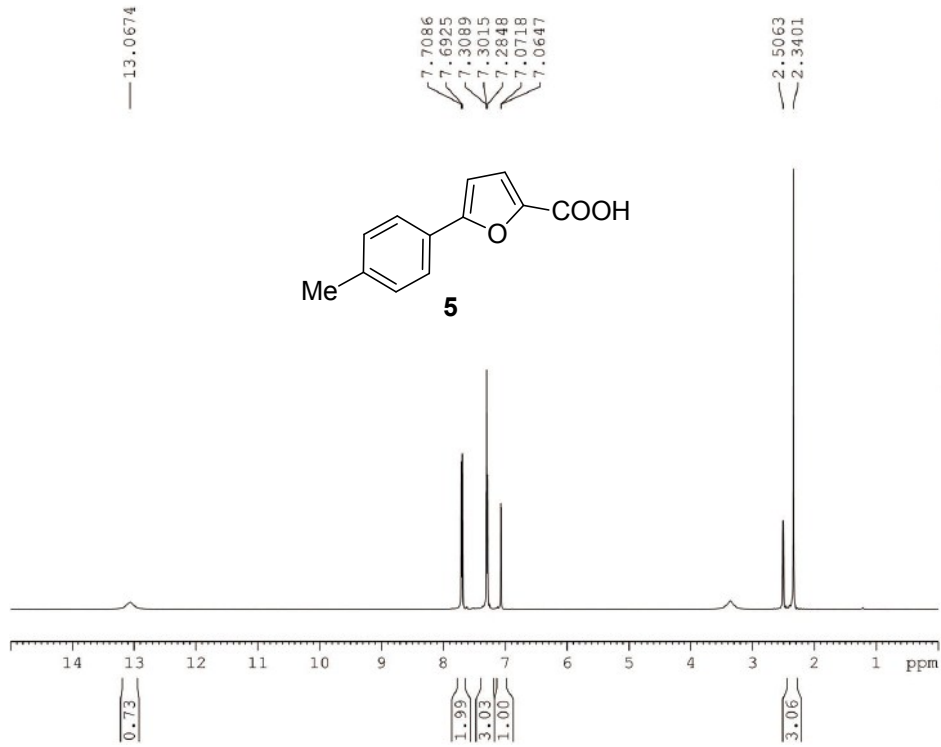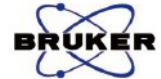

```

NAME LRM2014-6-27-6
EXPNO 1
PROCNO 1
Date_ 20140703
Time 19.44
INSTRUM spect
PROBHD 5 mm PABBO BB/
PULPROG zgpg30
TD 65536
SOLVENT DMSO
NS 16
DS 2
SWH 10800.000 Hz
FIDRES 0.135288 Hz
AQ 3.2768500 sec
RG 77.72
DM 50.000 usec
DE 6.50 usec
TE 298.0 K
D1 1.0000000 sec
TDO 1
----- CHANNEL f1 -----
SEOI 500.130885 MHz
NUC1 1H
P1 9.80 usec
SI 65536
SF 500.1300000 MHz
WDW EM
SSB 0
LB 0 Hz
GB 0
PC 1.00
  
```

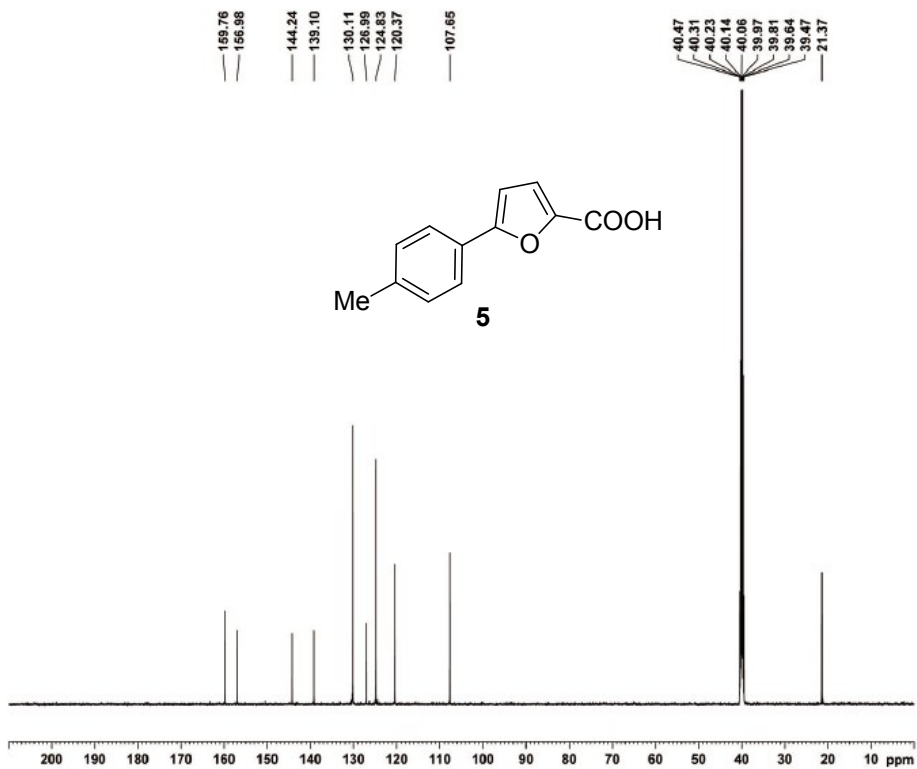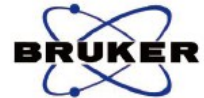

```

NAME LRM2014-6-27-6-C13
EXPNO 12
PROCNO 1
Date_ 20140707
Time 0.12
INSTRUM spect
PROBHD 5 mm PABBO BB/
PULPROG zgpg30
TD 65536
SOLVENT DMSO
NS 1024
DS 4
SWH 29761.904 Hz
FIDRES 0.454131 Hz
AQ 1.1010548 sec
RG 2050
DM 16.800 usec
DE 6.50 usec
TE 298.0 K
D1 2.0000000 sec
D11 0.0300000 sec
TDO 1
----- CHANNEL f1 -----
SEOI 125.7703637 MHz
NUC1 13C
P1 9.80 usec
SI 32768
SF 125.7577885 MHz
WDW EM
SSB 0
LB 1.00 Hz
GB 0
PC 1.40
  
```
